# Supplementary material
Source: PubMed Central journal article supplement (PMC7278522)
Supplement: NIHMS1590692-supplement-Supporting_Information.pdf [file NIHMS1590692-supplement-Supporting_Information.pdf]

## **Supporting Information**

### **Concise Formal Synthesis of the Pseudopterosins via Anionic Oxy-Cope/Transannular Michael Addition Cascade**

Vincenzo Ramella, Philipp C. Roosen and Christopher D. Vanderwal\*

# I. Experimental Information

## Materials and Methods

All reactions were conducted in flame- or oven-dried glassware under an inert atmosphere of argon (Ar) unless otherwise noted. Reaction solvents including dichloromethane ( $\text{CH}_2\text{Cl}_2$ , Fisher, HPLC Grade), hexanes (Fisher, HPLC Grade), diethyl ether ( $\text{Et}_2\text{O}$ , Fisher, BHT stabilized, HPLC Grade), benzene ( $\text{C}_6\text{H}_6$ , Fisher, HPLC Grade), tetrahydrofuran (THF, Fisher, HPLC Grade), and toluene ( $\text{PhCH}_3$ , Fisher, HPLC Grade) were dried by percolation through a column packed with neutral alumina and a column packed with Q5 reactant (a supported copper catalyst for scavenging oxygen) under a positive pressure of argon. Argon gas (5.0 grade, AR 5.0UH-T, Praxair) was dispensed from size T cylinders. Gases were dispensed into 12" helium quality latex balloons (CTI Industries or Sigma-Aldrich). All other commercially available solvents and/or reagents were used as received, unless otherwise noted.

Solvents for workup and chromatography were: acetone (Fisher, ACS grade), hexanes (Fisher or EMD, ACS Grade), ethyl acetate (EtOAc, Fisher, ACS Grade), dichloromethane ( $\text{CH}_2\text{Cl}_2$ , Fisher, ACS Grade), and methanol (MeOH, Fisher, ACS Grade). Reactions that were performed open to air utilized solvent dispensed from a wash bottle or solvent bottle, and no precautions were taken to exclude water. Column chromatography was performed using EMD Millipore 60 Å (0.040–0.063 mm) mesh silica gel ( $\text{SiO}_2$ ). Analytical thin-layer chromatography was performed on Merck silica gel 60 F254 TLC plates. Visualization was accomplished with UV (254 or 210 nm), and potassium permanganate ( $\text{KMnO}_4$ ), *p*-anisaldehyde, vanillin, cerium ammonium molybdate (CAM), or phosphomolybdic acid (PMA) staining solutions.

$^1\text{H}$  NMR and  $^{13}\text{C}$  NMR spectra were recorded at 298 K on Bruker GN500 (500 MHz,  $^1\text{H}$ ; 126 MHz,  $^{13}\text{C}$ ), Bruker CRYO500 (500 MHz,  $^1\text{H}$ ; 126 MHz,  $^{13}\text{C}$ ), and Bruker AVANCE600 (600 MHz,  $^1\text{H}$ ; 151 MHz,  $^{13}\text{C}$ ) spectrometers.  $^1\text{H}$  and  $^{13}\text{C}$  spectra were referenced to residual chloroform (7.26 ppm,  $^1\text{H}$ ; 77.00 ppm,  $^{13}\text{C}$ ). Chemical shifts are reported in ppm and multiplicities are indicated by: s (singlet), d (doublet), t (triplet), q (quartet), m (multiplet), and br s (broad singlet). Coupling constants, *J*, are reported in Hertz. Infrared (IR) spectra were recorded on a Perkin-Elmer spectrum RX1 FT-IR instrument. Mass spectrometry data was obtained from the University of California, Irvine Mass Spectrometry Facility. High-resolution mass spectra (HRMS) were recorded on a Waters LCT Premier spectrometer using ESI-TOF (electrospray ionization-time of flight) and data are reported in the form of (*m/z*). Melting points (mp) were recorded on a Laboratory Devices MelTemp II melting point apparatus and are uncorrected. Optical rotations were measured using Jasco P-1010 polarimeter. Chloroform-*d* ( $\text{CDCl}_3$ , D 99.8%, DLM-7) was purchased from Cambridge Isotope Laboratories. (*R*)-3-methylcyclohexan-1-one was synthesized according to a literature procedure.<sup>1</sup>

## Optimization of Aldol Condensation

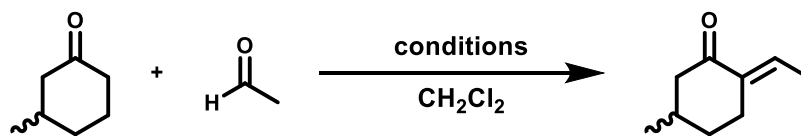

| Entry       | Aldehyde [eq.] | Reagents [eq.]                                                 | yield  |
|-------------|----------------|----------------------------------------------------------------|--------|
| 1           | 1.0            | 1.1 TiCl <sub>4</sub> , 1.2 EtNiPr <sub>2</sub>                | 44%    |
| 2           | 1.1            | 1.2 TiCl <sub>4</sub> , 1.3 EtNiPr <sub>2</sub>                | 58%    |
| 3 (10 mmol) | 1.1            | 1.2 TiCl <sub>4</sub> , 1.3 EtNiPr <sub>2</sub>                | 22-35% |
| 4           | 2.0            | 1.5 TMSOTf, 1.5 EtNiPr <sub>2</sub> then TiCl <sub>4</sub> 0.1 | 27%    |
| 5           | 2.0            | 1.5 TMSOTf, 1.5 EtNiPr <sub>2</sub> , then 0.05 TMSOTf         | 60%    |

To a solution of ( $\pm$ )-3-methylcyclohexanone (**12**) (1.0 equiv.) in anhydrous CH<sub>2</sub>Cl<sub>2</sub>, the Lewis acid and base were added sequentially. The resulting solution was stirred for 15 min, at which time freshly distilled acetaldehyde was added and stirring was continued for 10 min. The reaction mixture was allowed to warm to room temperature and stirring was continued for 3 h. The reaction mixture was poured into NaHCO<sub>3</sub> (sat. aq.) and extracted with Et<sub>2</sub>O (3×50 mL). The combined organic layers were washed with brine and dried over MgSO<sub>4</sub>. The volatiles were removed under reduced pressure and purification by flash chromatography (hexanes/Et<sub>2</sub>O = 20/1) afforded the desired product **13** as a colorless oil.

## Experimental Procedures and Characterization Data

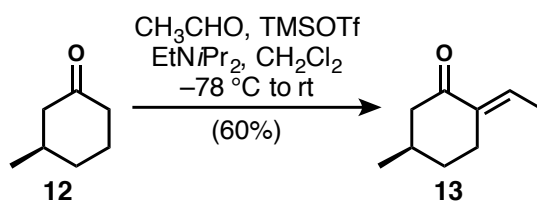

**Enone 13:** To a solution of (*R*)-3-methylcyclohexanone (**12**) (9.8 g, 87 mmol, 1.0 equiv.) and *N,N*-diisopropylethylamine (31 mL, 0.18 mol, 2.0 equiv.) in anhydrous CH<sub>2</sub>Cl<sub>2</sub> (220 mL) at -78 °C was added TMSOTf (32 mL, 0.18 mol, 2.0 equiv.) dropwise over 40 min. The resulting solution was stirred for 15 min, at which time freshly distilled acetaldehyde (15 mL, 0.26 mol, 3.0 equiv.) was added and stirring was continued for 10 min. Following the addition of more TMSOTf (1.5 mL, 8.7 mmol, 0.10 equiv.), the reaction mixture was allowed to warm to room temperature and stirring was continued for 3 h. The reaction mixture was poured into NaHCO<sub>3</sub> (sat. aq.) and extracted with Et<sub>2</sub>O (3×50 mL). The combined organic extracts were washed with brine and dried over MgSO<sub>4</sub>. The volatiles were removed under reduced pressure and purification by flash chromatography (hexanes/Et<sub>2</sub>O = 20/1) afforded the desired

product **13** as a colorless oil (7.2 g, 60%). The spectral data for this compound are consistent with those reported in the literature.<sup>2</sup>

<sup>1</sup>H NMR (600 MHz, CDCl<sub>3</sub>) δ 6.76 – 6.66 (m, 1H), 2.71 (d, *J* = 16.7 Hz, 1H), 2.54 (d, *J* = 13.8 Hz, 1H), 2.27 (t, *J* = 13.0 Hz, 1H), 2.05 – 1.92 (m, 2H), 1.90 (d, *J* = 13.2 Hz, 1H), 1.74 (d, *J* = 7.2 Hz, 3H), 1.39 – 1.27 (m, 1H), 1.02 (d, *J* = 6.0 Hz, 3H).

<sup>13</sup>C NMR (151 MHz, CDCl<sub>3</sub>) δ 201.1, 136.6, 134.3, 48.5, 31.7, 30.2, 25.4, 21.9, 13.78.

IR (film) 2952, 2927, 2871, 1687, 1617 cm<sup>-1</sup>.

HRMS (ESI) *m/z* calculated for C<sub>9</sub>H<sub>14</sub>O [M+H]<sup>+</sup> 139.1118, found 139.1123.

[α]<sub>D</sub><sup>22</sup> = +85.7 (*c* = 1.0, CHCl<sub>3</sub>).

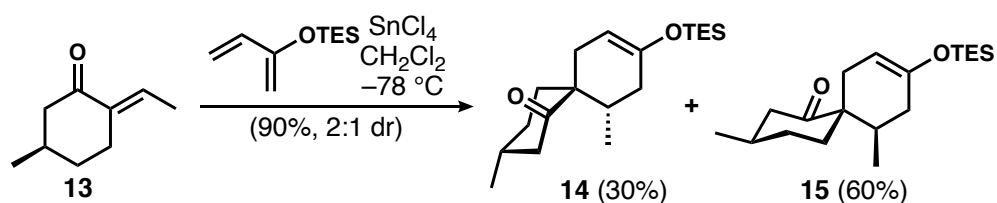

**Spirocyclic ketones 14 and 15:** To a solution of ketone (1.4 g, 9.8 mmol, 1.0 equiv.) and silyl enol ether (1.8 g, 9.8 mmol, 1.0 equiv.) at  $-78^\circ\text{C}$  in anhydrous CH<sub>2</sub>Cl<sub>2</sub> (20 mL) was added a solution of SnCl<sub>4</sub> (1.0 M in CH<sub>2</sub>Cl<sub>2</sub>, 0.49 mL, 0.49 mmol, 0.05 equiv.) and the resulting solution was stirred for 1 h at  $-78^\circ\text{C}$ . Pyridine (1.0 mL) was added and the reaction was allowed to warm to room temperature. The resulting suspension was filtered over SiO<sub>2</sub> with ethyl acetate. The volatiles were removed under reduced pressure and purification by flash chromatography (hexanes/Et<sub>2</sub>O = 40/1) afforded product **14** (1.9 g, 60%) and product **15** (0.95 g, 30%) each as colorless oils.

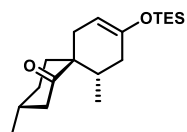

<sup>1</sup>H NMR (500 MHz, CDCl<sub>3</sub>) δ 4.82 – 4.71 (m, 1H), 2.45 – 2.36 (m, 1H), 2.34 – 2.26 (m, 2H), 2.24 – 2.12 (m, 1H), 2.01 – 1.88 (m, 2H), 1.88 – 1.81 (m, 1H), 1.81 – 1.65 (m, 3H), 1.58 – 1.34 (m, 2H), 1.04 – 0.99 (m, 3H), 0.99 – 0.91 (m, 12H), 0.63 (q, *J* = 7.8 Hz, 6H).

<sup>13</sup>C NMR (126 MHz, CDCl<sub>3</sub>) δ 214.6, 147.3, 101.5, 50.2, 46.2, 34.9, 34.9, 32.2, 31.1, 29.5, 28.7, 21.8, 14.9, 6.9, 5.1.

HRMS (ESI) *m/z* calculated for C<sub>19</sub>H<sub>34</sub>O<sub>2</sub>SiNa [M+Na]<sup>+</sup> 345.2220, found 345.2235.

IR (film) 2952, 2914, 2874, 1706, 1676 cm<sup>-1</sup>.

[α]<sub>D</sub><sup>22</sup> = +17.9 (*c* = 1.0, CHCl<sub>3</sub>).

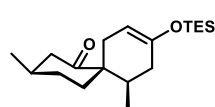

<sup>1</sup>H NMR (500 MHz, CDCl<sub>3</sub>) δ 4.76 – 4.55 (m, 1H), 2.45 – 2.27 (m, 2H), 2.23 (dd, *J* = 16.5, 5.2 Hz, 1H), 2.11 – 2.02 (m, 2H), 1.98 (d, *J* = 16.1 Hz, 1H), 1.81 (dt, *J* = 12.9, 3.3 Hz, 2H), 1.75 – 1.63 (m, 2H), 1.56 – 1.33 (m, 2H), 1.03 – 0.89 (m, 12H), 0.85 (d, *J* = 6.7 Hz, 3H), 0.64 (q, *J* = 7.9 Hz, 6H).

$^{13}\text{C}$  NMR (126 MHz,  $\text{CDCl}_3$ )  $\delta$  215.4, 150.0, 99.9, 49.2, 47.8, 35.2, 33.4, 32.2, 32.1, 29.5, 26.5, 22.3, 16.3, 6.8, 5.2.

HRMS (ESI)  $m/z$  calculated for  $\text{C}_{19}\text{H}_{34}\text{O}_2\text{SiNa}$   $[\text{M}+\text{Na}]^+$  345.2220, found 345.2226.

IR (film) 2953, 2875, 1704, 1675  $\text{cm}^{-1}$ .

$[\alpha]_D^{22} = -30.2$  ( $c = 1.0$ ,  $\text{CHCl}_3$ ).

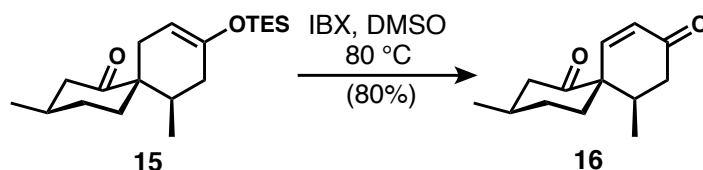

**Spirocyclic ketoenone 16**: Silyl enol ether **15** (0.39 g, 1.2 mmol, 1.0 equiv.) and IBX (0.68 g, 2.4 mmol, 2.0 equiv.) were dissolved in DMSO (12 ml) under an argon atmosphere and the mixture was heated to 80 °C for 1 h.  $\text{NaHCO}_3$  (sat. aq.) was added and the resulting mixture was extracted with EtOAc (5×20 mL). The combined organic extracts were washed with brine (10 mL) and dried over  $\text{MgSO}_4$ . The volatiles were removed under reduced pressure and purification by flash chromatography (hexanes/EtOAc = 10/1) afforded the desired product **16** as a colorless oil (0.20 g, 80%).

$^1\text{H}$  NMR (500 MHz,  $\text{CDCl}_3$ )  $\delta$  6.95 (d,  $J = 10.3$  Hz, 1H), 6.01 (d,  $J = 10.3$  Hz, 1H), 2.84 – 2.77 (m, 1H), 2.74 (dd,  $J = 17.0, 4.6$  Hz, 1H), 2.44 (ddd,  $J = 13.8, 4.3, 1.9$  Hz, 1H), 2.36 – 2.27 (m, 1H), 2.22 (dd,  $J = 16.9, 8.0$  Hz, 1H), 2.03 (dt,  $J = 13.5, 3.5$  Hz, 1H), 2.00 – 1.90 (m,  $J = 11.8, 6.6$  Hz, 1H), 1.89 – 1.81 (m, 1H), 1.80 – 1.72 (m, 1H), 1.65 – 1.54 (m, 1H), 1.08 (d,  $J = 6.5$  Hz, 3H), 0.94 (d,  $J = 6.9$  Hz, 3H).

$^{13}\text{C}$  NMR (126 MHz,  $\text{CDCl}_3$ )  $\delta$  209.2, 198.9, 148.4, 129.6, 54.0, 47.8, 42.7, 35.2, 33.7, 33.1, 29.5, 22.3, 16.1.

HRMS (ESI)  $m/z$  calculated for  $\text{C}_{13}\text{H}_{18}\text{O}_2\text{Na}$   $[\text{M}+\text{Na}]^+$  229.1199, found 229.1207.

IR (film) 2926, 2869, 1705, 1678  $\text{cm}^{-1}$ .

$[\alpha]_D^{22} = +13.9$  ( $c = 1.0$ ,  $\text{CHCl}_3$ ).

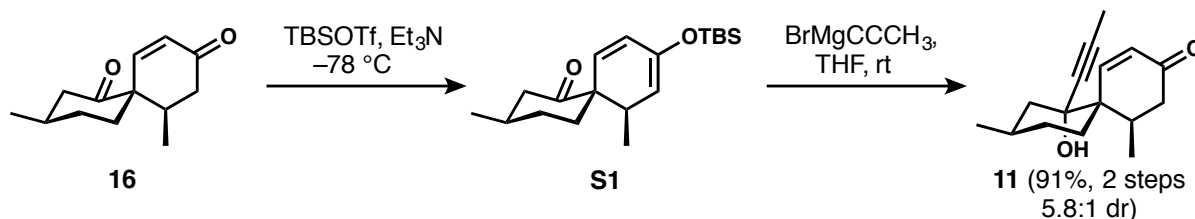

**Propargylic alcohols 11**: To a solution of ketone (0.56 g, 2.7 mmol, 1.0 equiv.) in anhydrous  $\text{CH}_2\text{Cl}_2$  (27 mL) at  $-78$  °C was added  $\text{Et}_3\text{N}$  (1.3 mL, 9.5 mmol, 3.5 equiv.) followed by TBSOTf (0.68 mL, 3.0 mmol, 1.1 equiv.). The resulting mixture was stirred at  $-78$  °C for 3 h, at which time it was poured into  $\text{NaHCO}_3$  (sat. aq., 20 mL) and extracted with hexanes (3×20 mL). The combined organic extracts were

washed with brine and dried over MgSO<sub>4</sub>. The volatiles were removed under reduced pressure and purification by flash chromatography (hexanes/EtOAc = 40/1→20/1→4/1) afforded the desired product **S1** as a colorless oil (0.87 g, 98%).

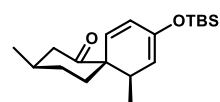

**<sup>1</sup>H NMR (500 MHz, CDCl<sub>3</sub>)** δ 5.82 – 5.60 (m, 2H), 4.83 (d, *J* = 3.9 Hz, 1H), 3.05 – 2.87 (m, 1H), 2.41 (t, *J* = 13.1 Hz, 1H), 2.24 (ddd, *J* = 13.3, 4.0, 2.0 Hz, 1H), 2.06 – 1.95 (m, 1H), 1.88 – 1.73 (m, 1H), 1.73 – 1.65 (m, 1H), 1.59 – 1.43 (m, 2H), 1.02 (d, *J* = 6.5 Hz, 3H), 0.92 – 0.87 (m, 12H), 0.11 (s, 3H), 0.10 (s, 3H).

**<sup>13</sup>C NMR (126 MHz, CDCl<sub>3</sub>)** δ 210.1, 145.4, 128.8, 127.3, 111.7, 51.9, 47.0, 35.6, 32.0, 31.8, 29.7, 25.8, 22.5, 18.2, 14.5, –4.4, –4.5.

**HRMS (ESI)** *m/z* calculated for C<sub>19</sub>H<sub>32</sub>O<sub>2</sub>SiNa [M+Na]<sup>+</sup> 343.2064, found 343.2075.

**IR (film)** 2954, 2928, 2856, 1709, 1650 cm<sup>-1</sup>.

**[α]<sub>D</sub><sup>22</sup>** = –226.4 (*c* = 1.0, CHCl<sub>3</sub>).

To a solution of silyl enol ether **S1** (0.83 g, 2.6 mmol, 1.0 equiv.) in anhydrous THF (26 mL) at room temperature was added a solution of propynylmagnesium bromide (0.5 M in THF, 20 mL, 4.0 equiv.). The resulting mixture was stirred for 15 h at room temperature, at which time HCl (aq., 1.0 M) was added until the reaction mixture was acidified. After stirring for 1 h the reaction was extracted with EtOAc (3×20 mL). The combined organic extracts were washed with brine (20 mL) and dried over MgSO<sub>4</sub>. The volatiles were removed under reduced pressure and purification by flash chromatography (hexanes/EtOAc = 10/1→4/1→2/1) afforded product **11** as a colorless oil (0.52 g, 80%) and product **11'** as a colorless solid (90 mg, 14%). Compound **11'** was characterized by X-ray crystallography; the structure and associated data can be found in Section II of this Supporting Information.

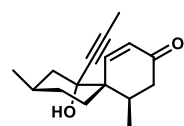

**<sup>1</sup>H NMR (500 MHz, CDCl<sub>3</sub>)** δ 6.93 (d, *J* = 10.6 Hz, 1H), 6.01 (d, *J* = 10.6 Hz, 1H), 2.87 – 2.70 (m, 2H), 2.22 (dd, *J* = 16.7, 8.6 Hz, 1H), 2.10 – 1.95 (m, 1H), 1.91 – 1.78 (m, 3H), 1.78 – 1.68 (m, 4H), 1.64 – 1.50 (m, 2H), 1.20 – 1.06 (m, 4H), 0.92 (d, *J* = 6.3 Hz, 3H).

**<sup>13</sup>C NMR (126 MHz, CDCl<sub>3</sub>)** δ 200.2, 153.6, 128.9, 82.8, 82.4, 73.5, 47.0, 46.0, 44.0, 34.4, 29.6, 27.0, 26.8, 21.8, 19.1, 3.6.

**IR (film)** 3400 (br), 2948, 2920, 2867, 1664 cm<sup>-1</sup>.

**HRMS (ESI)** *m/z* calculated for C<sub>16</sub>H<sub>22</sub>O<sub>2</sub>Na [M+Na]<sup>+</sup> 269.1512, found 269.1518.

**[α]<sub>D</sub><sup>22</sup>** = –41.2 (*c* = 1.0, CHCl<sub>3</sub>).

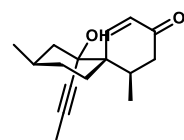

**<sup>1</sup>H NMR (500 MHz, CDCl<sub>3</sub>)** δ 6.77 (dd, *J* = 10.5, 1.6 Hz, 1H), 6.13 (d, *J* = 10.5 Hz, 1H), 3.41 (dd, *J* = 17.3, 5.6 Hz, 1H), 2.87 – 2.68 (m, 1H), 2.11 (dd, *J* = 17.3, 2.8 Hz, 1H), 1.90 (s, 3H), 1.82 – 1.74 (m, 1H), 1.73 – 1.66 (m, 1H), 1.66 – 1.52 (m, 3H), 1.33 (t, *J* = 12.5 Hz, 1H), 1.27 – 1.16 (m, 2H), 0.98 (d, *J* = 7.1 Hz, 3H), 0.96 (d, *J* = 6.6 Hz, 3H).

$^{13}\text{C}$  NMR (126 MHz,  $\text{CDCl}_3$ )  $\delta$  200.6, 147.3, 131.5, 83.9, 81.2, 76.1, 48.0, 46.1, 44.7, 36.5, 32.1, 30.4, 29.6, 21.7, 18.2, 3.9.

IR (film) 3393 (br), 2948, 2920, 2855, 1663  $\text{cm}^{-1}$ .

HRMS (ESI)  $m/z$  calculated for  $\text{C}_{16}\text{H}_{22}\text{O}_2\text{Na}$   $[\text{M}+\text{Na}]^+$  269.1512, found 269.1517.

$[\alpha]_D^{22} = +104.6$  ( $c = 1.0$ ,  $\text{CHCl}_3$ ).

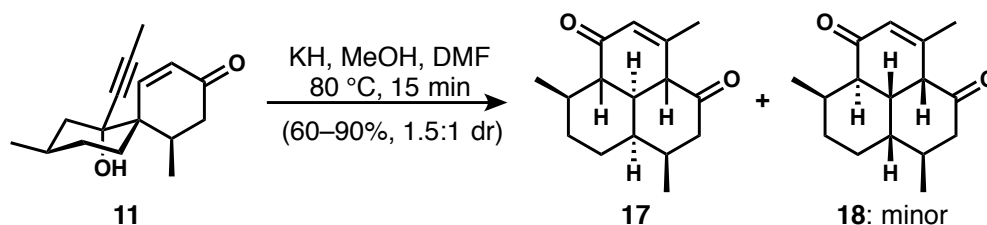

**Tricyclic enones 17 and 18:** To a suspension of KH (50 mg, 1.2 mmol, 4.0 equiv.) in carefully degassed anhydrous DMF (1.5 mL) and methanol (1.5 mL) at 80 °C was added a solution of the alcohol **11** (76 mg, 0.31 mmol, 1.0 equiv.) in anhydrous DMF (1.5 mL). The color immediately turned a dark red and after less than 15 min the color changed to a yellow/brown color. After the color change the reaction mixture was poured quickly into an ice-cold solution  $\text{NH}_4\text{Cl}$  (sat. aq., 10 mL) and the resulting mixture was extracted with EtOAc ( $3 \times 10$  mL). The combined organic extracts were washed with brine (10 mL) and dried over  $\text{MgSO}_4$ . The volatiles were removed under reduced pressure and purification by flash chromatography (benzene/ $\text{Et}_2\text{O} = 20/1$ ) afforded the desired product **18** as a white solid (21 mg, 28%) and the undesired product **17** as a white solid (32 mg, 42%). The yield of this reaction varies owing to decomposition of the product under the reaction conditions. Compound **18** was characterized by X-ray crystallography; the structure and associated data can be found in Section II of this Supporting Information.

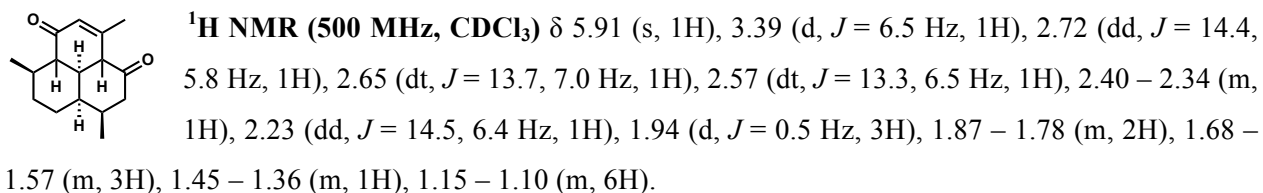

$^{13}\text{C}$  NMR (126 MHz,  $\text{CDCl}_3$ )  $\delta$  209.9, 200.6, 155.9, 128.8, 55.7, 49.6, 48.4, 44.1, 37.2, 36.5, 30.6, 29.0, 24.5, 24.0, 22.9, 19.6.

HRMS (ESI)  $m/z$  calculated for  $\text{C}_{16}\text{H}_{22}\text{O}_2\text{Na}$   $[\text{M}+\text{Na}]^+$  269.1512, found 269.1520.

IR (film) 2920, 2866, 1711, 1667, 1377  $\text{cm}^{-1}$ .

$[\alpha]_D^{22} = -100.0$  ( $c = 1.0$ ,  $\text{CHCl}_3$ ).

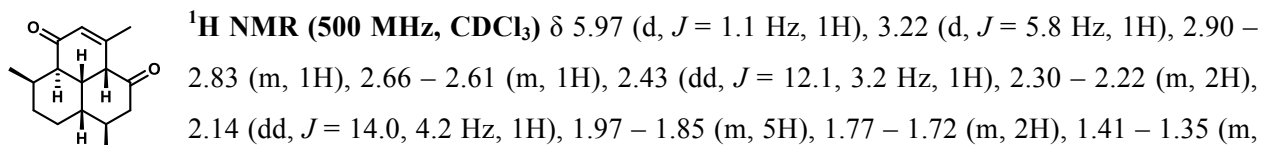

1H), 1.05 (d,  $J = 6.1$  Hz, 3H), 0.86 (d,  $J = 7.0$  Hz, 3H).

$^{13}\text{C}$  NMR (126 MHz,  $\text{CDCl}_3$ )  $\delta$  208.5, 198.9, 158.0, 128.7, 56.7, 49.8, 45.3, 42.8, 40.8, 31.0, 27.2, 26.8, 24.6, 20.5, 20.0, 13.0.

HRMS (ESI)  $m/z$  calculated for  $\text{C}_{16}\text{H}_{22}\text{O}_2\text{Na}$   $[\text{M}+\text{Na}]^+$  269.1512, found 269.1512.

IR (film) 2923, 1712, 1663, 1378  $\text{cm}^{-1}$ .

$[\alpha]_D^{22} = +20.9$  ( $c = 0.65$ ,  $\text{CHCl}_3$ ).

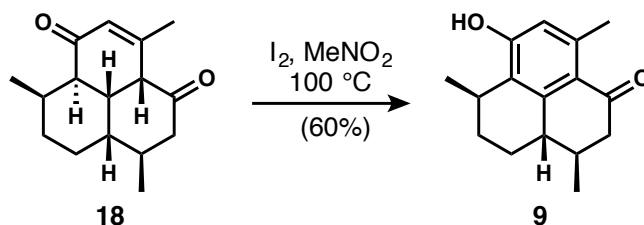

**Phenol 9:** Enone **18** (14 mg, 0.057 mmol, 1.0 equiv.) and iodine (87 mg, 0.34 mmol, 6.0 equiv.) were dissolved in anhydrous  $\text{MeNO}_2$  (0.50 mL) under an argon atmosphere and the resulting mixture was heated to 100 °C for 6 h.  $\text{Na}_2\text{S}_2\text{O}_3$  (sat. aq., 2.0 mL) was added and stirring was continued for 30 min. The resulting mixture was extracted with EtOAc (5×5 mL). The combined organic extracts were washed with brine (5.0 mL) and dried over  $\text{MgSO}_4$ . The volatiles were removed under reduced pressure and purification by flash chromatography (hexanes/acetone = 10/1) afforded the desired product **9** as a red solid (8.4 mg, 60%).

$^1\text{H}$  NMR (500 MHz,  $\text{CDCl}_3$ )  $\delta$  6.52 (s, 1H), 5.37 (s, 1H), 3.16 (dd,  $J = 14.7, 7.4$  Hz, 1H), 2.68 – 2.47 (m, 4H), 2.39 – 2.17 (m, 4H), 1.85 – 1.64 (m, 1H), 1.40 (tdd,  $J = 12.8, 8.4, 4.1$  Hz, 1H), 1.27 (d,  $J = 6.8$  Hz, 3H), 1.16 – 1.06 (m, 4H).

$^{13}\text{C}$  NMR (126 MHz,  $\text{CDCl}_3$ )  $\delta$  199.7, 157.2, 148.4, 141.3, 125.9, 124.7, 117.7, 48.9, 44.6, 35.3, 31.7, 28.1, 27.3, 23.5, 22.7, 19.6.

HRMS (ESI)  $m/z$  calculated for  $\text{C}_{16}\text{H}_{20}\text{O}_2\text{Na}$   $[\text{M}+\text{Na}]^+$  267.1356, found 267.1360.

$[\alpha]_D^{22} = -23.6$  ( $c = 0.20$ ,  $\text{CHCl}_3$ ), Lit:  $[\alpha]_D^{25} = 62.4$  ( $c = 0.5$ ,  $\text{CHCl}_3$ ) for enantiomer.

The spectral data for this compound are consistent with those reported in the literature.<sup>3</sup>

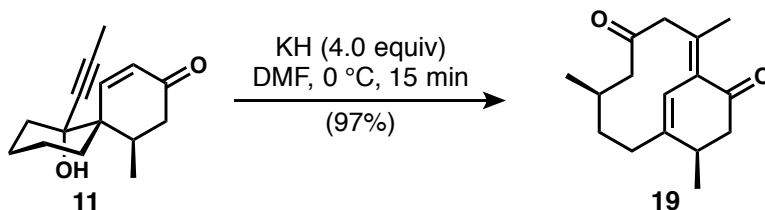

**Bicyclic dienedione 19:** To a suspension of KH (80 mg, 0.20 mmol, 4.0 equiv.) in carefully degassed anhydrous DMF (5.0 mL) at 0 °C was added a solution of the alcohol **11** (123 mg, 0.50 mmol, 1.0 equiv.)



in anhydrous DMF (5.0 mL). The color immediately turned into a dark red and after 15 min the color changed to a yellow/brown color. After the color change, acetic acid (0.5 mL) was added. The resulting mixture was poured into water (15 mL) and extracted with EtOAc (3×20 mL). The combined organic extracts were washed with brine (20 mL) and dried over MgSO<sub>4</sub>. The volatiles were removed under reduced pressure and purification by flash chromatography (hexanes/EtOAc = 4/1) afforded the desired product **19** as a colorless oil (120 mg, 97%).

<sup>1</sup>H NMR (600 MHz, CDCl<sub>3</sub>) δ 6.03 (s, 1H), 3.24 (s, 2H), 2.73 (dd, *J* = 15.6, 9.1 Hz, 1H), 2.58 (dd, *J* = 16.5, 5.3 Hz, 1H), 2.45 – 2.33 (m, 1H), 2.34 – 2.22 (m, 6H), 2.21 – 2.13 (m, 1H), 2.10 (dd, *J* = 15.7, 4.1 Hz, 1H), 1.96 – 1.88 (m, 1H), 1.66 – 1.55 (m, 1H), 1.08 – 1.00 (m, 6H).

<sup>13</sup>C NMR (151 MHz, CDCl<sub>3</sub>) δ 208.6, 201.3, 145.8, 140.3, 129.2, 124.4, 53.4, 51.4, 47.7, 33.4, 31.6, 30.0 (2×C), 22.6, 22.3, 16.9.

HRMS (ESI) *m/z* calculated for C<sub>16</sub>H<sub>22</sub>O<sub>2</sub>Na [M+Na]<sup>+</sup> 269.1512, found 269.1514.

IR (film) 2955, 2926, 2872, 1686, 1586 cm<sup>-1</sup>.

[α]<sub>D</sub><sup>22</sup> = +100.6 (*c* = 1.0, CHCl<sub>3</sub>).

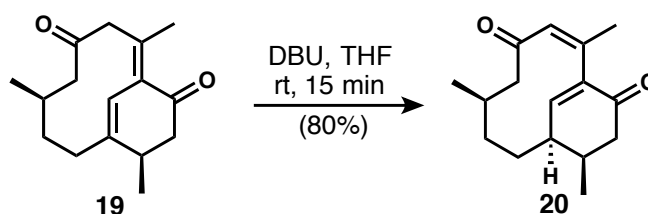

**Bicyclic dienedione 20:** To a solution of **19** (18 mg, 0.073 mmol, 1.0 equiv.) in carefully degassed anhydrous THF (1.0 mL) at rt was added DBU (33 μL, 0.22 mmol, 3.0 equiv.). After 15 min a solution of NH<sub>4</sub>Cl (sat. aq., 1 mL) and HCl (1.0 M, 0.20 mL) was added. The resulting mixture was extracted with EtOAc (3×5 mL). The combined organic extracts were washed with brine (5 mL) and dried over MgSO<sub>4</sub>. The volatiles were removed under reduced pressure and purification by flash chromatography (hexanes/EtOAc = 9/1) afforded the desired product **20** as a colorless solid (14 mg, 80%). This compound was characterized by X-ray crystallography; the structure and associated data can be found in Section II of this Supporting Information.

<sup>1</sup>H NMR (600 MHz, CDCl<sub>3</sub>) δ 7.06 (d, *J* = 6.5 Hz, 1H), 5.94 (s, 1H), 2.52 – 2.37 (m, 6H), 2.07 (s, 3H), 1.86 (d, *J* = 13.1 Hz, 1H), 1.78 (ddd, *J* = 14.0, 9.8, 4.7 Hz, 1H), 1.62 – 1.52 (m, 2H), 1.30 – 1.26 (m, 1H), 1.03 (d, *J* = 6.4 Hz, 3H), 0.87 (d, *J* = 6.6 Hz, 3H).

<sup>13</sup>C NMR (151 MHz, CDCl<sub>3</sub>) δ 205.3, 197.1, 158.4, 148.6, 139.4, 134.1, 46.9, 41.7, 39.1, 32.1, 28.6, 26.6, 22.1, 20.3, 20.0, 18.3.

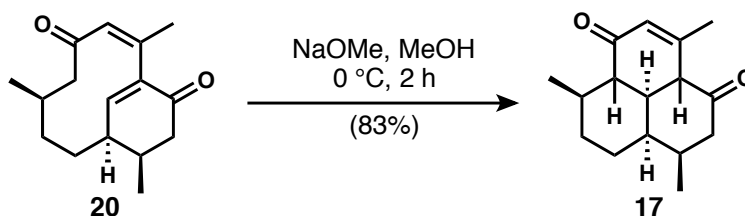

**Tricyclic enone 17:** To a solution of **20** (12 mg, 0.049 mmol, 1.0 equiv.) in carefully degassed anhydrous MeOH (1.0 mL) at 0 °C was added a solution of NaOMe in MeOH (0.05 M, 0.0049 mmol, 0.10 equiv.). After 2 h the volatiles were removed under reduced pressure and purification by flash chromatography (hexanes/EtOAc = 20/1) afforded the product **17** as a colorless solid (10 mg, 83%). Characterization data for **17** can be found above.

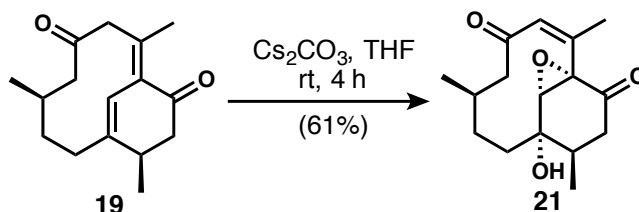

**Epoxide 21:** To a solution of **19** (24 mg, 0.10 mmol, 1.0 equiv.) in anhydrous THF (1.0 mL) at rt was added Cs<sub>2</sub>CO<sub>3</sub> (98 mg, 0.30 mmol, 3.0 equiv.). After 4 h water (2 mL) was added. The resulting mixture was extracted with EtOAc (3×5 mL). The combined organic extracts were washed with brine (5 mL) and dried over MgSO<sub>4</sub>. the volatiles were removed under reduced pressure and purification by flash chromatography (hexanes/EtOAc = 10/1) afforded the product **21** as a colorless solid (17 mg, 61%, *ca.* 75% pure). In addition to the NMR data provided below, this compound was characterized by X-ray crystallography; the structure and associated data can be found in Section II of this Supporting Information.

<sup>1</sup>H NMR (600 MHz, CDCl<sub>3</sub>) δ 6.01 (s, 1H), 3.70 (s, 1H), 2.70 (dd, *J* = 20.2, 7.0 Hz, 1H), 2.63 – 2.56 (m, 1H), 2.56 – 2.46 (m, 2H), 1.96 – 1.82 (m, 5H), 1.81 – 1.74 (m, 1H), 1.19 – 1.11 (m, 2H), 0.96 (d, *J* = 8.0 Hz, 3H), 0.89 (d, *J* = 7.1 Hz, 3H).

<sup>13</sup>C NMR (151 MHz, CDCl<sub>3</sub>) δ 204.2, 203.7, 140.2, 133.4, 73.3, 68.8, 65.8, 46.9, 42.8, 33.8, 27.2, 24.3, 24.1, 20.6, 20.0, 14.3.

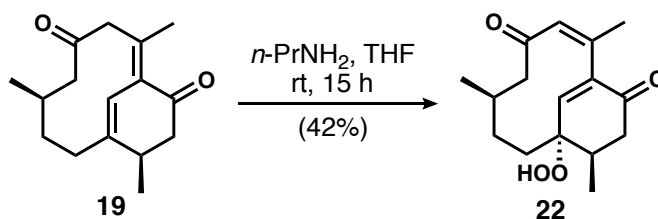

**Hydroperoxide 22:** To a solution of **19** (24 mg, 0.10 mmol, 1.0 equiv.) in anhydrous THF (1.0 mL) at rt was added *n*-propylamine (25  $\mu$ L, 0.30 mmol, 3.0 equiv.). After 15 h a solution of HCl (1.0 M, 1 mL) was added. The resulting mixture was extracted with EtOAc (3 $\times$ 5 mL). The combined organic extracts were washed with brine (5 mL) and dried over MgSO<sub>4</sub>. the volatiles were removed under reduced pressure and purification by flash chromatography (hexanes/EtOAc = 10/1) afforded the product **21** as a colorless solid (12 mg, 42%). In addition to the NMR data provided below, this compound was characterized by X-ray crystallography; the structure and associated data can be found in Section II of this Supporting Information.

**<sup>1</sup>H NMR (500 MHz, CDCl<sub>3</sub>)**  $\delta$  8.21 (s, 1H), 7.06 (s, 1H), 6.00 (s, 1H), 3.04 (td,  $J$  = 13.0, 6.6 Hz, 1H), 2.74 (dd,  $J$  = 18.8, 5.7 Hz, 1H), 2.57 – 2.44 (m, 1H), 2.44 – 2.26 (m, 2H), 2.10 (d,  $J$  = 0.8 Hz, 3H), 1.94 (dd,  $J$  = 16.2, 3.4 Hz, 1H), 1.83 – 1.63 (m, 3H), 1.49 – 1.43 (m, 1H), 1.03 (d,  $J$  = 6.8 Hz, 3H), 0.86 (d,  $J$  = 7.0 Hz, 3H).

**<sup>13</sup>C NMR (126 MHz, CDCl<sub>3</sub>)**  $\delta$  205.2, 195.7, 157.5, 147.9, 140.7, 134.7, 86.5, 47.4, 43.6, 33.1, 28.1, 23.8, 23.8, 21.8, 19.4, 13.9.

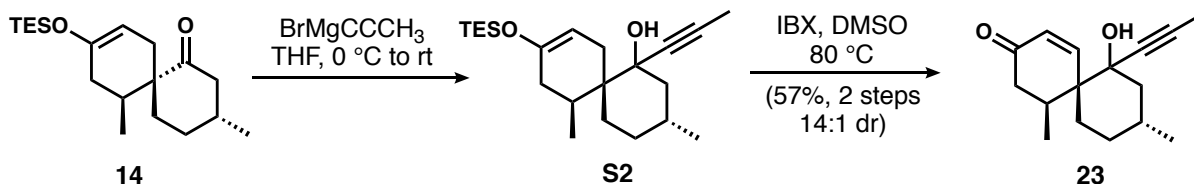

**Propargylic alcohols 23:** To a solution of silyl enol ether (1.1 g, 3.3 mmol, 1.0 equiv.) in anhydrous THF (7.0 mL) at 0 °C was added a solution of propynylmagnesium bromide (0.5 M in THF, 27 mL, 4.0 equiv.). The resulting mixture was stirred for 15 h at room temperature, at which time NaHCO<sub>3</sub> (sat. aq., 10 mL) was added and the resulting mixture was extracted with EtOAc (3 $\times$ 10 mL). The combined organic extracts were washed with brine (10 mL) and dried over MgSO<sub>4</sub>. The volatiles were removed under reduced pressure and the crude reaction product was used as is for the next step.

The crude alcohol **S2**, K<sub>2</sub>CO<sub>3</sub> (0.46 g, 3.3 mmol, 1.0 equiv.) and IBX (1.9 g, 6.6 mmol, 2.0 equiv.) were dissolved in DMSO (33 mL) under an argon atmosphere and heated to 80 °C for 2 h. NaHCO<sub>3</sub> (sat. aq., 50 mL) was added and the resulting mixture was extracted with EtOAc (5 $\times$ 40 mL). The combined organic extracts were washed with brine (20 mL) and dried over MgSO<sub>4</sub>. The volatiles were removed under reduced pressure and purification by flash chromatography (hexanes/EtOAc = 4/1) afforded the desired

product **23** as a mixture of diastereomers (0.46, 57%, dr 14:1) that were separated by careful chromatography in one instance for characterization.

Major diastereomer:  $^1\text{H NMR}$  (500 MHz,  $\text{CDCl}_3$ )  $\delta$  6.56 (dd,  $J = 10.4, 2.0$  Hz, 1H), 6.10 (d,  $J = 10.3$  Hz, 1H), 3.49 (dd,  $J = 17.3, 5.9$  Hz, 1H), 2.63 – 2.50 (m, 1H), 2.16 (s, 1H), 2.06 (d,  $J = 17.3$  Hz, 1H), 1.96 – 1.89 (m, 1H), 1.88 – 1.82 (m, 4H), 1.79 – 1.66 (m, 3H), 1.55 – 1.49 (m, 1H), 0.98 (d,  $J = 2.0$  Hz, 3H), 0.96 (d,  $J = 2.8$  Hz, 3H).

$^{13}\text{C NMR}$  (126 MHz,  $\text{CDCl}_3$ )  $\delta$  200.7, 153.5, 130.0, 83.0, 81.5, 76.0, 45.7, 44.5, 44.5, 33.0, 30.6, 29.6, 28.7, 21.9, 18.4, 3.7.

HRMS (ESI)  $m/z$  calculated for  $\text{C}_{16}\text{H}_{22}\text{O}_2\text{Na}$   $[\text{M}+\text{Na}]^+$  269.1512, found 269.1512

IR (film) 3386, 2922, 2869, 1665  $\text{cm}^{-1}$ .

$[\alpha]_{\text{D}}^{22} = +130.6$  ( $c = 1.0, \text{CHCl}_3$ ).

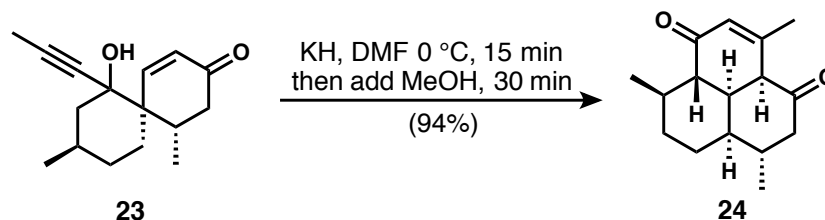

**Tricyclic enone 24**: To a suspension of KH (32.0 mg, 0.80 mmol, 4.0 equiv.) in anhydrous DMF (1.0 mL) at 0 °C was added a solution of the alcohol **23** (50 mg, 0.20 mmol, 1.0 equiv.) in anhydrous DMF (1.0 mL). The color immediately turned into a dark red and after 15 min the color changed to a yellow/brown color. After the color change, methanol (1 mL) was added and stirring was continued for 30 min, at which time water (5 mL) was added and the resulting mixture was extracted with EtOAc (3×10 mL). The combined organic extracts were washed with brine (10 mL) and dried over  $\text{MgSO}_4$ . The volatiles were removed under reduced pressure and purification by flash chromatography (hexanes/EtOAc = 4/1) afforded the desired product **24** as a yellow solid (48 mg, 94%). This compound was characterized by X-ray crystallography; the structure and associated data can be found in Section II.

$^1\text{H NMR}$  (500 MHz,  $\text{CDCl}_3$ )  $\delta$  5.89 (d,  $J = 1.2$  Hz, 1H), 3.22 (d,  $J = 5.7$  Hz, 1H), 2.63 – 2.51 (m, 1H), 2.45 (dd,  $J = 11.9, 3.2$  Hz, 1H), 2.31 – 2.13 (m, 2H), 1.92 (d,  $J = 1.0$  Hz, 3H), 1.91 – 1.87 (m, 1H), 1.87 – 1.79 (m, 2H), 1.77 – 1.62 (m, 1H), 1.59 – 1.49 (m, 1H), 1.45 (tt,  $J = 14.0, 3.7$  Hz, 1H), 1.18 – 1.09 (m, 4H), 1.03 (d,  $J = 6.1$  Hz, 3H).

$^{13}\text{C NMR}$  (126 MHz,  $\text{CDCl}_3$ )  $\delta$  208.8, 200.9, 156.0, 128.6, 57.8, 50.1, 48.4, 47.7, 42.8, 31.4, 31.2, 28.9, 26.1, 23.9, 22.6, 19.7.

IR (film) 2931, 2862, 1708, 1661  $\text{cm}^{-1}$ .

HRMS (ESI)  $m/z$  calculated for  $\text{C}_{16}\text{H}_{22}\text{O}_2\text{Na}$   $[\text{M}+\text{Na}]^+$  269.1512, found 269.1520.

$[\alpha]_{\text{D}}^{22} = -100.3$  ( $c = 1.0, \text{CHCl}_3$ ).

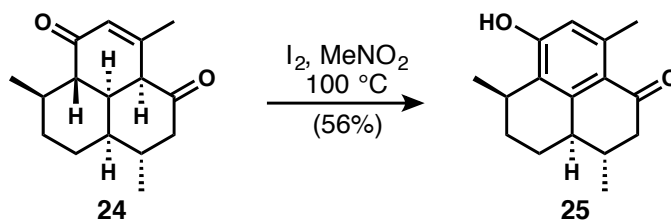

**Phenol 25:** Enone **24** (0.10 g, 0.41 mmol, 1.0 equiv.) and iodine (0.62 g, 2.4 mmol, 6.0 equiv.) were dissolved in anhydrous MeNO<sub>2</sub> (4.0 mL) under an argon atmosphere and heated to 100 °C for 6 h. Na<sub>2</sub>S<sub>2</sub>O<sub>3</sub> (sat. aq., 4 mL) was added and stirring was continued for 30 min. The resulting mixture was extracted with EtOAc (5×5 mL). The combined organic extracts were washed with brine (10 mL) and dried over MgSO<sub>4</sub>. The volatiles were removed under reduced pressure and purification by flash chromatography (hexanes/acetone = 10/1) afforded the desired product as a red solid (56 mg, 56%).

**<sup>1</sup>H NMR (500 MHz, CDCl<sub>3</sub>)** δ 6.55 (s, 1H), 5.81 (s, 1H), 3.25 – 3.05 (m, 1H), 2.71 (dd, *J* = 17.7, 4.3 Hz, 1H), 2.57 (s, 3H), 2.39 – 2.30 (m, 1H), 2.30 – 2.14 (m, 1H), 2.11 – 1.99 (m, 1H), 1.96 – 1.85 (m, 1H), 1.85 – 1.78 (m, 2H), 1.58 – 1.45 (m, 1H), 1.24 (d, *J* = 7.0 Hz, 3H), 1.11 (d, *J* = 6.5 Hz, 3H).

**<sup>13</sup>C NMR (126 MHz, CDCl<sub>3</sub>)** δ 199.8, 157.1, 146.4, 142.0, 125.7, 125.1, 117.5, 49.5, 44.1, 35.7, 29.1, 26.9, 23.7, 22.2, 21.1, 19.4.

**IR (film)** 3137 (br), 2922, 2865, 1628, 1574 cm<sup>-1</sup>.

**HRMS (ESI)** *m/z* calculated for C<sub>16</sub>H<sub>19</sub>O<sub>2</sub> [M-H]<sup>-</sup> 243.1385, found 243.1376.

**[α]<sub>D</sub><sup>22</sup>** = +11.0 (*c* = 1.0, CHCl<sub>3</sub>).

## II. Data from X-ray Crystal Structures

### Definitions:

$$wR2 = [\Sigma[w(F_o^2 - F_c^2)^2] / \Sigma[w(F_o^2)^2]]^{1/2}$$

$$R1 = \Sigma||F_o| - |F_c|| / \Sigma|F_o|$$

Goof =  $S = [\Sigma[w(F_o^2 - F_c^2)^2] / (n-p)]^{1/2}$  where n is the number of reflections and p is the total number of parameters refined.

The thermal ellipsoid plot is shown at the 50% probability level.

### X-ray Data Collection, Structure Solution and Refinement for alcohol 11' (cdv62)

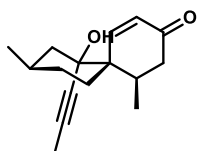

11'

A colorless crystal of approximate dimensions 0.160 x 0.183 x 0.200 mm was mounted in a cryoloop and transferred to a Bruker SMART APEX II diffractometer. The APEX2<sup>4</sup> program package was used to determine the unit-cell parameters and for data collection (45 sec/frame scan time for a sphere of diffraction data). The raw frame data was processed using SAINT<sup>5</sup> and SADABS<sup>6</sup> to yield the reflection data file. Subsequent calculations were carried out using the SHELXTL<sup>7</sup> program. The diffraction symmetry was *mmm* and the systematic absences were consistent with the orthorhombic space group *P2<sub>1</sub>2<sub>1</sub>2<sub>1</sub>* that was later determined to be correct.

The structure was solved by dual space methods and refined on  $F^2$  by full-matrix least-squares techniques. The analytical scattering factors<sup>8</sup> for neutral atoms were used throughout the analysis. Hydrogen atom H(1) was located from a difference-Fourier map and refined (*x,y,z* and  $U_{iso}$ ). The remaining hydrogen atoms were included using a riding model.

Least squares analysis yielded  $wR2 = 0.0889$  and  $Goof = 1.040$  for 170 variables refined against 3419 data (0.73 Å),  $R1 = 0.0391$  for those 3113 data with  $I > 2.0\sigma(I)$ . Due to the absence of any atom heavier than oxygen, the absolute structure could not be assigned by refinement of the Flack parameter<sup>6</sup>.

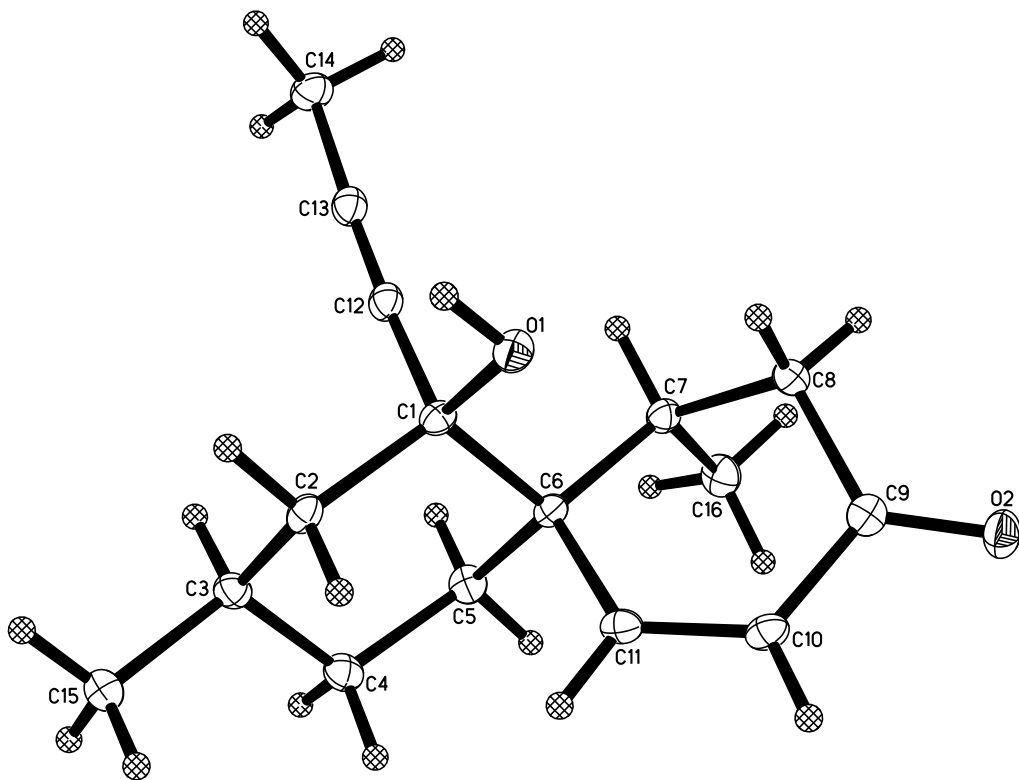

Table 1. Crystal data and structure refinement for cdv62.

|                                         |                                                |          |
|-----------------------------------------|------------------------------------------------|----------|
| Identification code                     | cdv62 (Vincenzo Ramella)                       |          |
| Empirical formula                       | C <sub>16</sub> H <sub>22</sub> O <sub>2</sub> |          |
| Formula weight                          | 246.33                                         |          |
| Temperature                             | 88(2) K                                        |          |
| Wavelength                              | 0.71073 Å                                      |          |
| Crystal system                          | Orthorhombic                                   |          |
| Space group                             | P2 <sub>1</sub> 2 <sub>1</sub> 2 <sub>1</sub>  |          |
| Unit cell dimensions                    | a = 8.2997(8) Å                                | α = 90°. |
|                                         | b = 12.6503(12) Å                              | β = 90°. |
|                                         | c = 12.9757(12) Å                              | γ = 90°. |
| Volume                                  | 1362.4(2) Å <sup>3</sup>                       |          |
| Z                                       | 4                                              |          |
| Density (calculated)                    | 1.201 Mg/m <sup>3</sup>                        |          |
| Absorption coefficient                  | 0.077 mm <sup>-1</sup>                         |          |
| F(000)                                  | 536                                            |          |
| Crystal color                           | colorless                                      |          |
| Crystal size                            | 0.200 x 0.183 x 0.160 mm <sup>3</sup>          |          |
| Theta range for data collection         | 2.248 to 29.131°                               |          |
| Index ranges                            | -11 ≤ h ≤ 10, -17 ≤ k ≤ 17, -17 ≤ l ≤ 17       |          |
| Reflections collected                   | 12526                                          |          |
| Independent reflections                 | 3419 [R(int) = 0.0378]                         |          |
| Completeness to theta = 25.500°         | 100.0 %                                        |          |
| Absorption correction                   | Semi-empirical from equivalents                |          |
| Max. and min. transmission              | 0.8621 and 0.8205                              |          |
| Refinement method                       | Full-matrix least-squares on F <sup>2</sup>    |          |
| Data / restraints / parameters          | 3419 / 0 / 170                                 |          |
| Goodness-of-fit on F <sup>2</sup>       | 1.040                                          |          |
| Final R indices [I > 2σ(I) = 3113 data] | R1 = 0.0391, wR2 = 0.0846                      |          |
| R indices (all data, 0.73 Å)            | R1 = 0.0458, wR2 = 0.0889                      |          |
| Largest diff. peak and hole             | 0.291 and -0.169 e.Å <sup>-3</sup>             |          |



Table 2. Atomic coordinates ( $\times 10^4$ ) and equivalent isotropic displacement parameters ( $\text{\AA}^2 \times 10^3$ ) for cdv62.  $U(\text{eq})$  is defined as one third of the trace of the orthogonalized  $U^{ij}$  tensor.

|       | x       | y       | z       | $U(\text{eq})$ |
|-------|---------|---------|---------|----------------|
| O(1)  | 3128(2) | 5375(1) | 4807(1) | 13(1)          |
| O(2)  | 2233(2) | 3430(1) | 1673(1) | 17(1)          |
| C(1)  | 4712(2) | 4980(1) | 5043(1) | 11(1)          |
| C(2)  | 5866(2) | 5925(1) | 5164(1) | 12(1)          |
| C(3)  | 7624(2) | 5610(2) | 5342(1) | 13(1)          |
| C(4)  | 8174(2) | 4870(2) | 4483(2) | 15(1)          |
| C(5)  | 7034(2) | 3934(2) | 4329(2) | 14(1)          |
| C(6)  | 5243(2) | 4233(1) | 4133(1) | 11(1)          |
| C(7)  | 4180(2) | 3217(2) | 4088(1) | 12(1)          |
| C(8)  | 2574(2) | 3413(2) | 3514(1) | 13(1)          |
| C(9)  | 2909(2) | 3790(1) | 2436(1) | 13(1)          |
| C(10) | 4115(2) | 4631(2) | 2358(1) | 13(1)          |
| C(11) | 5138(2) | 4838(2) | 3125(1) | 12(1)          |
| C(12) | 4633(2) | 4373(2) | 6022(1) | 13(1)          |
| C(13) | 4436(2) | 3916(2) | 6816(2) | 14(1)          |
| C(14) | 4135(2) | 3337(2) | 7781(1) | 17(1)          |
| C(15) | 8682(2) | 6598(2) | 5407(2) | 16(1)          |
| C(16) | 4999(2) | 2255(2) | 3595(2) | 17(1)          |

Table 3. Bond lengths [ $\text{\AA}$ ] and angles [ $^\circ$ ] for cdv62.

---

|                 |            |
|-----------------|------------|
| O(1)-C(1)       | 1.439(2)   |
| O(2)-C(9)       | 1.226(2)   |
| C(1)-C(12)      | 1.485(2)   |
| C(1)-C(2)       | 1.540(3)   |
| C(1)-C(6)       | 1.575(2)   |
| C(2)-C(3)       | 1.530(2)   |
| C(3)-C(4)       | 1.526(3)   |
| C(3)-C(15)      | 1.530(3)   |
| C(4)-C(5)       | 1.529(3)   |
| C(5)-C(6)       | 1.555(2)   |
| C(6)-C(11)      | 1.518(3)   |
| C(6)-C(7)       | 1.560(3)   |
| C(7)-C(16)      | 1.534(3)   |
| C(7)-C(8)       | 1.547(3)   |
| C(8)-C(9)       | 1.504(2)   |
| C(9)-C(10)      | 1.464(3)   |
| C(10)-C(11)     | 1.334(3)   |
| C(12)-C(13)     | 1.193(3)   |
| C(13)-C(14)     | 1.472(3)   |
|                 |            |
| O(1)-C(1)-C(12) | 108.70(15) |
| O(1)-C(1)-C(2)  | 108.67(14) |
| C(12)-C(1)-C(2) | 109.92(15) |
| O(1)-C(1)-C(6)  | 107.74(14) |
| C(12)-C(1)-C(6) | 110.10(15) |
| C(2)-C(1)-C(6)  | 111.62(14) |
| C(3)-C(2)-C(1)  | 114.00(15) |
| C(4)-C(3)-C(15) | 111.71(15) |
| C(4)-C(3)-C(2)  | 109.56(15) |
| C(15)-C(3)-C(2) | 110.08(15) |
| C(3)-C(4)-C(5)  | 112.66(15) |
| C(4)-C(5)-C(6)  | 115.18(15) |
| C(11)-C(6)-C(5) | 108.57(15) |
| C(11)-C(6)-C(7) | 110.56(15) |

|                   |            |
|-------------------|------------|
| C(5)-C(6)-C(7)    | 110.31(14) |
| C(11)-C(6)-C(1)   | 109.08(14) |
| C(5)-C(6)-C(1)    | 106.87(14) |
| C(7)-C(6)-C(1)    | 111.33(15) |
| C(16)-C(7)-C(8)   | 107.97(15) |
| C(16)-C(7)-C(6)   | 114.73(15) |
| C(8)-C(7)-C(6)    | 111.92(15) |
| C(9)-C(8)-C(7)    | 109.84(15) |
| O(2)-C(9)-C(10)   | 121.86(17) |
| O(2)-C(9)-C(8)    | 123.28(16) |
| C(10)-C(9)-C(8)   | 114.85(16) |
| C(11)-C(10)-C(9)  | 121.78(17) |
| C(10)-C(11)-C(6)  | 125.44(17) |
| C(13)-C(12)-C(1)  | 174.4(2)   |
| C(12)-C(13)-C(14) | 177.8(2)   |

---

Table 4. Anisotropic displacement parameters ( $\text{\AA}^2 \times 10^3$ ) for cdv62. The anisotropic displacement factor exponent takes the form:  $-2p^2[ h^2 a^*2U^{11} + \dots + 2 h k a^* b^* U^{12} ]$

|       | U <sup>11</sup> | U <sup>22</sup> | U <sup>33</sup> | U <sup>23</sup> | U <sup>13</sup> | U <sup>12</sup> |
|-------|-----------------|-----------------|-----------------|-----------------|-----------------|-----------------|
| O(1)  | 12(1)           | 15(1)           | 13(1)           | -2(1)           | -1(1)           | 4(1)            |
| O(2)  | 19(1)           | 17(1)           | 14(1)           | 1(1)            | -5(1)           | -1(1)           |
| C(1)  | 11(1)           | 12(1)           | 10(1)           | 0(1)            | 1(1)            | 2(1)            |
| C(2)  | 15(1)           | 10(1)           | 10(1)           | -1(1)           | 0(1)            | 1(1)            |
| C(3)  | 13(1)           | 13(1)           | 12(1)           | 2(1)            | -1(1)           | -1(1)           |
| C(4)  | 11(1)           | 16(1)           | 16(1)           | 0(1)            | 0(1)            | 1(1)            |
| C(5)  | 13(1)           | 12(1)           | 16(1)           | -2(1)           | 1(1)            | 3(1)            |
| C(6)  | 12(1)           | 11(1)           | 9(1)            | 0(1)            | 1(1)            | 0(1)            |
| C(7)  | 15(1)           | 12(1)           | 10(1)           | 1(1)            | 0(1)            | -2(1)           |
| C(8)  | 13(1)           | 14(1)           | 14(1)           | 0(1)            | 1(1)            | -3(1)           |
| C(9)  | 13(1)           | 12(1)           | 14(1)           | 1(1)            | -1(1)           | 3(1)            |
| C(10) | 17(1)           | 11(1)           | 11(1)           | 2(1)            | 2(1)            | 0(1)            |
| C(11) | 15(1)           | 9(1)            | 13(1)           | 0(1)            | 4(1)            | 0(1)            |
| C(12) | 13(1)           | 13(1)           | 13(1)           | -3(1)           | 0(1)            | 1(1)            |
| C(13) | 13(1)           | 14(1)           | 14(1)           | -2(1)           | -1(1)           | 1(1)            |
| C(14) | 19(1)           | 20(1)           | 13(1)           | 4(1)            | 1(1)            | 0(1)            |
| C(15) | 14(1)           | 17(1)           | 16(1)           | -1(1)           | -1(1)           | -3(1)           |
| C(16) | 20(1)           | 12(1)           | 19(1)           | -1(1)           | 0(1)            | -1(1)           |

Table 5. Hydrogen coordinates ( $\times 10^4$ ) and isotropic displacement parameters ( $\text{\AA}^2 \times 10^3$ ) for cdv62.

|        | x        | y        | z        | U(eq) |
|--------|----------|----------|----------|-------|
| H(2A)  | 5803     | 6367     | 4536     | 14    |
| H(2B)  | 5500     | 6362     | 5753     | 14    |
| H(3A)  | 7698     | 5223     | 6013     | 15    |
| H(4A)  | 9264     | 4600     | 4648     | 18    |
| H(4B)  | 8249     | 5273     | 3831     | 18    |
| H(5A)  | 7087     | 3479     | 4949     | 16    |
| H(5B)  | 7424     | 3511     | 3738     | 16    |
| H(7A)  | 3906     | 3022     | 4814     | 15    |
| H(8A)  | 1940     | 2751     | 3490     | 16    |
| H(8B)  | 1934     | 3951     | 3888     | 16    |
| H(10A) | 4171     | 5041     | 1746     | 16    |
| H(11A) | 5861     | 5413     | 3033     | 15    |
| H(14A) | 3436     | 2730     | 7641     | 26    |
| H(14B) | 3608     | 3807     | 8277     | 26    |
| H(14C) | 5160     | 3089     | 8066     | 26    |
| H(15A) | 9815     | 6388     | 5468     | 24    |
| H(15B) | 8373     | 7015     | 6012     | 24    |
| H(15C) | 8537     | 7024     | 4783     | 24    |
| H(16A) | 4243     | 1660     | 3581     | 26    |
| H(16B) | 5951     | 2060     | 4000     | 26    |
| H(16C) | 5327     | 2430     | 2890     | 26    |
| H(1)   | 2900(30) | 5760(20) | 5320(20) | 32(7) |

Table 6. Torsion angles [°] for cdv62.

---

|                       |             |
|-----------------------|-------------|
| O(1)-C(1)-C(2)-C(3)   | -175.91(14) |
| C(12)-C(1)-C(2)-C(3)  | 65.24(19)   |
| C(6)-C(1)-C(2)-C(3)   | -57.2(2)    |
| C(1)-C(2)-C(3)-C(4)   | 54.4(2)     |
| C(1)-C(2)-C(3)-C(15)  | 177.60(15)  |
| C(15)-C(3)-C(4)-C(5)  | -174.05(16) |
| C(2)-C(3)-C(4)-C(5)   | -51.8(2)    |
| C(3)-C(4)-C(5)-C(6)   | 55.0(2)     |
| C(4)-C(5)-C(6)-C(11)  | 63.8(2)     |
| C(4)-C(5)-C(6)-C(7)   | -174.89(15) |
| C(4)-C(5)-C(6)-C(1)   | -53.7(2)    |
| O(1)-C(1)-C(6)-C(11)  | 55.47(18)   |
| C(12)-C(1)-C(6)-C(11) | 173.87(15)  |
| C(2)-C(1)-C(6)-C(11)  | -63.76(19)  |
| O(1)-C(1)-C(6)-C(5)   | 172.67(14)  |
| C(12)-C(1)-C(6)-C(5)  | -68.93(18)  |
| C(2)-C(1)-C(6)-C(5)   | 53.44(18)   |
| O(1)-C(1)-C(6)-C(7)   | -66.80(18)  |
| C(12)-C(1)-C(6)-C(7)  | 51.6(2)     |
| C(2)-C(1)-C(6)-C(7)   | 173.96(15)  |
| C(11)-C(6)-C(7)-C(16) | 84.59(19)   |
| C(5)-C(6)-C(7)-C(16)  | -35.5(2)    |
| C(1)-C(6)-C(7)-C(16)  | -154.00(15) |
| C(11)-C(6)-C(7)-C(8)  | -38.9(2)    |
| C(5)-C(6)-C(7)-C(8)   | -158.99(15) |
| C(1)-C(6)-C(7)-C(8)   | 82.53(18)   |
| C(16)-C(7)-C(8)-C(9)  | -68.83(18)  |
| C(6)-C(7)-C(8)-C(9)   | 58.37(19)   |
| C(7)-C(8)-C(9)-O(2)   | 133.14(18)  |
| C(7)-C(8)-C(9)-C(10)  | -47.0(2)    |
| O(2)-C(9)-C(10)-C(11) | -162.57(18) |
| C(8)-C(9)-C(10)-C(11) | 17.6(3)     |
| C(9)-C(10)-C(11)-C(6) | 2.3(3)      |
| C(5)-C(6)-C(11)-C(10) | 130.20(19)  |

C(7)-C(6)-C(11)-C(10)

9.1(3)

C(1)-C(6)-C(11)-C(10)

-113.7(2)

---

Table 7. Hydrogen bonds for cdv62 [ $\text{\AA}$  and  $^\circ$ ].

| D-H...A            | d(D-H)  | d(H...A) | d(D...A) | $\angle(\text{DHA})$ |
|--------------------|---------|----------|----------|----------------------|
| O(1)-H(1)...O(2)#1 | 0.84(3) | 2.04(3)  | 2.869(2) | 168(3)               |

Symmetry transformations used to generate equivalent atoms:

#1  $-x+1/2, -y+1, z+1/2$



**X-ray Data Collection, Structure Solution and Refinement for tricyclic enone 18 (cdv53).**

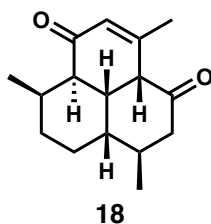

A colorless crystal of approximate dimensions 0.142 x 0.161 x 0.326 mm was mounted on a glass fiber and transferred to a Bruker SMART APEX II diffractometer. The APEX2<sup>4</sup> program package was used to determine the unit-cell parameters and for data collection (30 sec/frame scan time for a sphere of diffraction data). The raw frame data was processed using SAINT<sup>5</sup> and SADABS<sup>6</sup> to yield the reflection data file. Subsequent calculations were carried out using the SHELXTL<sup>7</sup> program. The diffraction symmetry was  $2/m$  and the systematic absences were consistent with the monoclinic space groups  $Cc$  and  $C2/c$ . It was later determined that space group  $C2/c$  was correct.

The structure was solved by direct methods and refined on  $F^2$  by full-matrix least-squares techniques. The analytical scattering factors<sup>8</sup> for neutral atoms were used throughout the analysis. Hydrogen atoms were located from a difference-Fourier map and refined ( $x, y, z$  and  $U_{iso}$ ).

Least-squares analysis yielded  $wR2 = 0.1067$  and  $Goof = 1.046$  for 251 variables refined against 2937 data (0.78 Å),  $R1 = 0.0388$  for those 2474 data with  $I > 2.0\sigma(I)$ .

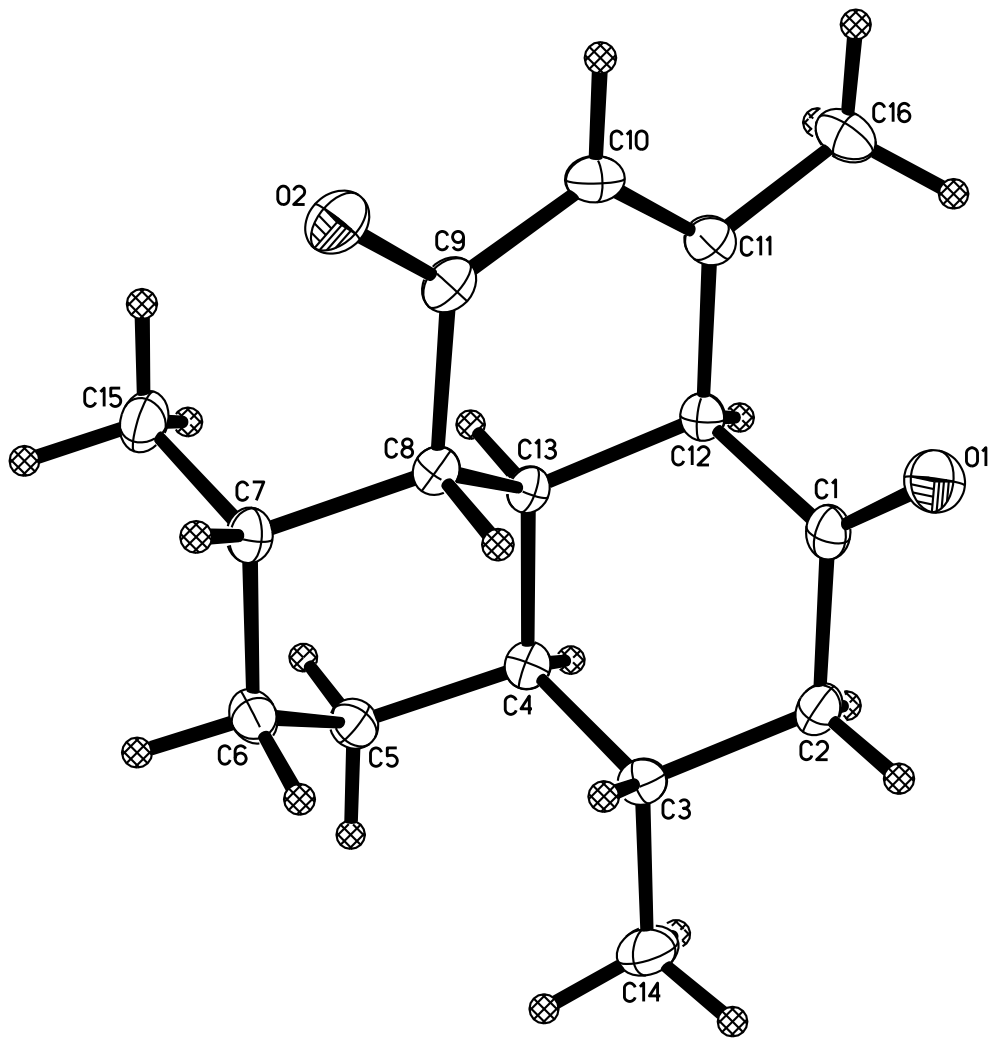

Table 1. Crystal data and structure refinement for cdv53.

|                                         |                                                |                   |
|-----------------------------------------|------------------------------------------------|-------------------|
| Identification code                     | cdv53 (Vincenzo Ramella)                       |                   |
| Empirical formula                       | C <sub>16</sub> H <sub>22</sub> O <sub>2</sub> |                   |
| Formula weight                          | 246.33                                         |                   |
| Temperature                             | 133(2) K                                       |                   |
| Wavelength                              | 0.71073 Å                                      |                   |
| Crystal system                          | Monoclinic                                     |                   |
| Space group                             | C2/c                                           |                   |
| Unit cell dimensions                    | a = 17.6844(13) Å                              | α = 90°.          |
|                                         | b = 14.2786(10) Å                              | β = 107.4578(9)°. |
|                                         | c = 11.0138(8) Å                               | γ = 90°.          |
| Volume                                  | 2653.0(3) Å <sup>3</sup>                       |                   |
| Z                                       | 8                                              |                   |
| Density (calculated)                    | 1.233 Mg/m <sup>3</sup>                        |                   |
| Absorption coefficient                  | 0.079 mm <sup>-1</sup>                         |                   |
| F(000)                                  | 1072                                           |                   |
| Crystal color                           | colorless                                      |                   |
| Crystal size                            | 0.326 x 0.161 x 0.142 mm <sup>3</sup>          |                   |
| Theta range for data collection         | 1.869 to 27.100°                               |                   |
| Index ranges                            | -22 ≤ h ≤ 22, -18 ≤ k ≤ 18, -14 ≤ l ≤ 14       |                   |
| Reflections collected                   | 15111                                          |                   |
| Independent reflections                 | 2937 [R(int) = 0.0254]                         |                   |
| Completeness to theta = 25.500°         | 100.0 %                                        |                   |
| Absorption correction                   | Semi-empirical from equivalents                |                   |
| Max. and min. transmission              | 0.8621 and 0.8151                              |                   |
| Refinement method                       | Full-matrix least-squares on F <sup>2</sup>    |                   |
| Data / restraints / parameters          | 2937 / 0 / 251                                 |                   |
| Goodness-of-fit on F <sup>2</sup>       | 1.046                                          |                   |
| Final R indices [I > 2σ(I) = 2474 data] | R1 = 0.0388, wR2 = 0.0994                      |                   |
| R indices (all data, 0.78 Å)            | R1 = 0.0485, wR2 = 0.1067                      |                   |
| Largest diff. peak and hole             | 0.380 and -0.180 e.Å <sup>-3</sup>             |                   |

Table 2. Atomic coordinates ( $\times 10^4$ ) and equivalent isotropic displacement parameters ( $\text{\AA}^2 \times 10^3$ ) for cdv53.  $U(\text{eq})$  is defined as one third of the trace of the orthogonalized  $U^{ij}$  tensor.

|       | x       | y       | z       | $U(\text{eq})$ |
|-------|---------|---------|---------|----------------|
| O(1)  | 1500(1) | 4081(1) | 4448(1) | 25(1)          |
| O(2)  | 1784(1) | 1329(1) | 1792(1) | 23(1)          |
| C(1)  | 2091(1) | 4239(1) | 4139(1) | 16(1)          |
| C(2)  | 2857(1) | 4555(1) | 5066(1) | 18(1)          |
| C(3)  | 3567(1) | 3949(1) | 5015(1) | 16(1)          |
| C(4)  | 3610(1) | 3914(1) | 3638(1) | 15(1)          |
| C(5)  | 4298(1) | 3321(1) | 3478(1) | 18(1)          |
| C(6)  | 4176(1) | 2272(1) | 3647(1) | 19(1)          |
| C(7)  | 3396(1) | 1909(1) | 2732(1) | 17(1)          |
| C(8)  | 2703(1) | 2508(1) | 2881(1) | 14(1)          |
| C(9)  | 1899(1) | 2163(1) | 2055(1) | 16(1)          |
| C(10) | 1257(1) | 2846(1) | 1615(1) | 18(1)          |
| C(11) | 1335(1) | 3756(1) | 1916(1) | 16(1)          |
| C(12) | 2107(1) | 4137(1) | 2763(1) | 14(1)          |
| C(13) | 2830(1) | 3558(1) | 2697(1) | 13(1)          |
| C(14) | 4319(1) | 4346(1) | 5951(1) | 28(1)          |
| C(15) | 3429(1) | 1868(1) | 1357(1) | 23(1)          |
| C(16) | 675(1)  | 4445(1) | 1442(1) | 23(1)          |

Table 3. Bond lengths [Å] and angles [°] for cdv53.

---

|                 |            |
|-----------------|------------|
| O(1)-C(1)       | 1.2131(14) |
| O(2)-C(9)       | 1.2276(14) |
| C(1)-C(2)       | 1.5006(16) |
| C(1)-C(12)      | 1.5309(15) |
| C(2)-C(3)       | 1.5393(16) |
| C(3)-C(14)      | 1.5261(17) |
| C(3)-C(4)       | 1.5422(15) |
| C(4)-C(5)       | 1.5347(16) |
| C(4)-C(13)      | 1.5429(15) |
| C(5)-C(6)       | 1.5315(17) |
| C(6)-C(7)       | 1.5352(16) |
| C(7)-C(15)      | 1.5343(16) |
| C(7)-C(8)       | 1.5429(16) |
| C(8)-C(9)       | 1.5226(16) |
| C(8)-C(13)      | 1.5378(15) |
| C(9)-C(10)      | 1.4641(16) |
| C(10)-C(11)     | 1.3377(17) |
| C(11)-C(16)     | 1.4972(16) |
| C(11)-C(12)     | 1.5050(16) |
| C(12)-C(13)     | 1.5414(15) |
| <br>            |            |
| O(1)-C(1)-C(2)  | 122.84(10) |
| O(1)-C(1)-C(12) | 122.22(10) |
| C(2)-C(1)-C(12) | 114.94(9)  |
| C(1)-C(2)-C(3)  | 112.66(9)  |
| C(14)-C(3)-C(2) | 108.77(10) |
| C(14)-C(3)-C(4) | 112.67(10) |
| C(2)-C(3)-C(4)  | 109.62(9)  |
| C(5)-C(4)-C(3)  | 113.94(9)  |
| C(5)-C(4)-C(13) | 108.69(9)  |
| C(3)-C(4)-C(13) | 111.88(9)  |
| C(6)-C(5)-C(4)  | 112.42(9)  |
| C(5)-C(6)-C(7)  | 112.45(10) |
| C(15)-C(7)-C(6) | 111.58(10) |

|                   |            |
|-------------------|------------|
| C(15)-C(7)-C(8)   | 113.10(10) |
| C(6)-C(7)-C(8)    | 109.18(9)  |
| C(9)-C(8)-C(13)   | 112.55(9)  |
| C(9)-C(8)-C(7)    | 112.71(9)  |
| C(13)-C(8)-C(7)   | 112.06(9)  |
| O(2)-C(9)-C(10)   | 120.73(11) |
| O(2)-C(9)-C(8)    | 120.87(11) |
| C(10)-C(9)-C(8)   | 118.37(10) |
| C(11)-C(10)-C(9)  | 123.48(11) |
| C(10)-C(11)-C(16) | 122.67(11) |
| C(10)-C(11)-C(12) | 120.82(10) |
| C(16)-C(11)-C(12) | 116.51(10) |
| C(11)-C(12)-C(1)  | 111.44(9)  |
| C(11)-C(12)-C(13) | 112.79(9)  |
| C(1)-C(12)-C(13)  | 111.06(9)  |
| C(8)-C(13)-C(12)  | 111.16(9)  |
| C(8)-C(13)-C(4)   | 111.67(9)  |
| C(12)-C(13)-C(4)  | 112.27(9)  |

---

Table 4. Anisotropic displacement parameters ( $\text{\AA}^2 \times 10^3$ ) for cdv53. The anisotropic displacement factor exponent takes the form:  $-2\pi^2 [ h^2 a^{*2} U^{11} + \dots + 2 h k a^* b^* U^{12} ]$

|       | U <sup>11</sup> | U <sup>22</sup> | U <sup>33</sup> | U <sup>23</sup> | U <sup>13</sup> | U <sup>12</sup> |
|-------|-----------------|-----------------|-----------------|-----------------|-----------------|-----------------|
| O(1)  | 20(1)           | 37(1)           | 21(1)           | 1(1)            | 10(1)           | -1(1)           |
| O(2)  | 26(1)           | 16(1)           | 27(1)           | -5(1)           | 6(1)            | -5(1)           |
| C(1)  | 20(1)           | 12(1)           | 17(1)           | 2(1)            | 7(1)            | 4(1)            |
| C(2)  | 22(1)           | 18(1)           | 14(1)           | -2(1)           | 7(1)            | 1(1)            |
| C(3)  | 17(1)           | 16(1)           | 15(1)           | -1(1)           | 4(1)            | -1(1)           |
| C(4)  | 16(1)           | 13(1)           | 16(1)           | 0(1)            | 6(1)            | -2(1)           |
| C(5)  | 15(1)           | 20(1)           | 20(1)           | -1(1)           | 6(1)            | -1(1)           |
| C(6)  | 17(1)           | 18(1)           | 22(1)           | 0(1)            | 6(1)            | 3(1)            |
| C(7)  | 19(1)           | 13(1)           | 19(1)           | -1(1)           | 6(1)            | 2(1)            |
| C(8)  | 16(1)           | 12(1)           | 13(1)           | 1(1)            | 5(1)            | -1(1)           |
| C(9)  | 21(1)           | 16(1)           | 14(1)           | 0(1)            | 7(1)            | -2(1)           |
| C(10) | 16(1)           | 21(1)           | 16(1)           | 0(1)            | 2(1)            | -3(1)           |
| C(11) | 16(1)           | 19(1)           | 13(1)           | 4(1)            | 5(1)            | 1(1)            |
| C(12) | 16(1)           | 12(1)           | 14(1)           | 2(1)            | 5(1)            | 1(1)            |
| C(13) | 16(1)           | 12(1)           | 12(1)           | 1(1)            | 6(1)            | 0(1)            |
| C(14) | 21(1)           | 38(1)           | 21(1)           | -9(1)           | 2(1)            | -4(1)           |
| C(15) | 25(1)           | 23(1)           | 23(1)           | -5(1)           | 11(1)           | 1(1)            |
| C(16) | 18(1)           | 23(1)           | 26(1)           | 4(1)            | 2(1)            | 3(1)            |

Table 5. Hydrogen coordinates ( $\times 10^4$ ) and isotropic displacement parameters ( $\text{\AA}^2 \times 10^3$ ) for cdv53.

|        | x        | y        | z        | U(eq) |
|--------|----------|----------|----------|-------|
| H(2A)  | 2796(9)  | 4546(11) | 5910(15) | 27(4) |
| H(2B)  | 2966(8)  | 5188(11) | 4822(14) | 24(4) |
| H(3A)  | 3493(8)  | 3306(10) | 5306(13) | 18(3) |
| H(4A)  | 3684(8)  | 4561(10) | 3401(13) | 17(3) |
| H(5A)  | 4341(8)  | 3433(10) | 2626(14) | 21(3) |
| H(5B)  | 4815(9)  | 3520(10) | 4093(14) | 21(4) |
| H(6A)  | 4190(8)  | 2150(10) | 4534(14) | 21(4) |
| H(6B)  | 4621(9)  | 1916(11) | 3505(14) | 25(4) |
| H(7A)  | 3308(9)  | 1277(10) | 2992(14) | 20(3) |
| H(8A)  | 2679(8)  | 2414(10) | 3770(13) | 17(3) |
| H(10A) | 759(9)   | 2604(11) | 1087(14) | 26(4) |
| H(12A) | 2178(8)  | 4787(10) | 2502(12) | 16(3) |
| H(13A) | 2865(7)  | 3661(9)  | 1819(12) | 10(3) |
| H(14A) | 4784(11) | 3952(12) | 6043(16) | 38(4) |
| H(14B) | 4244(9)  | 4419(11) | 6788(16) | 33(4) |
| H(14C) | 4425(10) | 4974(13) | 5652(17) | 42(5) |
| H(15A) | 3857(10) | 1423(12) | 1288(16) | 39(4) |
| H(15B) | 3542(9)  | 2493(12) | 1037(15) | 32(4) |
| H(15C) | 2924(10) | 1639(12) | 778(16)  | 31(4) |
| H(16A) | 177(11)  | 4134(12) | 1014(17) | 41(5) |
| H(16B) | 816(9)   | 4866(11) | 834(15)  | 31(4) |
| H(16C) | 617(9)   | 4837(11) | 2150(15) | 29(4) |



Table 6. Torsion angles [°] for cdv53.

---

|                         |             |
|-------------------------|-------------|
| O(1)-C(1)-C(2)-C(3)     | 127.98(12)  |
| C(12)-C(1)-C(2)-C(3)    | -52.48(13)  |
| C(1)-C(2)-C(3)-C(14)    | 177.88(10)  |
| C(1)-C(2)-C(3)-C(4)     | 54.29(12)   |
| C(14)-C(3)-C(4)-C(5)    | 59.06(13)   |
| C(2)-C(3)-C(4)-C(5)     | -179.67(9)  |
| C(14)-C(3)-C(4)-C(13)   | -177.16(10) |
| C(2)-C(3)-C(4)-C(13)    | -55.89(12)  |
| C(3)-C(4)-C(5)-C(6)     | 69.72(13)   |
| C(13)-C(4)-C(5)-C(6)    | -55.78(12)  |
| C(4)-C(5)-C(6)-C(7)     | 56.59(13)   |
| C(5)-C(6)-C(7)-C(15)    | 71.56(12)   |
| C(5)-C(6)-C(7)-C(8)     | -54.20(13)  |
| C(15)-C(7)-C(8)-C(9)    | 58.12(13)   |
| C(6)-C(7)-C(8)-C(9)     | -177.00(9)  |
| C(15)-C(7)-C(8)-C(13)   | -70.06(12)  |
| C(6)-C(7)-C(8)-C(13)    | 54.82(12)   |
| C(13)-C(8)-C(9)-O(2)    | 158.55(10)  |
| C(7)-C(8)-C(9)-O(2)     | 30.62(14)   |
| C(13)-C(8)-C(9)-C(10)   | -23.43(13)  |
| C(7)-C(8)-C(9)-C(10)    | -151.35(10) |
| O(2)-C(9)-C(10)-C(11)   | 177.00(11)  |
| C(8)-C(9)-C(10)-C(11)   | -1.02(17)   |
| C(9)-C(10)-C(11)-C(16)  | 179.12(11)  |
| C(9)-C(10)-C(11)-C(12)  | -0.92(17)   |
| C(10)-C(11)-C(12)-C(1)  | -98.57(12)  |
| C(16)-C(11)-C(12)-C(1)  | 81.38(12)   |
| C(10)-C(11)-C(12)-C(13) | 27.15(14)   |
| C(16)-C(11)-C(12)-C(13) | -152.89(10) |
| O(1)-C(1)-C(12)-C(11)   | -4.32(15)   |
| C(2)-C(1)-C(12)-C(11)   | 176.15(10)  |
| O(1)-C(1)-C(12)-C(13)   | -130.99(11) |
| C(2)-C(1)-C(12)-C(13)   | 49.47(12)   |
| C(9)-C(8)-C(13)-C(12)   | 48.03(12)   |

|                        |            |
|------------------------|------------|
| C(7)-C(8)-C(13)-C(12)  | 176.29(9)  |
| C(9)-C(8)-C(13)-C(4)   | 174.25(9)  |
| C(7)-C(8)-C(13)-C(4)   | -57.48(12) |
| C(11)-C(12)-C(13)-C(8) | -50.12(12) |
| C(1)-C(12)-C(13)-C(8)  | 75.81(11)  |
| C(11)-C(12)-C(13)-C(4) | -176.01(9) |
| C(1)-C(12)-C(13)-C(4)  | -50.08(12) |
| C(5)-C(4)-C(13)-C(8)   | 56.17(11)  |
| C(3)-C(4)-C(13)-C(8)   | -70.52(12) |
| C(5)-C(4)-C(13)-C(12)  | -178.21(9) |
| C(3)-C(4)-C(13)-C(12)  | 55.10(12)  |

---

**X-ray Data Collection, Structure Solution and Refinement for bicyclic dienedione 20 (cdv 50).**

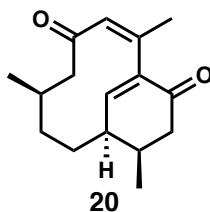

A colorless crystal of approximate dimensions 0.238 x 0.287 x 0.299 mm was mounted on a glass fiber and transferred to a Bruker SMART APEX II diffractometer. The APEX2<sup>4</sup> program package was used to determine the unit-cell parameters and for data collection (20 sec/frame scan time for a sphere of diffraction data). The raw frame data was processed using SAINT<sup>5</sup> and SADABS<sup>6</sup> to yield the reflection data file. Subsequent calculations were carried out using the SHELXTL<sup>7</sup> program. The diffraction symmetry was  $2/m$  and the systematic absences were consistent with the monoclinic space group  $P2_1/n$  that was later determined to be correct.

The structure was solved by direct methods and refined on  $F^2$  by full-matrix least-squares techniques. The analytical scattering factors<sup>8</sup> for neutral atoms were used throughout the analysis. Hydrogen atoms were located from a difference-Fourier map and refined ( $x, y, z$  and  $U_{iso}$ ).

Least-squares analysis yielded  $wR2 = 0.0959$  and  $Goof = 1.049$  for 251 variables refined against 3450 data (0.73 Å),  $R1 = 0.0364$  for those 3066 data with  $I > 2.0\sigma(I)$ .

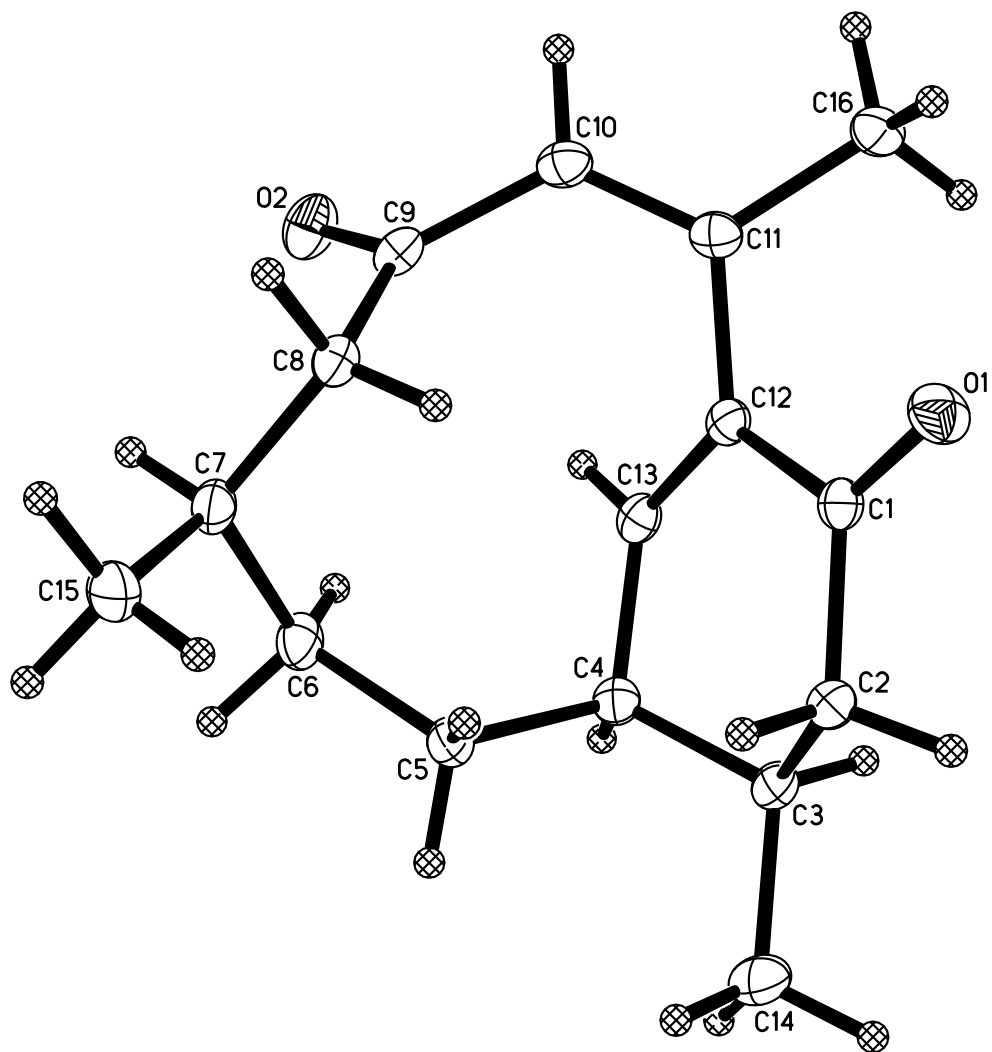

Table 1. Crystal data and structure refinement for cdv50.

|                                         |                                                           |                               |
|-----------------------------------------|-----------------------------------------------------------|-------------------------------|
| Identification code                     | cdv50 (Vincenzo Ramella)                                  |                               |
| Empirical formula                       | C <sub>16</sub> H <sub>22</sub> O <sub>2</sub>            |                               |
| Formula weight                          | 246.33                                                    |                               |
| Temperature                             | 88(2) K                                                   |                               |
| Wavelength                              | 0.71073 Å                                                 |                               |
| Crystal system                          | Monoclinic                                                |                               |
| Space group                             | <i>P</i> 2 <sub>1</sub> / <i>n</i>                        |                               |
| Unit cell dimensions                    | a = 14.1975(5) Å                                          | $\alpha = 90^\circ$ .         |
|                                         | b = 6.6489(2) Å                                           | $\beta = 109.0023(4)^\circ$ . |
|                                         | c = 15.1788(6) Å                                          | $\gamma = 90^\circ$ .         |
| Volume                                  | 1354.76(8) Å <sup>3</sup>                                 |                               |
| Z                                       | 4                                                         |                               |
| Density (calculated)                    | 1.208 Mg/m <sup>3</sup>                                   |                               |
| Absorption coefficient                  | 0.078 mm <sup>-1</sup>                                    |                               |
| F(000)                                  | 536                                                       |                               |
| Crystal color                           | colorless                                                 |                               |
| Crystal size                            | 0.299 x 0.287 x 0.238 mm <sup>3</sup>                     |                               |
| Theta range for data collection         | 1.707 to 29.157°                                          |                               |
| Index ranges                            | -18 ≤ <i>h</i> ≤ 19, -8 <i>k</i> ≤ 9, -20 ≤ <i>l</i> ≤ 19 |                               |
| Reflections collected                   | 16200                                                     |                               |
| Independent reflections                 | 3450 [R(int) = 0.0163]                                    |                               |
| Completeness to theta = 25.500°         | 100.0 %                                                   |                               |
| Absorption correction                   | Semi-empirical from equivalents                           |                               |
| Max. and min. transmission              | 0.8621 and 0.8470                                         |                               |
| Refinement method                       | Full-matrix least-squares on F <sup>2</sup>               |                               |
| Data / restraints / parameters          | 3450 / 0 / 251                                            |                               |
| Goodness-of-fit on F <sup>2</sup>       | 1.049                                                     |                               |
| Final R indices [I > 2σ(I) = 3066 data] | R1 = 0.0364, wR2 = 0.0912                                 |                               |
| R indices (all data, 0.73 Å)            | R1 = 0.0419, wR2 = 0.0959                                 |                               |
| Largest diff. peak and hole             | 0.362 and -0.174 e.Å <sup>-3</sup>                        |                               |

Table 2. Atomic coordinates ( $\times 10^4$ ) and equivalent isotropic displacement parameters ( $\text{\AA}^2 \times 10^3$ ) for cdv50.  $U(\text{eq})$  is defined as one third of the trace of the orthogonalized  $U^{ij}$  tensor.

|       | x       | y        | z       | $U(\text{eq})$ |
|-------|---------|----------|---------|----------------|
| O(1)  | 6207(1) | 306(1)   | 974(1)  | 21(1)          |
| O(2)  | 6131(1) | 7183(1)  | 3496(1) | 24(1)          |
| C(1)  | 5532(1) | 832(1)   | 1258(1) | 14(1)          |
| C(2)  | 4777(1) | -660(1)  | 1371(1) | 15(1)          |
| C(3)  | 3780(1) | 256(2)   | 1346(1) | 16(1)          |
| C(4)  | 3952(1) | 2045(2)  | 2023(1) | 15(1)          |
| C(5)  | 4343(1) | 1435(2)  | 3068(1) | 17(1)          |
| C(6)  | 4646(1) | 3227(2)  | 3754(1) | 19(1)          |
| C(7)  | 5766(1) | 3435(2)  | 4312(1) | 18(1)          |
| C(8)  | 6447(1) | 3663(2)  | 3715(1) | 15(1)          |
| C(9)  | 6335(1) | 5617(2)  | 3174(1) | 16(1)          |
| C(10) | 6579(1) | 5680(2)  | 2288(1) | 17(1)          |
| C(11) | 6213(1) | 4464(1)  | 1548(1) | 15(1)          |
| C(12) | 5444(1) | 2949(1)  | 1544(1) | 13(1)          |
| C(13) | 4678(1) | 3480(1)  | 1837(1) | 15(1)          |
| C(14) | 3087(1) | -1345(2) | 1520(1) | 25(1)          |
| C(15) | 6124(1) | 1682(2)  | 4995(1) | 24(1)          |
| C(16) | 6512(1) | 4704(2)  | 686(1)  | 20(1)          |

Table 3. Bond lengths [Å] and angles [°] for cdv50.

---

|              |            |
|--------------|------------|
| O(1)-C(1)    | 1.2225(12) |
| O(2)-C(9)    | 1.2248(12) |
| C(1)-C(12)   | 1.4908(13) |
| C(1)-C(2)    | 1.5114(13) |
| C(2)-C(3)    | 1.5306(13) |
| C(2)-H(2A)   | 0.989(13)  |
| C(2)-H(2B)   | 0.983(14)  |
| C(3)-C(14)   | 1.5298(14) |
| C(3)-C(4)    | 1.5387(13) |
| C(3)-H(3A)   | 0.987(13)  |
| C(4)-C(13)   | 1.4977(13) |
| C(4)-C(5)    | 1.5538(13) |
| C(4)-H(4A)   | 0.999(13)  |
| C(5)-C(6)    | 1.5486(14) |
| C(5)-H(5A)   | 0.977(13)  |
| C(5)-H(5B)   | 0.984(13)  |
| C(6)-C(7)    | 1.5452(14) |
| C(6)-H(6A)   | 1.006(13)  |
| C(6)-H(6B)   | 0.997(13)  |
| C(7)-C(15)   | 1.5321(15) |
| C(7)-C(8)    | 1.5334(13) |
| C(7)-H(7A)   | 0.987(13)  |
| C(8)-C(9)    | 1.5174(13) |
| C(8)-H(8A)   | 0.995(13)  |
| C(8)-H(8B)   | 0.984(12)  |
| C(9)-C(10)   | 1.4939(14) |
| C(10)-C(11)  | 1.3434(14) |
| C(10)-H(10A) | 0.959(14)  |
| C(11)-C(12)  | 1.4844(13) |
| C(11)-C(16)  | 1.5090(13) |
| C(12)-C(13)  | 1.3484(13) |
| C(13)-H(13A) | 0.966(13)  |
| C(14)-H(14A) | 0.987(15)  |
| C(14)-H(14B) | 0.989(15)  |

|              |           |
|--------------|-----------|
| C(14)-H(14C) | 1.001(15) |
| C(15)-H(15A) | 1.002(15) |
| C(15)-H(15B) | 0.988(15) |
| C(15)-H(15C) | 0.994(15) |
| C(16)-H(16A) | 0.981(16) |
| C(16)-H(16B) | 0.968(18) |
| C(16)-H(16C) | 0.967(18) |

|                  |           |
|------------------|-----------|
| O(1)-C(1)-C(12)  | 121.53(9) |
| O(1)-C(1)-C(2)   | 121.26(9) |
| C(12)-C(1)-C(2)  | 117.16(8) |
| C(1)-C(2)-C(3)   | 114.87(8) |
| C(1)-C(2)-H(2A)  | 105.3(8)  |
| C(3)-C(2)-H(2A)  | 109.7(7)  |
| C(1)-C(2)-H(2B)  | 107.8(8)  |
| C(3)-C(2)-H(2B)  | 111.0(8)  |
| H(2A)-C(2)-H(2B) | 107.9(11) |
| C(14)-C(3)-C(2)  | 111.12(9) |
| C(14)-C(3)-C(4)  | 113.15(8) |
| C(2)-C(3)-C(4)   | 110.26(8) |
| C(14)-C(3)-H(3A) | 107.9(7)  |
| C(2)-C(3)-H(3A)  | 107.2(7)  |
| C(4)-C(3)-H(3A)  | 107.0(7)  |
| C(13)-C(4)-C(3)  | 109.62(8) |
| C(13)-C(4)-C(5)  | 108.60(7) |
| C(3)-C(4)-C(5)   | 113.98(8) |
| C(13)-C(4)-H(4A) | 108.1(7)  |
| C(3)-C(4)-H(4A)  | 109.0(7)  |
| C(5)-C(4)-H(4A)  | 107.3(7)  |
| C(6)-C(5)-C(4)   | 114.51(8) |
| C(6)-C(5)-H(5A)  | 109.1(8)  |
| C(4)-C(5)-H(5A)  | 106.9(8)  |
| C(6)-C(5)-H(5B)  | 109.7(8)  |
| C(4)-C(5)-H(5B)  | 108.7(7)  |
| H(5A)-C(5)-H(5B) | 107.6(11) |
| C(7)-C(6)-C(5)   | 116.65(8) |



|                     |           |
|---------------------|-----------|
| C(7)-C(6)-H(6A)     | 109.4(7)  |
| C(5)-C(6)-H(6A)     | 109.6(7)  |
| C(7)-C(6)-H(6B)     | 106.7(8)  |
| C(5)-C(6)-H(6B)     | 108.2(8)  |
| H(6A)-C(6)-H(6B)    | 105.8(11) |
| C(15)-C(7)-C(8)     | 109.91(8) |
| C(15)-C(7)-C(6)     | 111.03(9) |
| C(8)-C(7)-C(6)      | 114.75(8) |
| C(15)-C(7)-H(7A)    | 109.0(7)  |
| C(8)-C(7)-H(7A)     | 106.1(8)  |
| C(6)-C(7)-H(7A)     | 105.7(8)  |
| C(9)-C(8)-C(7)      | 115.49(8) |
| C(9)-C(8)-H(8A)     | 102.6(8)  |
| C(7)-C(8)-H(8A)     | 108.5(7)  |
| C(9)-C(8)-H(8B)     | 111.1(7)  |
| C(7)-C(8)-H(8B)     | 111.6(7)  |
| H(8A)-C(8)-H(8B)    | 106.7(10) |
| O(2)-C(9)-C(10)     | 119.29(9) |
| O(2)-C(9)-C(8)      | 120.57(9) |
| C(10)-C(9)-C(8)     | 119.85(8) |
| C(11)-C(10)-C(9)    | 126.61(9) |
| C(11)-C(10)-H(10A)  | 119.7(8)  |
| C(9)-C(10)-H(10A)   | 113.5(8)  |
| C(10)-C(11)-C(12)   | 119.64(9) |
| C(10)-C(11)-C(16)   | 121.36(9) |
| C(12)-C(11)-C(16)   | 118.84(8) |
| C(13)-C(12)-C(11)   | 119.51(8) |
| C(13)-C(12)-C(1)    | 119.76(8) |
| C(11)-C(12)-C(1)    | 120.68(8) |
| C(12)-C(13)-C(4)    | 125.05(9) |
| C(12)-C(13)-H(13A)  | 117.8(8)  |
| C(4)-C(13)-H(13A)   | 117.0(7)  |
| C(3)-C(14)-H(14A)   | 110.7(9)  |
| C(3)-C(14)-H(14B)   | 111.4(8)  |
| H(14A)-C(14)-H(14B) | 107.6(12) |
| C(3)-C(14)-H(14C)   | 111.5(9)  |

|                     |           |
|---------------------|-----------|
| H(14A)-C(14)-H(14C) | 107.7(12) |
| H(14B)-C(14)-H(14C) | 107.9(12) |
| C(7)-C(15)-H(15A)   | 109.9(9)  |
| C(7)-C(15)-H(15B)   | 111.8(8)  |
| H(15A)-C(15)-H(15B) | 108.2(12) |
| C(7)-C(15)-H(15C)   | 111.0(9)  |
| H(15A)-C(15)-H(15C) | 107.9(12) |
| H(15B)-C(15)-H(15C) | 108.0(12) |
| C(11)-C(16)-H(16A)  | 111.0(9)  |
| C(11)-C(16)-H(16B)  | 111.0(10) |
| H(16A)-C(16)-H(16B) | 109.2(13) |
| C(11)-C(16)-H(16C)  | 111.7(10) |
| H(16A)-C(16)-H(16C) | 106.1(13) |
| H(16B)-C(16)-H(16C) | 107.7(14) |

---

Table 4. Anisotropic displacement parameters ( $\text{\AA}^2 \times 10^3$ ) for cdv50. The anisotropic displacement factor exponent takes the form:  $-2\pi^2 [ h^2 a^{*2} U^{11} + \dots + 2 h k a^* b^* U^{12} ]$

|       | U <sup>11</sup> | U <sup>22</sup> | U <sup>33</sup> | U <sup>23</sup> | U <sup>13</sup> | U <sup>12</sup> |
|-------|-----------------|-----------------|-----------------|-----------------|-----------------|-----------------|
| O(1)  | 20(1)           | 21(1)           | 25(1)           | -1(1)           | 12(1)           | 2(1)            |
| O(2)  | 29(1)           | 17(1)           | 23(1)           | -5(1)           | 5(1)            | 2(1)            |
| C(1)  | 14(1)           | 16(1)           | 11(1)           | 1(1)            | 2(1)            | 1(1)            |
| C(2)  | 17(1)           | 14(1)           | 16(1)           | -2(1)           | 6(1)            | -1(1)           |
| C(3)  | 14(1)           | 19(1)           | 14(1)           | -2(1)           | 3(1)            | -3(1)           |
| C(4)  | 12(1)           | 18(1)           | 15(1)           | 0(1)            | 3(1)            | 1(1)            |
| C(5)  | 15(1)           | 21(1)           | 15(1)           | -1(1)           | 5(1)            | -2(1)           |
| C(6)  | 16(1)           | 25(1)           | 17(1)           | -5(1)           | 7(1)            | 1(1)            |
| C(7)  | 18(1)           | 21(1)           | 14(1)           | -4(1)           | 5(1)            | -1(1)           |
| C(8)  | 14(1)           | 16(1)           | 14(1)           | -1(1)           | 3(1)            | 0(1)            |
| C(9)  | 14(1)           | 16(1)           | 16(1)           | -2(1)           | 1(1)            | -2(1)           |
| C(10) | 17(1)           | 15(1)           | 19(1)           | 2(1)            | 4(1)            | -2(1)           |
| C(11) | 15(1)           | 14(1)           | 17(1)           | 3(1)            | 4(1)            | 0(1)            |
| C(12) | 14(1)           | 13(1)           | 11(1)           | 1(1)            | 2(1)            | 0(1)            |
| C(13) | 15(1)           | 14(1)           | 12(1)           | 0(1)            | 1(1)            | 1(1)            |
| C(14) | 20(1)           | 28(1)           | 29(1)           | -6(1)           | 9(1)            | -10(1)          |
| C(15) | 22(1)           | 32(1)           | 15(1)           | 3(1)            | 4(1)            | -5(1)           |
| C(16) | 23(1)           | 22(1)           | 18(1)           | 2(1)            | 7(1)            | -5(1)           |

Table 5. Hydrogen coordinates ( $\times 10^4$ ) and isotropic displacement parameters ( $\text{\AA}^2 \times 10^3$ ) for cdv50.

|        | x        | y         | z        | U(eq) |
|--------|----------|-----------|----------|-------|
| H(2A)  | 5099(10) | -1300(20) | 1983(9)  | 21(3) |
| H(2B)  | 4682(10) | -1700(20) | 888(9)   | 23(3) |
| H(3A)  | 3462(9)  | 796(19)   | 712(9)   | 18(3) |
| H(4A)  | 3308(10) | 2771(19)  | 1915(9)  | 19(3) |
| H(5A)  | 3810(10) | 680(20)   | 3193(9)  | 23(3) |
| H(5B)  | 4913(10) | 521(19)   | 3167(9)  | 21(3) |
| H(6A)  | 4398(10) | 4520(20)  | 3412(9)  | 20(3) |
| H(6B)  | 4291(10) | 3090(20)  | 4220(9)  | 25(3) |
| H(7A)  | 5829(10) | 4700(20)  | 4669(9)  | 21(3) |
| H(8A)  | 7149(10) | 3720(20)  | 4135(9)  | 22(3) |
| H(8B)  | 6398(9)  | 2495(19)  | 3305(8)  | 15(3) |
| H(10A) | 7001(10) | 6780(20)  | 2256(9)  | 22(3) |
| H(13A) | 4617(9)  | 4880(20)  | 1979(9)  | 19(3) |
| H(14A) | 2465(11) | -730(20)  | 1548(10) | 34(4) |
| H(14B) | 2903(11) | -2360(20) | 1017(10) | 33(4) |
| H(14C) | 3406(11) | -2060(20) | 2124(10) | 33(4) |
| H(15A) | 5707(11) | 1590(20)  | 5415(11) | 34(4) |
| H(15B) | 6079(11) | 380(20)   | 4667(10) | 28(4) |
| H(15C) | 6828(11) | 1880(20)  | 5393(10) | 33(4) |
| H(16A) | 5935(12) | 4550(20)  | 119(11)  | 37(4) |
| H(16B) | 6813(12) | 6010(30)  | 676(11)  | 46(4) |
| H(16C) | 6986(13) | 3690(30)  | 651(12)  | 51(5) |

Table 6. Torsion angles [°] for cdv50.

---

|                         |             |
|-------------------------|-------------|
| O(1)-C(1)-C(2)-C(3)     | -156.55(9)  |
| C(12)-C(1)-C(2)-C(3)    | 26.02(11)   |
| C(1)-C(2)-C(3)-C(14)    | -176.82(8)  |
| C(1)-C(2)-C(3)-C(4)     | -50.53(11)  |
| C(14)-C(3)-C(4)-C(13)   | 176.94(8)   |
| C(2)-C(3)-C(4)-C(13)    | 51.80(10)   |
| C(14)-C(3)-C(4)-C(5)    | 54.99(11)   |
| C(2)-C(3)-C(4)-C(5)     | -70.15(10)  |
| C(13)-C(4)-C(5)-C(6)    | 50.13(10)   |
| C(3)-C(4)-C(5)-C(6)     | 172.64(8)   |
| C(4)-C(5)-C(6)-C(7)     | -112.60(10) |
| C(5)-C(6)-C(7)-C(15)    | -66.50(11)  |
| C(5)-C(6)-C(7)-C(8)     | 58.88(12)   |
| C(15)-C(7)-C(8)-C(9)    | -166.07(8)  |
| C(6)-C(7)-C(8)-C(9)     | 67.97(11)   |
| C(7)-C(8)-C(9)-O(2)     | 33.59(13)   |
| C(7)-C(8)-C(9)-C(10)    | -152.75(8)  |
| O(2)-C(9)-C(10)-C(11)   | -132.90(11) |
| C(8)-C(9)-C(10)-C(11)   | 53.36(14)   |
| C(9)-C(10)-C(11)-C(12)  | 3.84(15)    |
| C(9)-C(10)-C(11)-C(16)  | 179.26(9)   |
| C(10)-C(11)-C(12)-C(13) | 44.09(13)   |
| C(16)-C(11)-C(12)-C(13) | -131.44(10) |
| C(10)-C(11)-C(12)-C(1)  | -133.41(10) |
| C(16)-C(11)-C(12)-C(1)  | 51.06(12)   |
| O(1)-C(1)-C(12)-C(13)   | 178.77(9)   |
| C(2)-C(1)-C(12)-C(13)   | -3.81(12)   |
| O(1)-C(1)-C(12)-C(11)   | -3.75(13)   |
| C(2)-C(1)-C(12)-C(11)   | 173.67(8)   |
| C(11)-C(12)-C(13)-C(4)  | -169.13(8)  |
| C(1)-C(12)-C(13)-C(4)   | 8.39(13)    |
| C(3)-C(4)-C(13)-C(12)   | -33.18(12)  |
| C(5)-C(4)-C(13)-C(12)   | 91.94(11)   |

---

### X-ray Data Collection, Structure Solution and Refinement for hydroperoxide 21 (cdv52).

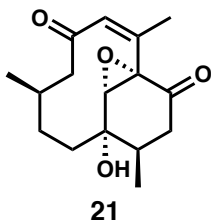

A colorless crystal of approximate dimensions 0.081 x 0.117 x 0.174 mm was mounted in a cryoloop and transferred to a Bruker SMART APEX II diffractometer. The APEX2<sup>4</sup> program package was used to determine the unit-cell parameters and for data collection (120 sec/frame scan time for a sphere of diffraction data). The raw frame data was processed using SAINT<sup>5</sup> and SADABS<sup>6</sup> to yield the reflection data file. Subsequent calculations were carried out using the SHELXTL<sup>7</sup> program. The diffraction symmetry was *mmm* and the systematic absences were consistent with the orthorhombic space group *P*2<sub>1</sub>2<sub>1</sub>2<sub>1</sub> that was later determined to be correct.

The structure was solved by dual space methods and refined on  $F^2$  by full-matrix least-squares techniques. The analytical scattering factors<sup>8</sup> for neutral atoms were used throughout the analysis. Hydrogen atom H(2) was located from a difference-Fourier map and refined (*x*,*y*,*z* and  $U_{\text{iso}}$ ). The remaining hydrogen atoms were included using a riding model.

Least squares analysis yielded  $wR2 = 0.0828$  and  $Goof = 1.036$  for 188 variables refined against 2940 data (0.80 Å),  $R1 = 0.0405$  for those 2420 data with  $I > 2.0\sigma(I)$ . Due to the lack of any atom heavier than oxygen, the absolute structure could not be assigned by refinement of the Flack parameter<sup>6</sup>.

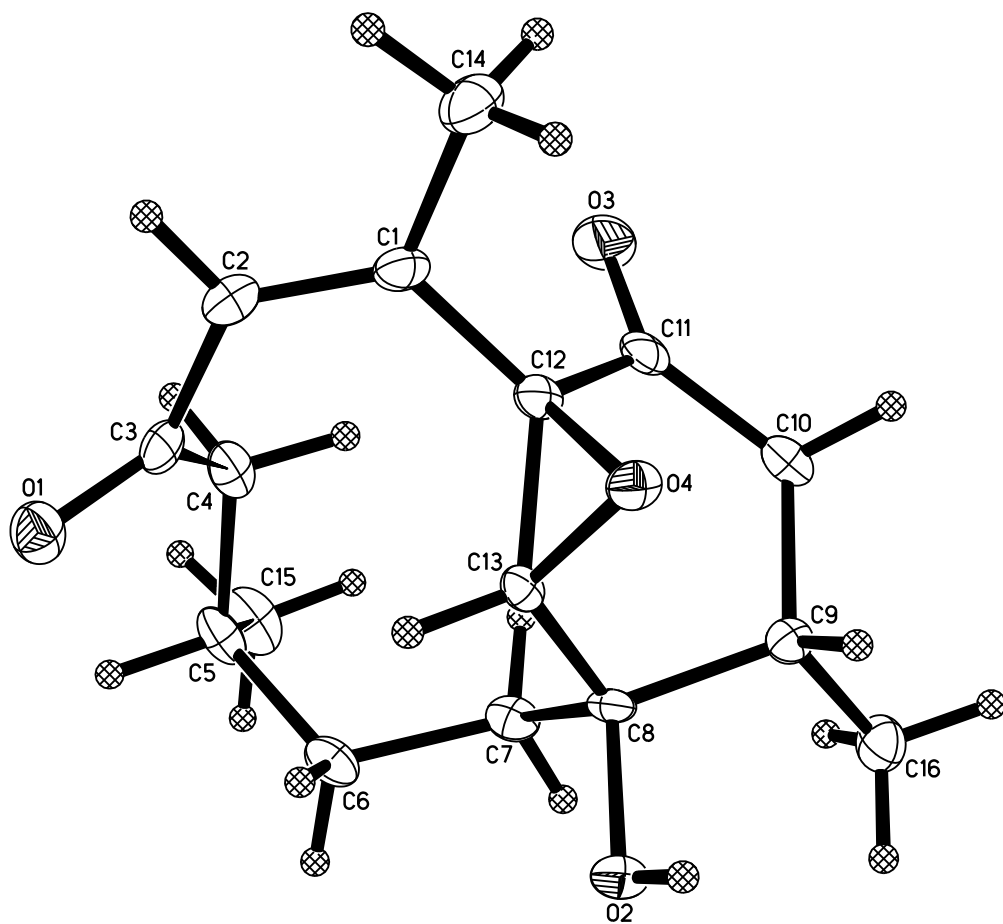

Table 1. Crystal data and structure refinement for cdv52.

|                                         |                                                |          |
|-----------------------------------------|------------------------------------------------|----------|
| Identification code                     | cdv52 (Vincenzo Ramella)                       |          |
| Empirical formula                       | C <sub>16</sub> H <sub>22</sub> O <sub>4</sub> |          |
| Formula weight                          | 278.33                                         |          |
| Temperature                             | 88(2) K                                        |          |
| Wavelength                              | 0.71073 Å                                      |          |
| Crystal system                          | Orthorhombic                                   |          |
| Space group                             | P2 <sub>1</sub> 2 <sub>1</sub> 2 <sub>1</sub>  |          |
| Unit cell dimensions                    | a = 8.3509(9) Å                                | a = 90°. |
|                                         | b = 11.8006(13) Å                              | b = 90°. |
|                                         | c = 14.6529(16) Å                              | g = 90°. |
| Volume                                  | 1444.0(3) Å <sup>3</sup>                       |          |
| Z                                       | 4                                              |          |
| Density (calculated)                    | 1.280 Mg/m <sup>3</sup>                        |          |
| Absorption coefficient                  | 0.091 mm <sup>-1</sup>                         |          |
| F(000)                                  | 600                                            |          |
| Crystal color                           | colorless                                      |          |
| Crystal size                            | 0.174 x 0.117 x 0.081 mm <sup>3</sup>          |          |
| Theta range for data collection         | 2.216 to 26.307°                               |          |
| Index ranges                            | -10 ≤ h ≤ 10, -14 ≤ k ≤ 14, -18 ≤ l ≤ 18       |          |
| Reflections collected                   | 15903                                          |          |
| Independent reflections                 | 2940 [R(int) = 0.0634]                         |          |
| Completeness to theta = 25.500°         | 100.0 %                                        |          |
| Absorption correction                   | Semi-empirical from equivalents                |          |
| Max. and min. transmission              | 0.8620 and 0.8307                              |          |
| Refinement method                       | Full-matrix least-squares on F <sup>2</sup>    |          |
| Data / restraints / parameters          | 2940 / 0 / 188                                 |          |
| Goodness-of-fit on F <sup>2</sup>       | 1.036                                          |          |
| Final R indices [I > 2σ(I) = 2420 data] | R1 = 0.0405, wR2 = 0.0765                      |          |
| R indices (all data, 0.80 Å)            | R1 = 0.0582, wR2 = 0.0828                      |          |
| Largest diff. peak and hole             | 0.204 and -0.177 e.Å <sup>-3</sup>             |          |



Table 2. Atomic coordinates ( $\times 10^4$ ) and equivalent isotropic displacement parameters ( $\text{\AA}^2 \times 10^3$ ) for cdv52.  $U(\text{eq})$  is defined as one third of the trace of the orthogonalized  $U^{ij}$  tensor.

|       | x       | y       | z        | $U(\text{eq})$ |
|-------|---------|---------|----------|----------------|
| O(1)  | 70(2)   | 3750(1) | 1426(1)  | 22(1)          |
| O(2)  | 3625(2) | 3486(2) | -1507(1) | 18(1)          |
| O(3)  | 6247(2) | 5014(2) | 1602(1)  | 26(1)          |
| O(4)  | 5102(2) | 2531(1) | 393(1)   | 15(1)          |
| C(1)  | 4084(3) | 3154(2) | 1886(2)  | 16(1)          |
| C(2)  | 2570(3) | 3391(2) | 2110(2)  | 20(1)          |
| C(3)  | 1428(3) | 4096(2) | 1571(2)  | 18(1)          |
| C(4)  | 1937(3) | 5277(2) | 1306(2)  | 19(1)          |
| C(5)  | 1146(3) | 5777(2) | 451(2)   | 19(1)          |
| C(6)  | 1636(3) | 5177(2) | -438(2)  | 18(1)          |
| C(7)  | 3455(3) | 5198(2) | -655(2)  | 17(1)          |
| C(8)  | 4283(3) | 4046(2) | -718(2)  | 13(1)          |
| C(9)  | 6118(3) | 4134(2) | -817(2)  | 14(1)          |
| C(10) | 6924(3) | 4578(2) | 61(2)    | 17(1)          |
| C(11) | 6042(3) | 4404(2) | 945(2)   | 16(1)          |
| C(12) | 4789(3) | 3496(2) | 983(2)   | 14(1)          |
| C(13) | 3901(3) | 3334(2) | 109(2)   | 12(1)          |
| C(14) | 5171(4) | 2456(2) | 2474(2)  | 24(1)          |
| C(15) | 1469(4) | 7055(2) | 404(2)   | 28(1)          |
| C(16) | 6667(3) | 4821(2) | -1639(2) | 22(1)          |

Table 3. Bond lengths [ $\text{\AA}$ ] and angles [ $^\circ$ ] for cdv52.

---

|                  |           |
|------------------|-----------|
| O(1)-C(3)        | 1.224(3)  |
| O(2)-C(8)        | 1.441(3)  |
| O(3)-C(11)       | 1.215(3)  |
| O(4)-C(13)       | 1.442(3)  |
| O(4)-C(12)       | 1.454(3)  |
| C(1)-C(2)        | 1.335(4)  |
| C(1)-C(14)       | 1.499(4)  |
| C(1)-C(12)       | 1.503(4)  |
| C(2)-C(3)        | 1.492(4)  |
| C(3)-C(4)        | 1.508(4)  |
| C(4)-C(5)        | 1.535(4)  |
| C(5)-C(15)       | 1.533(4)  |
| C(5)-C(6)        | 1.538(4)  |
| C(6)-C(7)        | 1.552(3)  |
| C(7)-C(8)        | 1.528(4)  |
| C(8)-C(13)       | 1.508(3)  |
| C(8)-C(9)        | 1.543(3)  |
| C(9)-C(16)       | 1.521(3)  |
| C(9)-C(10)       | 1.544(4)  |
| C(10)-C(11)      | 1.504(4)  |
| C(11)-C(12)      | 1.498(4)  |
| C(12)-C(13)      | 1.492(3)  |
| <br>             |           |
| C(13)-O(4)-C(12) | 62.04(15) |
| C(2)-C(1)-C(14)  | 123.2(3)  |
| C(2)-C(1)-C(12)  | 122.1(3)  |
| C(14)-C(1)-C(12) | 114.6(2)  |
| C(1)-C(2)-C(3)   | 126.3(3)  |
| O(1)-C(3)-C(2)   | 119.9(2)  |
| O(1)-C(3)-C(4)   | 121.6(2)  |
| C(2)-C(3)-C(4)   | 118.1(2)  |
| C(3)-C(4)-C(5)   | 116.4(2)  |
| C(15)-C(5)-C(4)  | 109.8(2)  |
| C(15)-C(5)-C(6)  | 111.6(2)  |

|                   |            |
|-------------------|------------|
| C(4)-C(5)-C(6)    | 113.6(2)   |
| C(5)-C(6)-C(7)    | 115.2(2)   |
| C(8)-C(7)-C(6)    | 116.2(2)   |
| O(2)-C(8)-C(13)   | 108.03(19) |
| O(2)-C(8)-C(7)    | 106.5(2)   |
| C(13)-C(8)-C(7)   | 110.6(2)   |
| O(2)-C(8)-C(9)    | 109.5(2)   |
| C(13)-C(8)-C(9)   | 108.9(2)   |
| C(7)-C(8)-C(9)    | 113.3(2)   |
| C(16)-C(9)-C(8)   | 114.2(2)   |
| C(16)-C(9)-C(10)  | 110.4(2)   |
| C(8)-C(9)-C(10)   | 112.2(2)   |
| C(11)-C(10)-C(9)  | 117.2(2)   |
| O(3)-C(11)-C(12)  | 119.5(2)   |
| O(3)-C(11)-C(10)  | 122.2(2)   |
| C(12)-C(11)-C(10) | 118.2(2)   |
| O(4)-C(12)-C(13)  | 58.57(15)  |
| O(4)-C(12)-C(11)  | 114.4(2)   |
| C(13)-C(12)-C(11) | 113.9(2)   |
| O(4)-C(12)-C(1)   | 112.6(2)   |
| C(13)-C(12)-C(1)  | 121.7(2)   |
| C(11)-C(12)-C(1)  | 119.9(2)   |
| O(4)-C(13)-C(12)  | 59.39(15)  |
| O(4)-C(13)-C(8)   | 116.8(2)   |
| C(12)-C(13)-C(8)  | 120.9(2)   |

---

Table 4. Anisotropic displacement parameters ( $\text{\AA}^2 \times 10^3$ ) for cdv52. The anisotropic displacement factor exponent takes the form:  $-2p^2[ h^2 a^*2U^{11} + \dots + 2 h k a^* b^* U^{12} ]$

|       | U <sup>11</sup> | U <sup>22</sup> | U <sup>33</sup> | U <sup>23</sup> | U <sup>13</sup> | U <sup>12</sup> |
|-------|-----------------|-----------------|-----------------|-----------------|-----------------|-----------------|
| O(1)  | 19(1)           | 22(1)           | 25(1)           | -5(1)           | 2(1)            | 2(1)            |
| O(2)  | 19(1)           | 19(1)           | 15(1)           | -2(1)           | -4(1)           | -1(1)           |
| O(3)  | 26(1)           | 29(1)           | 24(1)           | -11(1)          | -5(1)           | -2(1)           |
| O(4)  | 19(1)           | 13(1)           | 14(1)           | -2(1)           | -1(1)           | 4(1)            |
| C(1)  | 20(1)           | 18(1)           | 11(1)           | -3(1)           | -2(1)           | 1(1)            |
| C(2)  | 23(2)           | 24(2)           | 13(1)           | -1(1)           | 2(1)            | 0(1)            |
| C(3)  | 17(1)           | 23(1)           | 14(1)           | -7(1)           | 5(1)            | 3(1)            |
| C(4)  | 14(1)           | 18(1)           | 26(2)           | -11(1)          | 0(1)            | 2(1)            |
| C(5)  | 12(1)           | 13(1)           | 32(2)           | -4(1)           | -4(1)           | 1(1)            |
| C(6)  | 16(1)           | 14(1)           | 23(1)           | 3(1)            | -5(1)           | 1(1)            |
| C(7)  | 19(1)           | 14(1)           | 18(1)           | 4(1)            | -4(1)           | -2(1)           |
| C(8)  | 14(1)           | 16(1)           | 10(1)           | 0(1)            | -4(1)           | -2(1)           |
| C(9)  | 16(1)           | 13(1)           | 14(1)           | 1(1)            | 0(1)            | 1(1)            |
| C(10) | 14(1)           | 14(1)           | 23(2)           | 0(1)            | -5(1)           | 1(1)            |
| C(11) | 14(1)           | 17(1)           | 18(1)           | -1(1)           | -5(1)           | 6(1)            |
| C(12) | 15(1)           | 13(1)           | 14(1)           | -3(1)           | -2(1)           | 6(1)            |
| C(13) | 11(1)           | 10(1)           | 15(1)           | -2(1)           | -1(1)           | 2(1)            |
| C(14) | 29(2)           | 25(2)           | 18(1)           | 4(1)            | 3(1)            | 7(1)            |
| C(15) | 24(2)           | 16(1)           | 45(2)           | -4(1)           | -3(2)           | 4(1)            |
| C(16) | 18(2)           | 25(2)           | 22(2)           | 5(1)            | 3(1)            | -2(1)           |

Table 5. Hydrogen coordinates ( $\times 10^4$ ) and isotropic displacement parameters ( $\text{\AA}^2 \times 10^3$ ) for cdv52.

|        | x        | y        | z         | U(eq) |
|--------|----------|----------|-----------|-------|
| H(2)   | 4090(40) | 2830(30) | -1560(20) | 32(9) |
| H(2A)  | 2183     | 3080     | 2666      | 24    |
| H(4A)  | 3111     | 5274     | 1210      | 23    |
| H(4B)  | 1713     | 5789     | 1826      | 23    |
| H(5A)  | -37      | 5676     | 521       | 23    |
| H(6A)  | 1056     | 5537     | -952      | 21    |
| H(6B)  | 1282     | 4378     | -405      | 21    |
| H(7A)  | 3610     | 5598     | -1242     | 20    |
| H(7B)  | 3999     | 5648     | -177      | 20    |
| H(9A)  | 6522     | 3345     | -912      | 17    |
| H(10A) | 7985     | 4210     | 116       | 21    |
| H(10B) | 7113     | 5401     | -15       | 21    |
| H(13A) | 2764     | 3079     | 167       | 14    |
| H(14A) | 5596     | 1821     | 2118      | 36    |
| H(14B) | 4570     | 2164     | 2998      | 36    |
| H(14C) | 6059     | 2927     | 2691      | 36    |
| H(15A) | 932      | 7374     | -132      | 42    |
| H(15B) | 2625     | 7187     | 357       | 42    |
| H(15C) | 1058     | 7419     | 957       | 42    |
| H(16A) | 6158     | 4523     | -2192     | 33    |
| H(16B) | 7833     | 4765     | -1698     | 33    |
| H(16C) | 6362     | 5616     | -1556     | 33    |

Table 6. Torsion angles [°] for cdv52.

---

|                         |             |
|-------------------------|-------------|
| C(14)-C(1)-C(2)-C(3)    | 178.7(3)    |
| C(12)-C(1)-C(2)-C(3)    | -6.2(4)     |
| C(1)-C(2)-C(3)-O(1)     | 132.2(3)    |
| C(1)-C(2)-C(3)-C(4)     | -54.2(4)    |
| O(1)-C(3)-C(4)-C(5)     | -32.1(4)    |
| C(2)-C(3)-C(4)-C(5)     | 154.4(2)    |
| C(3)-C(4)-C(5)-C(15)    | 166.4(2)    |
| C(3)-C(4)-C(5)-C(6)     | -67.9(3)    |
| C(15)-C(5)-C(6)-C(7)    | 65.1(3)     |
| C(4)-C(5)-C(6)-C(7)     | -59.6(3)    |
| C(5)-C(6)-C(7)-C(8)     | 118.9(2)    |
| C(6)-C(7)-C(8)-O(2)     | 66.6(3)     |
| C(6)-C(7)-C(8)-C(13)    | -50.5(3)    |
| C(6)-C(7)-C(8)-C(9)     | -173.0(2)   |
| O(2)-C(8)-C(9)-C(16)    | 61.2(3)     |
| C(13)-C(8)-C(9)-C(16)   | 179.2(2)    |
| C(7)-C(8)-C(9)-C(16)    | -57.4(3)    |
| O(2)-C(8)-C(9)-C(10)    | -172.27(19) |
| C(13)-C(8)-C(9)-C(10)   | -54.3(3)    |
| C(7)-C(8)-C(9)-C(10)    | 69.1(3)     |
| C(16)-C(9)-C(10)-C(11)  | 152.9(2)    |
| C(8)-C(9)-C(10)-C(11)   | 24.4(3)     |
| C(9)-C(10)-C(11)-O(3)   | -154.6(2)   |
| C(9)-C(10)-C(11)-C(12)  | 21.0(3)     |
| C(13)-O(4)-C(12)-C(11)  | -104.2(2)   |
| C(13)-O(4)-C(12)-C(1)   | 114.4(2)    |
| O(3)-C(11)-C(12)-O(4)   | -153.2(2)   |
| C(10)-C(11)-C(12)-O(4)  | 31.0(3)     |
| O(3)-C(11)-C(12)-C(13)  | 141.9(2)    |
| C(10)-C(11)-C(12)-C(13) | -33.8(3)    |
| O(3)-C(11)-C(12)-C(1)   | -14.9(4)    |
| C(10)-C(11)-C(12)-C(1)  | 169.4(2)    |
| C(2)-C(1)-C(12)-O(4)    | -110.7(3)   |
| C(14)-C(1)-C(12)-O(4)   | 64.8(3)     |

|                        |             |
|------------------------|-------------|
| C(2)-C(1)-C(12)-C(13)  | -44.7(4)    |
| C(14)-C(1)-C(12)-C(13) | 130.8(3)    |
| C(2)-C(1)-C(12)-C(11)  | 110.4(3)    |
| C(14)-C(1)-C(12)-C(11) | -74.1(3)    |
| C(12)-O(4)-C(13)-C(8)  | 111.7(2)    |
| C(11)-C(12)-C(13)-O(4) | 104.9(2)    |
| C(1)-C(12)-C(13)-O(4)  | -98.7(2)    |
| O(4)-C(12)-C(13)-C(8)  | -104.9(2)   |
| C(11)-C(12)-C(13)-C(8) | 0.1(3)      |
| C(1)-C(12)-C(13)-C(8)  | 156.5(2)    |
| O(2)-C(8)-C(13)-O(4)   | 93.8(2)     |
| C(7)-C(8)-C(13)-O(4)   | -150.10(19) |
| C(9)-C(8)-C(13)-O(4)   | -25.1(3)    |
| O(2)-C(8)-C(13)-C(12)  | 162.5(2)    |
| C(7)-C(8)-C(13)-C(12)  | -81.4(3)    |
| C(9)-C(8)-C(13)-C(12)  | 43.7(3)     |

---

Table 7. Hydrogen bonds for cdv52 [ $\text{\AA}$  and  $^\circ$ ].

| D-H...A            | d(D-H)  | d(H...A) | d(D...A) | $\angle(\text{DHA})$ |
|--------------------|---------|----------|----------|----------------------|
| O(2)-H(2)...O(1)#1 | 0.86(3) | 2.05(3)  | 2.905(3) | 169(3)               |

Symmetry transformations used to generate equivalent atoms:

#1  $x+1/2, -y+1/2, -z$



**X-ray Data Collection, Structure Solution and Refinement for hydroperoxide 22 (cdv49).**

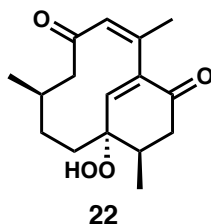

A colorless crystal of approximate dimensions 0.262 x 0.290 x 0.454 mm was mounted in on a glass fiber and transferred to a Bruker SMART APEX II diffractometer. The APEX2<sup>4</sup> program package was used to determine the unit-cell parameters and for data collection (10 sec/frame scan time for a sphere of diffraction data). The raw frame data was processed using SAINT<sup>5</sup> and SADABS<sup>6</sup> to yield the reflection data file. Subsequent calculations were carried out using the SHELXTL<sup>7</sup> program. There were no systematic absences nor any diffraction symmetry other than the Friedel condition. The centrosymmetric triclinic space group  $P\bar{1}$  was assigned and later determined to be correct.

The structure was solved by direct methods and refined on  $F^2$  by full-matrix least-squares techniques. The analytical scattering factors<sup>8</sup> for neutral atoms were used throughout the analysis. Hydrogen atoms were located from a difference-Fourier map and refined ( $x, y, z$  and  $U_{iso}$ ).

Least-squares analysis yielded  $wR2 = 0.0997$  and  $Goof = 1.036$  for 269 variables refined against 3509 data (0.74 Å),  $R1 = 0.0375$  for those 3162 data with  $I > 2.0\sigma(I)$ .

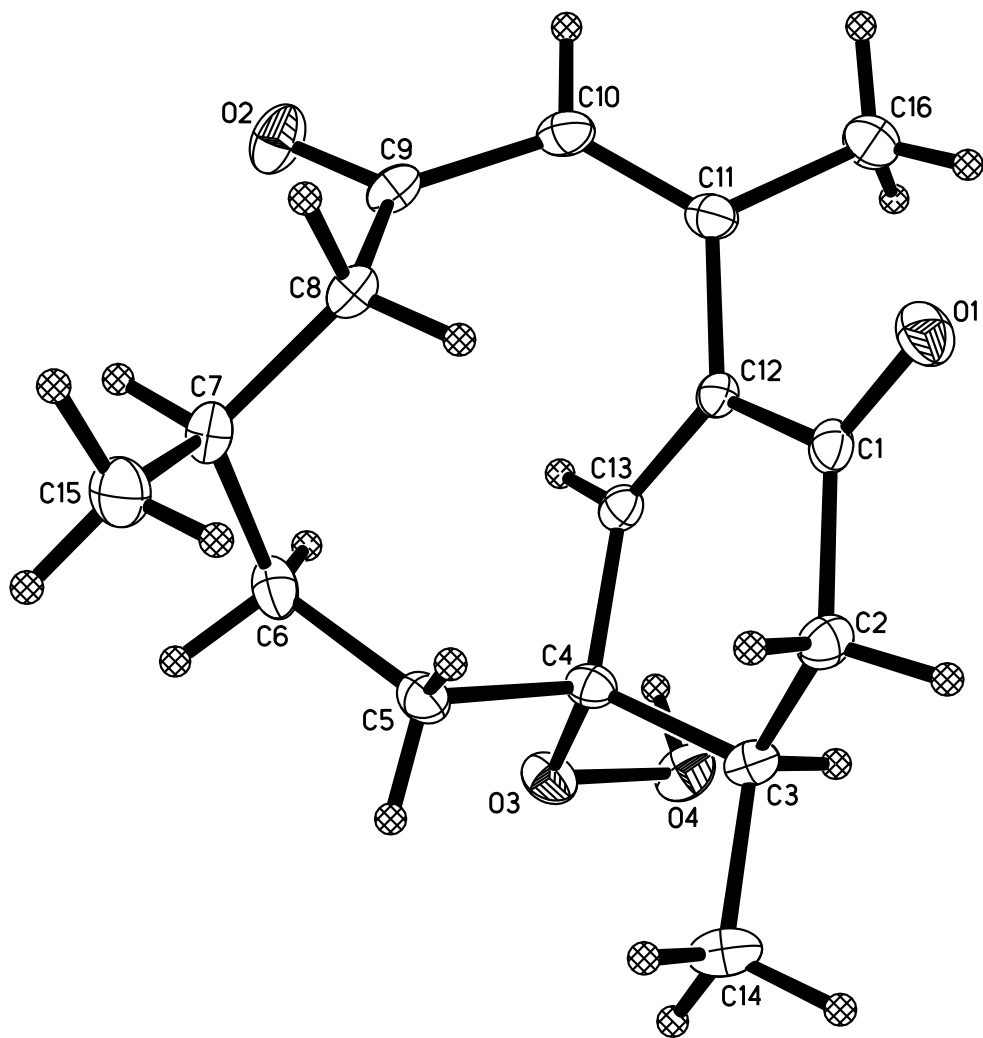

Table 1. Crystal data and structure refinement for cdv49.

|                                         |                                                               |                               |
|-----------------------------------------|---------------------------------------------------------------|-------------------------------|
| Identification code                     | cdv49 (Vincenzo Ramella)                                      |                               |
| Empirical formula                       | C <sub>16</sub> H <sub>22</sub> O <sub>4</sub>                |                               |
| Formula weight                          | 278.33                                                        |                               |
| Temperature                             | 133(2) K                                                      |                               |
| Wavelength                              | 0.71073 Å                                                     |                               |
| Crystal system                          | Triclinic                                                     |                               |
| Space group                             | <i>P</i> $\bar{1}$                                            |                               |
| Unit cell dimensions                    | a = 9.3233(7) Å                                               | $\alpha = 81.7916(9)^\circ$ . |
|                                         | b = 9.3480(7) Å                                               | $\beta = 66.0140(8)^\circ$ .  |
|                                         | c = 9.6872(7) Å                                               | $\gamma = 73.6845(9)^\circ$ . |
| Volume                                  | 739.92(10) Å <sup>3</sup>                                     |                               |
| Z                                       | 2                                                             |                               |
| Density (calculated)                    | 1.249 Mg/m <sup>3</sup>                                       |                               |
| Absorption coefficient                  | 0.089 mm <sup>-1</sup>                                        |                               |
| F(000)                                  | 300                                                           |                               |
| Crystal color                           | colorless                                                     |                               |
| Crystal size                            | 0.454 x 0.290 x 0.262 mm <sup>3</sup>                         |                               |
| Theta range for data collection         | 2.271 to 28.782°                                              |                               |
| Index ranges                            | -12 ≤ <i>h</i> ≤ 12, -12 ≤ <i>k</i> ≤ 12, -12 ≤ <i>l</i> ≤ 12 |                               |
| Reflections collected                   | 8940                                                          |                               |
| Independent reflections                 | 3509 [R(int) = 0.0158]                                        |                               |
| Completeness to theta = 25.500°         | 99.7 %                                                        |                               |
| Absorption correction                   | Semi-empirical from equivalents                               |                               |
| Max. and min. transmission              | 0.8621 and 0.8220                                             |                               |
| Refinement method                       | Full-matrix least-squares on F <sup>2</sup>                   |                               |
| Data / restraints / parameters          | 3509 / 0 / 269                                                |                               |
| Goodness-of-fit on F <sup>2</sup>       | 1.036                                                         |                               |
| Final R indices [I > 2σ(I) = 3162 data] | R1 = 0.0375, wR2 = 0.0959                                     |                               |
| R indices (all data, 0.74 Å)            | R1 = 0.0414, wR2 = 0.0997                                     |                               |
| Largest diff. peak and hole             | 0.409 and -0.183 e.Å <sup>-3</sup>                            |                               |

Table 2. Atomic coordinates ( $\times 10^4$ ) and equivalent isotropic displacement parameters ( $\text{\AA}^2 \times 10^3$ ) for cdv49.  $U(\text{eq})$  is defined as one third of the trace of the orthogonalized  $U^{ij}$  tensor.

|       | x        | y       | z       | $U(\text{eq})$ |
|-------|----------|---------|---------|----------------|
| O(1)  | 9844(1)  | 1070(1) | 6278(1) | 22(1)          |
| O(2)  | 3901(1)  | 2607(1) | 5194(1) | 24(1)          |
| O(3)  | 9142(1)  | 5280(1) | 1877(1) | 19(1)          |
| O(4)  | 9252(1)  | 6387(1) | 2737(1) | 23(1)          |
| C(1)  | 9744(1)  | 1947(1) | 5241(1) | 15(1)          |
| C(2)  | 11189(1) | 1984(1) | 3779(1) | 18(1)          |
| C(3)  | 11040(1) | 3390(1) | 2767(1) | 17(1)          |
| C(4)  | 9378(1)  | 3838(1) | 2638(1) | 15(1)          |
| C(5)  | 9201(1)  | 2811(1) | 1635(1) | 18(1)          |
| C(6)  | 7455(1)  | 2979(1) | 1759(1) | 20(1)          |
| C(7)  | 6748(1)  | 1613(1) | 2442(1) | 18(1)          |
| C(8)  | 6608(1)  | 1204(1) | 4079(1) | 16(1)          |
| C(9)  | 5245(1)  | 2222(1) | 5265(1) | 17(1)          |
| C(10) | 5399(1)  | 2619(1) | 6617(1) | 18(1)          |
| C(11) | 6689(1)  | 2899(1) | 6714(1) | 17(1)          |
| C(12) | 8162(1)  | 2968(1) | 5341(1) | 14(1)          |
| C(13) | 8046(1)  | 3879(1) | 4172(1) | 14(1)          |
| C(14) | 12455(1) | 3181(1) | 1232(1) | 25(1)          |
| C(15) | 7717(2)  | 248(1)  | 1460(1) | 24(1)          |
| C(16) | 6665(2)  | 3264(2) | 8182(1) | 28(1)          |

Table 3. Bond lengths [Å] and angles [°] for cdv49.

---

|              |            |
|--------------|------------|
| O(1)-C(1)    | 1.2199(13) |
| O(2)-C(9)    | 1.2308(13) |
| O(3)-C(4)    | 1.4458(12) |
| O(3)-O(4)    | 1.4663(11) |
| O(4)-H(4)    | 0.921(18)  |
| C(1)-C(12)   | 1.4881(14) |
| C(1)-C(2)    | 1.5107(14) |
| C(2)-C(3)    | 1.5327(14) |
| C(2)-H(2A)   | 0.987(14)  |
| C(2)-H(2B)   | 0.962(15)  |
| C(3)-C(14)   | 1.5273(15) |
| C(3)-C(4)    | 1.5384(14) |
| C(3)-H(3A)   | 0.993(13)  |
| C(4)-C(13)   | 1.4971(14) |
| C(4)-C(5)    | 1.5433(14) |
| C(5)-C(6)    | 1.5465(15) |
| C(5)-H(5A)   | 0.981(14)  |
| C(5)-H(5B)   | 0.962(15)  |
| C(6)-C(7)    | 1.5420(15) |
| C(6)-H(6A)   | 1.002(14)  |
| C(6)-H(6B)   | 0.985(16)  |
| C(7)-C(15)   | 1.5333(15) |
| C(7)-C(8)    | 1.5374(15) |
| C(7)-H(7A)   | 0.973(14)  |
| C(8)-C(9)    | 1.5126(14) |
| C(8)-H(8A)   | 0.974(15)  |
| C(8)-H(8B)   | 0.970(13)  |
| C(9)-C(10)   | 1.4810(15) |
| C(10)-C(11)  | 1.3415(15) |
| C(10)-H(10A) | 0.965(15)  |
| C(11)-C(12)  | 1.4831(14) |
| C(11)-C(16)  | 1.5000(15) |
| C(12)-C(13)  | 1.3388(14) |
| C(13)-H(13A) | 0.984(14)  |

|                  |           |
|------------------|-----------|
| C(14)-H(14A)     | 0.979(16) |
| C(14)-H(14B)     | 0.984(16) |
| C(14)-H(14C)     | 0.984(16) |
| C(15)-H(15A)     | 0.978(16) |
| C(15)-H(15B)     | 0.999(16) |
| C(15)-H(15C)     | 0.981(17) |
| C(16)-H(16A)     | 0.94(2)   |
| C(16)-H(16B)     | 0.99(2)   |
| C(16)-H(16C)     | 0.95(2)   |
|                  |           |
| C(4)-O(3)-O(4)   | 108.66(7) |
| O(3)-O(4)-H(4)   | 99.6(11)  |
| O(1)-C(1)-C(12)  | 120.82(9) |
| O(1)-C(1)-C(2)   | 121.67(9) |
| C(12)-C(1)-C(2)  | 117.42(9) |
| C(1)-C(2)-C(3)   | 116.00(8) |
| C(1)-C(2)-H(2A)  | 104.9(8)  |
| C(3)-C(2)-H(2A)  | 111.3(8)  |
| C(1)-C(2)-H(2B)  | 108.0(9)  |
| C(3)-C(2)-H(2B)  | 110.7(9)  |
| H(2A)-C(2)-H(2B) | 105.1(12) |
| C(14)-C(3)-C(2)  | 110.48(9) |
| C(14)-C(3)-C(4)  | 112.96(9) |
| C(2)-C(3)-C(4)   | 110.96(8) |
| C(14)-C(3)-H(3A) | 109.5(7)  |
| C(2)-C(3)-H(3A)  | 108.2(7)  |
| C(4)-C(3)-H(3A)  | 104.5(7)  |
| O(3)-C(4)-C(13)  | 109.49(8) |
| O(3)-C(4)-C(3)   | 110.90(8) |
| C(13)-C(4)-C(3)  | 110.56(8) |
| O(3)-C(4)-C(5)   | 102.77(8) |
| C(13)-C(4)-C(5)  | 109.17(8) |
| C(3)-C(4)-C(5)   | 113.65(8) |
| C(4)-C(5)-C(6)   | 115.60(9) |
| C(4)-C(5)-H(5A)  | 106.9(8)  |
| C(6)-C(5)-H(5A)  | 110.3(8)  |

|                    |            |
|--------------------|------------|
| C(4)-C(5)-H(5B)    | 106.5(9)   |
| C(6)-C(5)-H(5B)    | 110.1(9)   |
| H(5A)-C(5)-H(5B)   | 106.9(12)  |
| C(7)-C(6)-C(5)     | 115.57(9)  |
| C(7)-C(6)-H(6A)    | 109.2(8)   |
| C(5)-C(6)-H(6A)    | 111.2(8)   |
| C(7)-C(6)-H(6B)    | 106.2(9)   |
| C(5)-C(6)-H(6B)    | 108.9(9)   |
| H(6A)-C(6)-H(6B)   | 105.2(11)  |
| C(15)-C(7)-C(8)    | 109.64(9)  |
| C(15)-C(7)-C(6)    | 111.54(9)  |
| C(8)-C(7)-C(6)     | 113.80(8)  |
| C(15)-C(7)-H(7A)   | 107.2(8)   |
| C(8)-C(7)-H(7A)    | 107.7(8)   |
| C(6)-C(7)-H(7A)    | 106.7(8)   |
| C(9)-C(8)-C(7)     | 115.40(9)  |
| C(9)-C(8)-H(8A)    | 102.3(8)   |
| C(7)-C(8)-H(8A)    | 108.0(8)   |
| C(9)-C(8)-H(8B)    | 112.3(8)   |
| C(7)-C(8)-H(8B)    | 111.9(8)   |
| H(8A)-C(8)-H(8B)   | 105.9(11)  |
| O(2)-C(9)-C(10)    | 118.15(9)  |
| O(2)-C(9)-C(8)     | 118.64(9)  |
| C(10)-C(9)-C(8)    | 122.72(9)  |
| C(11)-C(10)-C(9)   | 128.17(10) |
| C(11)-C(10)-H(10A) | 118.4(9)   |
| C(9)-C(10)-H(10A)  | 113.4(9)   |
| C(10)-C(11)-C(12)  | 120.85(9)  |
| C(10)-C(11)-C(16)  | 121.87(10) |
| C(12)-C(11)-C(16)  | 117.13(9)  |
| C(13)-C(12)-C(11)  | 119.99(9)  |
| C(13)-C(12)-C(1)   | 120.57(9)  |
| C(11)-C(12)-C(1)   | 119.33(9)  |
| C(12)-C(13)-C(4)   | 124.41(9)  |
| C(12)-C(13)-H(13A) | 119.7(8)   |
| C(4)-C(13)-H(13A)  | 115.7(8)   |

|                     |           |
|---------------------|-----------|
| C(3)-C(14)-H(14A)   | 111.4(9)  |
| C(3)-C(14)-H(14B)   | 110.6(9)  |
| H(14A)-C(14)-H(14B) | 107.9(13) |
| C(3)-C(14)-H(14C)   | 110.7(9)  |
| H(14A)-C(14)-H(14C) | 108.3(13) |
| H(14B)-C(14)-H(14C) | 107.8(13) |
| C(7)-C(15)-H(15A)   | 110.9(10) |
| C(7)-C(15)-H(15B)   | 111.3(9)  |
| H(15A)-C(15)-H(15B) | 109.9(13) |
| C(7)-C(15)-H(15C)   | 110.6(10) |
| H(15A)-C(15)-H(15C) | 106.9(13) |
| H(15B)-C(15)-H(15C) | 107.1(13) |
| C(11)-C(16)-H(16A)  | 112.7(12) |
| C(11)-C(16)-H(16B)  | 107.6(12) |
| H(16A)-C(16)-H(16B) | 103.8(17) |
| C(11)-C(16)-H(16C)  | 111.8(12) |
| H(16A)-C(16)-H(16C) | 111.4(17) |
| H(16B)-C(16)-H(16C) | 109.2(17) |

---



Table 4. Anisotropic displacement parameters ( $\text{\AA}^2 \times 10^3$ ) for cdv49. The anisotropic displacement factor exponent takes the form:  $-2\pi^2 [ h^2 a^2 U^{11} + \dots + 2 h k a^* b^* U^{12} ]$

|       | U <sup>11</sup> | U <sup>22</sup> | U <sup>33</sup> | U <sup>23</sup> | U <sup>13</sup> | U <sup>12</sup> |
|-------|-----------------|-----------------|-----------------|-----------------|-----------------|-----------------|
| O(1)  | 26(1)           | 20(1)           | 21(1)           | 4(1)            | -13(1)          | -5(1)           |
| O(2)  | 15(1)           | 25(1)           | 34(1)           | -9(1)           | -10(1)          | -1(1)           |
| O(3)  | 28(1)           | 14(1)           | 17(1)           | 2(1)            | -8(1)           | -7(1)           |
| O(4)  | 22(1)           | 16(1)           | 30(1)           | -5(1)           | -7(1)           | -6(1)           |
| C(1)  | 17(1)           | 15(1)           | 17(1)           | 0(1)            | -9(1)           | -6(1)           |
| C(2)  | 13(1)           | 18(1)           | 21(1)           | 0(1)            | -6(1)           | -3(1)           |
| C(3)  | 14(1)           | 17(1)           | 17(1)           | 0(1)            | -3(1)           | -6(1)           |
| C(4)  | 17(1)           | 12(1)           | 14(1)           | 1(1)            | -5(1)           | -5(1)           |
| C(5)  | 22(1)           | 18(1)           | 14(1)           | -1(1)           | -6(1)           | -7(1)           |
| C(6)  | 26(1)           | 19(1)           | 20(1)           | 0(1)            | -14(1)          | -5(1)           |
| C(7)  | 18(1)           | 19(1)           | 21(1)           | -3(1)           | -11(1)          | -4(1)           |
| C(8)  | 13(1)           | 14(1)           | 20(1)           | -2(1)           | -6(1)           | -4(1)           |
| C(9)  | 14(1)           | 14(1)           | 22(1)           | 0(1)            | -6(1)           | -6(1)           |
| C(10) | 15(1)           | 20(1)           | 17(1)           | -2(1)           | -1(1)           | -6(1)           |
| C(11) | 18(1)           | 18(1)           | 14(1)           | 0(1)            | -4(1)           | -6(1)           |
| C(12) | 14(1)           | 16(1)           | 13(1)           | -2(1)           | -5(1)           | -6(1)           |
| C(13) | 14(1)           | 14(1)           | 16(1)           | -2(1)           | -5(1)           | -4(1)           |
| C(14) | 18(1)           | 27(1)           | 23(1)           | 0(1)            | 0(1)            | -7(1)           |
| C(15) | 30(1)           | 22(1)           | 23(1)           | -6(1)           | -10(1)          | -8(1)           |
| C(16) | 26(1)           | 44(1)           | 14(1)           | -4(1)           | -4(1)           | -15(1)          |

Table 5. Hydrogen coordinates ( $\times 10^4$ ) and isotropic displacement parameters ( $\text{\AA}^2 \times 10^3$ ) for cdv49.

|        | x         | y        | z        | U(eq) |
|--------|-----------|----------|----------|-------|
| H(4)   | 8170(20)  | 6730(19) | 3330(20) | 42(5) |
| H(2A)  | 11358(17) | 1084(16) | 3255(15) | 21(3) |
| H(2B)  | 12128(18) | 1819(16) | 4021(16) | 26(4) |
| H(3A)  | 11049(15) | 4235(15) | 3277(15) | 16(3) |
| H(5A)  | 9667(16)  | 1783(16) | 1897(15) | 20(3) |
| H(5B)  | 9880(18)  | 3015(16) | 611(17)  | 25(3) |
| H(6A)  | 6695(17)  | 3884(16) | 2333(16) | 21(3) |
| H(6B)  | 7435(18)  | 3157(16) | 739(18)  | 29(4) |
| H(7A)  | 5660(17)  | 1870(16) | 2445(16) | 23(3) |
| H(8A)  | 6308(17)  | 254(16)  | 4362(16) | 24(3) |
| H(8B)  | 7638(16)  | 1044(14) | 4175(15) | 16(3) |
| H(10A) | 4417(18)  | 2707(16) | 7513(17) | 25(3) |
| H(13A) | 7004(17)  | 4582(15) | 4271(15) | 19(3) |
| H(14A) | 12335(19) | 4042(18) | 548(18)  | 35(4) |
| H(14B) | 13490(20) | 3053(17) | 1348(18) | 33(4) |
| H(14C) | 12530(18) | 2288(18) | 753(17)  | 30(4) |
| H(15A) | 7837(19)  | 491(18)  | 408(19)  | 35(4) |
| H(15B) | 8806(19)  | -155(17) | 1513(17) | 31(4) |
| H(15C) | 7150(20)  | -557(19) | 1809(18) | 37(4) |
| H(16A) | 7650(30)  | 2820(20) | 8300(20) | 58(6) |
| H(16B) | 6590(30)  | 4340(30) | 8150(20) | 64(6) |
| H(16C) | 5770(20)  | 3040(20) | 9020(20) | 55(5) |

Table 6. Torsion angles [°] for cdv49.

---

|                         |             |
|-------------------------|-------------|
| O(1)-C(1)-C(2)-C(3)     | -163.35(10) |
| C(12)-C(1)-C(2)-C(3)    | 20.02(13)   |
| C(1)-C(2)-C(3)-C(14)    | -171.10(9)  |
| C(1)-C(2)-C(3)-C(4)     | -45.01(12)  |
| O(4)-O(3)-C(4)-C(13)    | 63.08(10)   |
| O(4)-O(3)-C(4)-C(3)     | -59.19(10)  |
| O(4)-O(3)-C(4)-C(5)     | 179.01(7)   |
| C(14)-C(3)-C(4)-O(3)    | -63.98(11)  |
| C(2)-C(3)-C(4)-O(3)     | 171.32(8)   |
| C(14)-C(3)-C(4)-C(13)   | 174.37(9)   |
| C(2)-C(3)-C(4)-C(13)    | 49.68(11)   |
| C(14)-C(3)-C(4)-C(5)    | 51.20(12)   |
| C(2)-C(3)-C(4)-C(5)     | -73.50(11)  |
| O(3)-C(4)-C(5)-C(6)     | -73.66(10)  |
| C(13)-C(4)-C(5)-C(6)    | 42.50(12)   |
| C(3)-C(4)-C(5)-C(6)     | 166.43(9)   |
| C(4)-C(5)-C(6)-C(7)     | -114.00(10) |
| C(5)-C(6)-C(7)-C(15)    | -62.92(12)  |
| C(5)-C(6)-C(7)-C(8)     | 61.77(12)   |
| C(15)-C(7)-C(8)-C(9)    | -159.68(9)  |
| C(6)-C(7)-C(8)-C(9)     | 74.62(11)   |
| C(7)-C(8)-C(9)-O(2)     | 44.51(13)   |
| C(7)-C(8)-C(9)-C(10)    | -143.63(10) |
| O(2)-C(9)-C(10)-C(11)   | -149.71(11) |
| C(8)-C(9)-C(10)-C(11)   | 38.39(17)   |
| C(9)-C(10)-C(11)-C(12)  | 5.58(17)    |
| C(9)-C(10)-C(11)-C(16)  | -178.98(11) |
| C(10)-C(11)-C(12)-C(13) | 54.08(14)   |
| C(16)-C(11)-C(12)-C(13) | -121.56(12) |
| C(10)-C(11)-C(12)-C(1)  | -122.05(11) |
| C(16)-C(11)-C(12)-C(1)  | 62.31(13)   |
| O(1)-C(1)-C(12)-C(13)   | -176.85(9)  |
| C(2)-C(1)-C(12)-C(13)   | -0.18(14)   |
| O(1)-C(1)-C(12)-C(11)   | -0.74(15)   |

|                        |            |
|------------------------|------------|
| C(2)-C(1)-C(12)-C(11)  | 175.93(9)  |
| C(11)-C(12)-C(13)-C(4) | -168.20(9) |
| C(1)-C(12)-C(13)-C(4)  | 7.88(15)   |
| O(3)-C(4)-C(13)-C(12)  | -155.96(9) |
| C(3)-C(4)-C(13)-C(12)  | -33.48(13) |
| C(5)-C(4)-C(13)-C(12)  | 92.25(12)  |

---

Table 7. Hydrogen bonds for cdv49 [ $\text{\AA}$  and  $^\circ$ ].

| D-H...A            | d(D-H)    | d(H...A)  | d(D...A)   | $\angle(\text{DHA})$ |
|--------------------|-----------|-----------|------------|----------------------|
| O(4)-H(4)...O(2)#1 | 0.921(18) | 1.871(19) | 2.7817(12) | 169.8(16)            |

Symmetry transformations used to generate equivalent atoms:

#1  $-x+1, -y+1, -z+1$

### X-ray Data Collection, Structure Solution and Refinement for tricyclic enone 24 (cdv48).

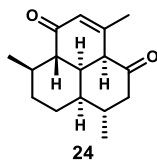

A colorless crystal of approximate dimensions 0.106 x 0.146 x 0.332 mm was mounted on a glass fiber and transferred to a Bruker SMART APEX II diffractometer. The APEX2<sup>4</sup> program package was used to determine the unit-cell parameters and for data collection (90 sec/frame scan time for a sphere of diffraction data). The raw frame data was processed using SAINT<sup>5</sup> and SADABS<sup>6</sup> to yield the reflection data file. Subsequent calculations were carried out using the SHELXTL<sup>7</sup> program. The diffraction symmetry was *mmm* and the systematic absences were consistent with the orthorhombic space group *Pbcn* that was later determined to be correct.

The structure was solved by direct methods and refined on  $F^2$  by full-matrix least-squares techniques. The analytical scattering factors<sup>8</sup> for neutral atoms were used throughout the analysis. Hydrogen atoms were located from a difference-Fourier map and refined ( $x, y, z$  and  $U_{iso}$ ).

Least-squares analysis yielded  $wR2 = 0.1080$  and  $Goof = 1.023$  for 251 variables refined against 3421 data (0.75 Å),  $R1 = 0.0420$  for those 2835 data with  $I > 2.0\sigma(I)$ .

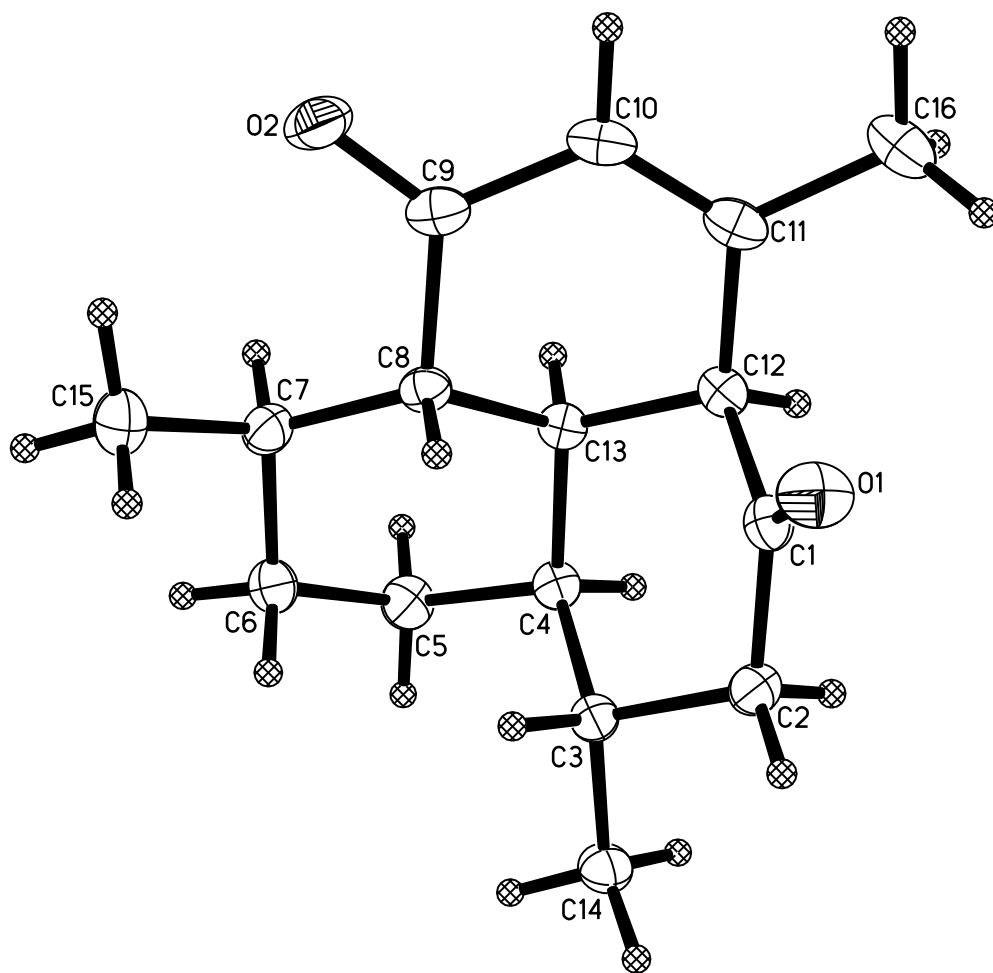

Table 1. Crystal data and structure refinement for cdv48.

|                                         |                                                |          |
|-----------------------------------------|------------------------------------------------|----------|
| Identification code                     | cdv48 (Vincenzo Ramella)                       |          |
| Empirical formula                       | C <sub>16</sub> H <sub>22</sub> O <sub>2</sub> |          |
| Formula weight                          | 246.33                                         |          |
| Temperature                             | 133(2) K                                       |          |
| Wavelength                              | 0.71073 Å                                      |          |
| Crystal system                          | Orthorhombic                                   |          |
| Space group                             | <i>Pbcn</i>                                    |          |
| Unit cell dimensions                    | a = 23.1932(11) Å                              | α = 90°. |
|                                         | b = 11.6587(6) Å                               | β = 90°. |
|                                         | c = 10.2797(5) Å                               | γ = 90°. |
| Volume                                  | 2779.7(2) Å <sup>3</sup>                       |          |
| Z                                       | 8                                              |          |
| Density (calculated)                    | 1.177 Mg/m <sup>3</sup>                        |          |
| Absorption coefficient                  | 0.076 mm <sup>-1</sup>                         |          |
| F(000)                                  | 1072                                           |          |
| Crystal color                           | colorless                                      |          |
| Crystal size                            | 0.332 x 0.146 x 0.106 mm <sup>3</sup>          |          |
| Theta range for data collection         | 1.756 to 28.286°                               |          |
| Index ranges                            | -30 ≤ h ≤ 30, -14 ≤ k ≤ 15, -13 ≤ l ≤ 13       |          |
| Reflections collected                   | 31333                                          |          |
| Independent reflections                 | 3421 [R(int) = 0.0330]                         |          |
| Completeness to theta = 25.500°         | 100.0 %                                        |          |
| Absorption correction                   | Semi-empirical from equivalents                |          |
| Max. and min. transmission              | 0.8621 and 0.8097                              |          |
| Refinement method                       | Full-matrix least-squares on F <sup>2</sup>    |          |
| Data / restraints / parameters          | 3421 / 0 / 251                                 |          |
| Goodness-of-fit on F <sup>2</sup>       | 1.023                                          |          |
| Final R indices [I > 2σ(I) = 2835 data] | R1 = 0.0420, wR2 = 0.1010                      |          |
| R indices (all data, 0.75 Å)            | R1 = 0.0542, wR2 = 0.1080                      |          |
| Largest diff. peak and hole             | 0.372 and -0.163 e.Å <sup>-3</sup>             |          |



Table 2. Atomic coordinates ( $\times 10^4$ ) and equivalent isotropic displacement parameters ( $\text{\AA}^2 \times 10^3$ ) for cdv48.  $U(\text{eq})$  is defined as one third of the trace of the orthogonalized  $U^{ij}$  tensor.

|       | x       | y        | z       | $U(\text{eq})$ |
|-------|---------|----------|---------|----------------|
| O(1)  | 2865(1) | 10319(1) | 1678(1) | 29(1)          |
| O(2)  | 4775(1) | 8282(1)  | 611(1)  | 30(1)          |
| C(1)  | 3007(1) | 9802(1)  | 2651(1) | 19(1)          |
| C(2)  | 2589(1) | 9115(1)  | 3449(1) | 20(1)          |
| C(3)  | 2790(1) | 7875(1)  | 3688(1) | 17(1)          |
| C(4)  | 3414(1) | 7859(1)  | 4198(1) | 18(1)          |
| C(5)  | 3657(1) | 6647(1)  | 4363(1) | 23(1)          |
| C(6)  | 3732(1) | 6052(1)  | 3055(1) | 24(1)          |
| C(7)  | 4129(1) | 6710(1)  | 2124(1) | 22(1)          |
| C(8)  | 3950(1) | 7977(1)  | 2004(1) | 17(1)          |
| C(9)  | 4400(1) | 8705(1)  | 1293(1) | 21(1)          |
| C(10) | 4375(1) | 9956(1)  | 1460(1) | 23(1)          |
| C(11) | 4029(1) | 10480(1) | 2311(1) | 21(1)          |
| C(12) | 3626(1) | 9793(1)  | 3158(1) | 18(1)          |
| C(13) | 3831(1) | 8544(1)  | 3338(1) | 17(1)          |
| C(14) | 2374(1) | 7308(1)  | 4648(1) | 23(1)          |
| C(15) | 4142(1) | 6084(1)  | 814(1)  | 32(1)          |
| C(16) | 4035(1) | 11755(1) | 2494(1) | 28(1)          |

Table 3. Bond lengths [Å] and angles [°] for cdv48.

---

|                 |            |
|-----------------|------------|
| O(1)-C(1)       | 1.2132(14) |
| O(2)-C(9)       | 1.2225(15) |
| C(1)-C(2)       | 1.5016(16) |
| C(1)-C(12)      | 1.5278(16) |
| C(2)-C(3)       | 1.5394(16) |
| C(3)-C(14)      | 1.5311(16) |
| C(3)-C(4)       | 1.5379(16) |
| C(4)-C(5)       | 1.5304(16) |
| C(4)-C(13)      | 1.5355(15) |
| C(5)-C(6)       | 1.5240(17) |
| C(6)-C(7)       | 1.5338(17) |
| C(7)-C(15)      | 1.5324(17) |
| C(7)-C(8)       | 1.5397(16) |
| C(8)-C(9)       | 1.5310(16) |
| C(8)-C(13)      | 1.5466(15) |
| C(9)-C(10)      | 1.4689(18) |
| C(10)-C(11)     | 1.3341(18) |
| C(11)-C(16)     | 1.4993(17) |
| C(11)-C(12)     | 1.5069(16) |
| C(12)-C(13)     | 1.5423(15) |
|                 |            |
| O(1)-C(1)-C(2)  | 122.67(11) |
| O(1)-C(1)-C(12) | 122.65(11) |
| C(2)-C(1)-C(12) | 114.68(9)  |
| C(1)-C(2)-C(3)  | 113.09(9)  |
| C(14)-C(3)-C(4) | 111.63(9)  |
| C(14)-C(3)-C(2) | 108.49(9)  |
| C(4)-C(3)-C(2)  | 110.58(9)  |
| C(5)-C(4)-C(13) | 108.17(9)  |
| C(5)-C(4)-C(3)  | 113.29(10) |
| C(13)-C(4)-C(3) | 112.97(9)  |
| C(6)-C(5)-C(4)  | 111.41(10) |
| C(5)-C(6)-C(7)  | 113.01(10) |
| C(15)-C(7)-C(6) | 108.70(10) |

|                   |            |
|-------------------|------------|
| C(15)-C(7)-C(8)   | 113.05(10) |
| C(6)-C(7)-C(8)    | 111.58(9)  |
| C(9)-C(8)-C(7)    | 112.70(9)  |
| C(9)-C(8)-C(13)   | 107.90(9)  |
| C(7)-C(8)-C(13)   | 112.77(9)  |
| O(2)-C(9)-C(10)   | 119.76(11) |
| O(2)-C(9)-C(8)    | 122.37(11) |
| C(10)-C(9)-C(8)   | 117.86(10) |
| C(11)-C(10)-C(9)  | 123.70(11) |
| C(10)-C(11)-C(16) | 122.09(11) |
| C(10)-C(11)-C(12) | 120.49(11) |
| C(16)-C(11)-C(12) | 117.40(11) |
| C(11)-C(12)-C(1)  | 112.45(9)  |
| C(11)-C(12)-C(13) | 112.34(10) |
| C(1)-C(12)-C(13)  | 109.72(9)  |
| C(4)-C(13)-C(12)  | 111.47(9)  |
| C(4)-C(13)-C(8)   | 113.58(9)  |
| C(12)-C(13)-C(8)  | 110.58(9)  |

---

Table 4. Anisotropic displacement parameters ( $\text{\AA}^2 \times 10^3$ ) for cdv48. The anisotropic displacement factor exponent takes the form:  $-2\pi^2 [ h^2 a^{*2} U^{11} + \dots + 2 h k a^* b^* U^{12} ]$

|       | U <sup>11</sup> | U <sup>22</sup> | U <sup>33</sup> | U <sup>23</sup> | U <sup>13</sup> | U <sup>12</sup> |
|-------|-----------------|-----------------|-----------------|-----------------|-----------------|-----------------|
| O(1)  | 28(1)           | 32(1)           | 25(1)           | 12(1)           | -5(1)           | 0(1)            |
| O(2)  | 23(1)           | 38(1)           | 28(1)           | -4(1)           | 8(1)            | -5(1)           |
| C(1)  | 22(1)           | 17(1)           | 18(1)           | 0(1)            | 0(1)            | 1(1)            |
| C(2)  | 19(1)           | 21(1)           | 21(1)           | 2(1)            | 1(1)            | 2(1)            |
| C(3)  | 19(1)           | 18(1)           | 14(1)           | 1(1)            | 2(1)            | 0(1)            |
| C(4)  | 21(1)           | 18(1)           | 13(1)           | 2(1)            | 0(1)            | 0(1)            |
| C(5)  | 26(1)           | 21(1)           | 22(1)           | 6(1)            | 0(1)            | 3(1)            |
| C(6)  | 24(1)           | 18(1)           | 30(1)           | 1(1)            | 2(1)            | 2(1)            |
| C(7)  | 18(1)           | 24(1)           | 24(1)           | -3(1)           | 1(1)            | 1(1)            |
| C(8)  | 15(1)           | 21(1)           | 16(1)           | -1(1)           | -1(1)           | -2(1)           |
| C(9)  | 17(1)           | 30(1)           | 15(1)           | 0(1)            | -2(1)           | -5(1)           |
| C(10) | 21(1)           | 28(1)           | 19(1)           | 4(1)            | -2(1)           | -9(1)           |
| C(11) | 22(1)           | 23(1)           | 18(1)           | 3(1)            | -6(1)           | -7(1)           |
| C(12) | 22(1)           | 18(1)           | 13(1)           | 0(1)            | -1(1)           | -2(1)           |
| C(13) | 17(1)           | 19(1)           | 14(1)           | 1(1)            | -2(1)           | -1(1)           |
| C(14) | 25(1)           | 22(1)           | 23(1)           | 1(1)            | 5(1)            | -4(1)           |
| C(15) | 37(1)           | 28(1)           | 31(1)           | -9(1)           | 7(1)            | -1(1)           |
| C(16) | 40(1)           | 22(1)           | 22(1)           | 3(1)            | -4(1)           | -10(1)          |

Table 5. Hydrogen coordinates ( $\times 10^4$ ) and isotropic displacement parameters ( $\text{\AA}^2 \times 10^{-3}$ ) for cdv48.

|        | x       | y         | z        | U(eq) |
|--------|---------|-----------|----------|-------|
| H(2A)  | 2210(6) | 9139(12)  | 3031(14) | 22(3) |
| H(2B)  | 2562(6) | 9483(12)  | 4274(14) | 22(3) |
| H(3A)  | 2777(5) | 7475(11)  | 2863(13) | 14(3) |
| H(4A)  | 3410(6) | 8236(11)  | 5053(13) | 17(3) |
| H(5A)  | 4040(7) | 6701(12)  | 4805(15) | 27(4) |
| H(5B)  | 3414(6) | 6189(13)  | 4942(15) | 27(4) |
| H(6A)  | 3347(6) | 5930(12)  | 2616(14) | 24(4) |
| H(6B)  | 3896(7) | 5287(14)  | 3195(15) | 30(4) |
| H(7A)  | 4522(6) | 6710(12)  | 2526(15) | 26(4) |
| H(8A)  | 3595(6) | 8018(11)  | 1461(13) | 19(3) |
| H(10A) | 4638(6) | 10388(13) | 939(15)  | 27(4) |
| H(12A) | 3610(6) | 10135(11) | 4030(14) | 18(3) |
| H(13A) | 4205(6) | 8583(11)  | 3812(13) | 16(3) |
| H(14A) | 2464(7) | 6498(14)  | 4784(15) | 34(4) |
| H(14B) | 1965(6) | 7368(13)  | 4294(14) | 25(4) |
| H(14C) | 2412(6) | 7690(13)  | 5502(15) | 29(4) |
| H(15A) | 4261(8) | 5276(16)  | 942(17)  | 45(5) |
| H(15B) | 4410(7) | 6435(15)  | 187(17)  | 39(4) |
| H(15C) | 3749(8) | 6087(16)  | 380(18)  | 48(5) |
| H(16A) | 4299(7) | 12124(15) | 1869(17) | 39(4) |
| H(16B) | 4163(7) | 11921(13) | 3364(17) | 36(4) |
| H(16C) | 3639(8) | 12083(14) | 2374(17) | 40(4) |

Table 6. Torsion angles [°] for cdv48.

---

|                         |             |
|-------------------------|-------------|
| O(1)-C(1)-C(2)-C(3)     | 127.26(12)  |
| C(12)-C(1)-C(2)-C(3)    | -52.35(13)  |
| C(1)-C(2)-C(3)-C(14)    | 172.82(10)  |
| C(1)-C(2)-C(3)-C(4)     | 50.08(13)   |
| C(14)-C(3)-C(4)-C(5)    | 63.31(13)   |
| C(2)-C(3)-C(4)-C(5)     | -175.81(9)  |
| C(14)-C(3)-C(4)-C(13)   | -173.24(9)  |
| C(2)-C(3)-C(4)-C(13)    | -52.36(12)  |
| C(13)-C(4)-C(5)-C(6)    | -58.87(13)  |
| C(3)-C(4)-C(5)-C(6)     | 67.17(13)   |
| C(4)-C(5)-C(6)-C(7)     | 58.10(14)   |
| C(5)-C(6)-C(7)-C(15)    | -176.11(11) |
| C(5)-C(6)-C(7)-C(8)     | -50.76(14)  |
| C(15)-C(7)-C(8)-C(9)    | -67.90(13)  |
| C(6)-C(7)-C(8)-C(9)     | 169.20(10)  |
| C(15)-C(7)-C(8)-C(13)   | 169.63(10)  |
| C(6)-C(7)-C(8)-C(13)    | 46.73(13)   |
| C(7)-C(8)-C(9)-O(2)     | 17.99(15)   |
| C(13)-C(8)-C(9)-O(2)    | 143.16(11)  |
| C(7)-C(8)-C(9)-C(10)    | -161.39(10) |
| C(13)-C(8)-C(9)-C(10)   | -36.22(13)  |
| O(2)-C(9)-C(10)-C(11)   | -171.14(11) |
| C(8)-C(9)-C(10)-C(11)   | 8.25(17)    |
| C(9)-C(10)-C(11)-C(16)  | 177.22(11)  |
| C(9)-C(10)-C(11)-C(12)  | -0.94(18)   |
| C(10)-C(11)-C(12)-C(1)  | -100.96(13) |
| C(16)-C(11)-C(12)-C(1)  | 80.79(13)   |
| C(10)-C(11)-C(12)-C(13) | 23.41(15)   |
| C(16)-C(11)-C(12)-C(13) | -154.83(10) |
| O(1)-C(1)-C(12)-C(11)   | -0.48(16)   |
| C(2)-C(1)-C(12)-C(11)   | 179.12(10)  |
| O(1)-C(1)-C(12)-C(13)   | -126.29(11) |
| C(2)-C(1)-C(12)-C(13)   | 53.32(12)   |
| C(5)-C(4)-C(13)-C(12)   | -178.24(9)  |

|                        |            |
|------------------------|------------|
| C(3)-C(4)-C(13)-C(12)  | 55.53(12)  |
| C(5)-C(4)-C(13)-C(8)   | 56.05(12)  |
| C(3)-C(4)-C(13)-C(8)   | -70.19(12) |
| C(11)-C(12)-C(13)-C(4) | -179.74(9) |
| C(1)-C(12)-C(13)-C(4)  | -53.87(12) |
| C(11)-C(12)-C(13)-C(8) | -52.38(12) |
| C(1)-C(12)-C(13)-C(8)  | 73.49(11)  |
| C(9)-C(8)-C(13)-C(4)   | -176.32(9) |
| C(7)-C(8)-C(13)-C(4)   | -51.20(13) |
| C(9)-C(8)-C(13)-C(12)  | 57.49(12)  |
| C(7)-C(8)-C(13)-C(12)  | -177.38(9) |

---

Table 7. Hydrogen bonds for cdv48 [ $\text{\AA}$  and  $^\circ$ ].

| D-H...A               | d(D-H)    | d(H...A)  | d(D...A)   | $\angle(\text{DHA})$ |
|-----------------------|-----------|-----------|------------|----------------------|
| C(2)-H(2B)...O(1)#1   | 0.953(15) | 2.579(15) | 3.4446(15) | 151.1(11)            |
| C(10)-H(10A)...O(2)#2 | 0.956(15) | 2.607(16) | 3.5559(15) | 171.8(12)            |

Symmetry transformations used to generate equivalent atoms:

#1  $x, -y+2, z+1/2$  #2  $-x+1, -y+2, -z$



### III. NMR Spectra

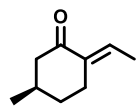

**13** (>95% pure)

600 MHz, CDCl<sub>3</sub>

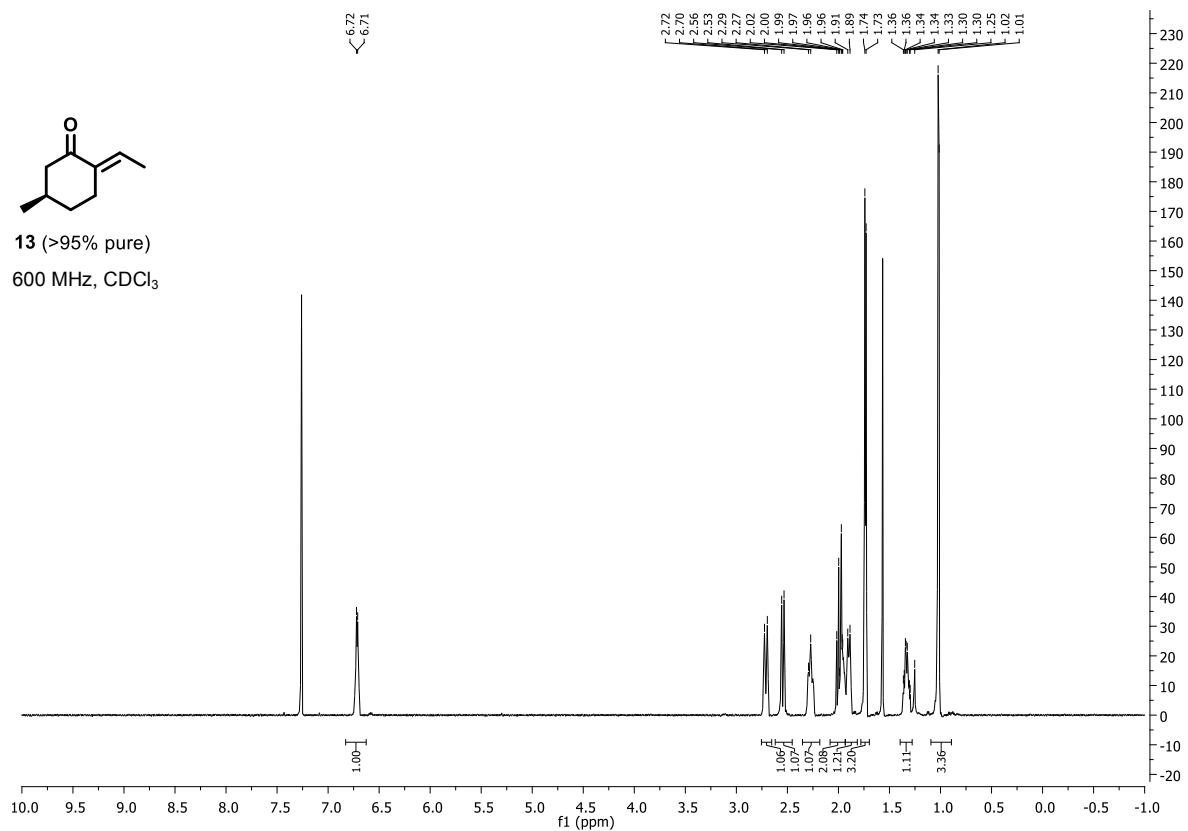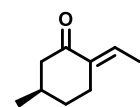

**13** (>95% pure)

151 MHz, CDCl<sub>3</sub>

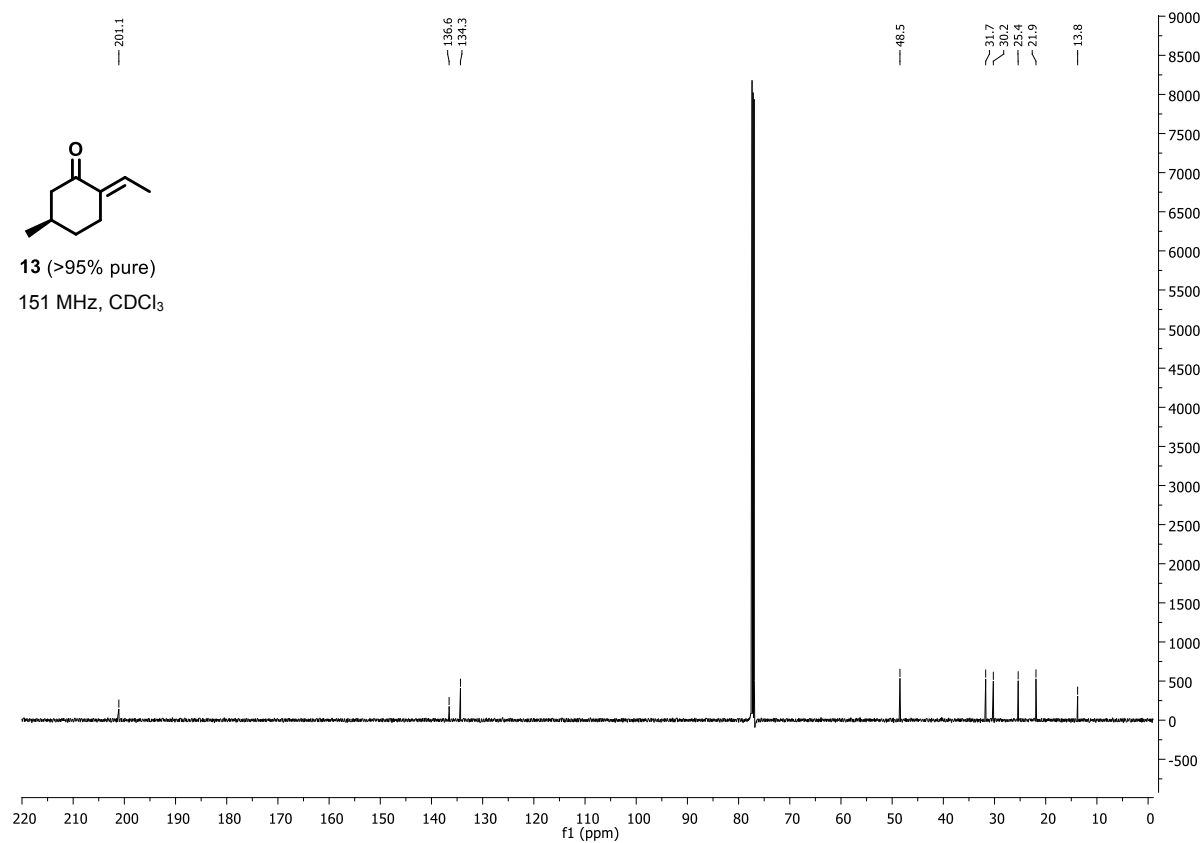

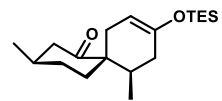

**15** (>95% pure)

500 MHz, CDCl<sub>3</sub>

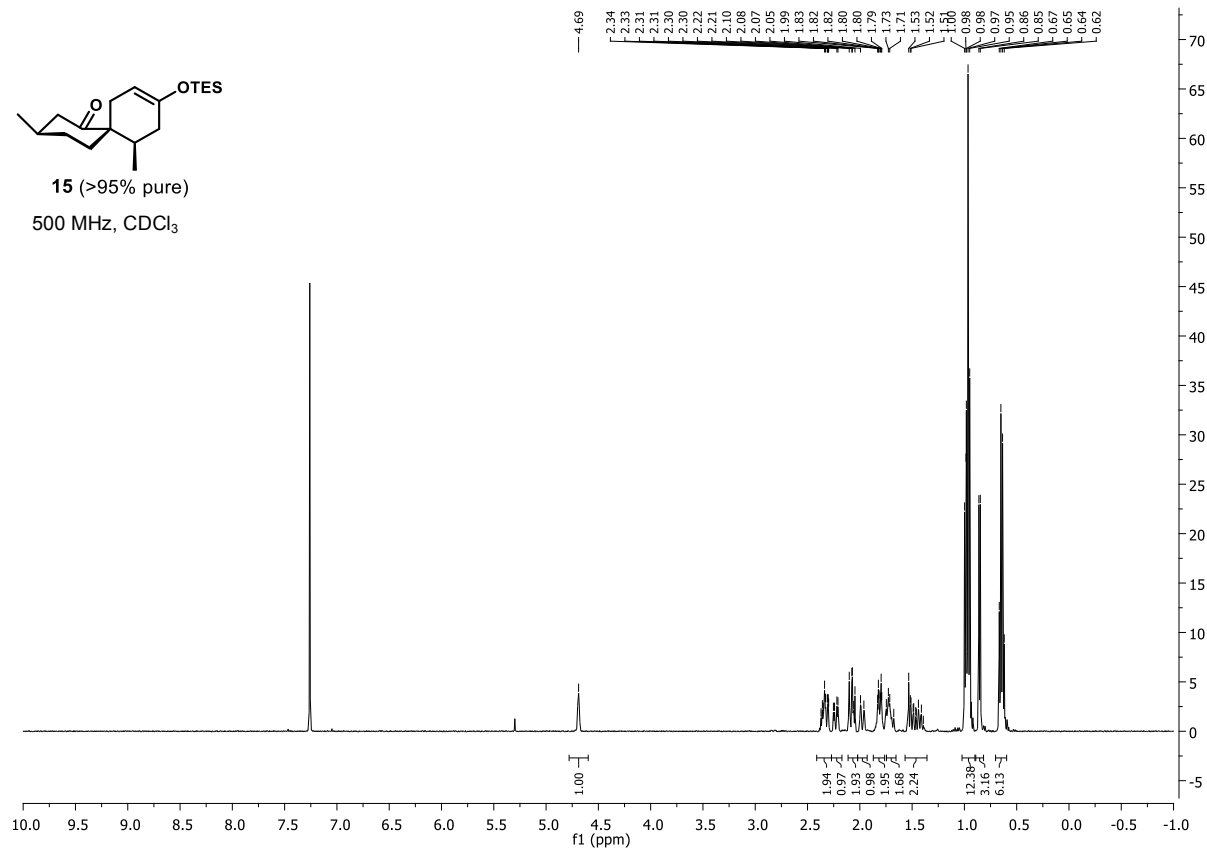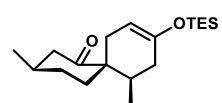

**15** (>95% pure)

126 MHz, CDCl<sub>3</sub>

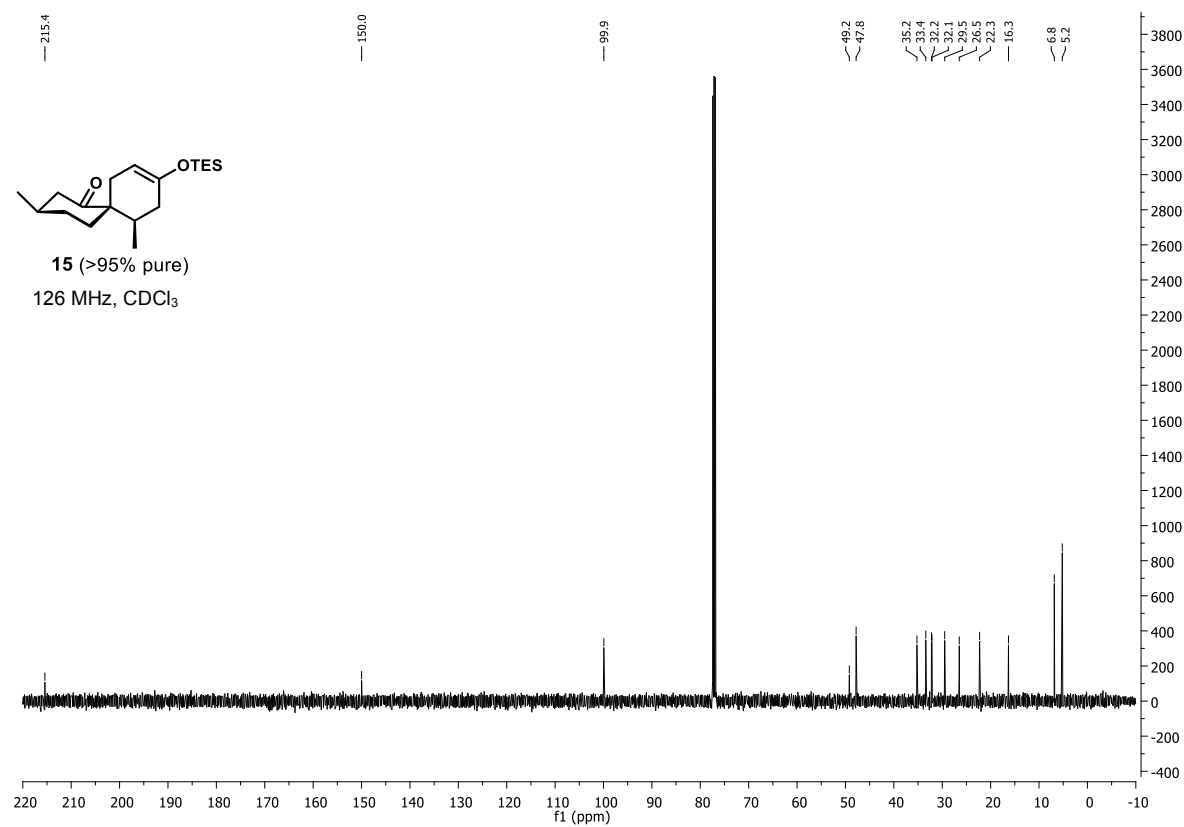

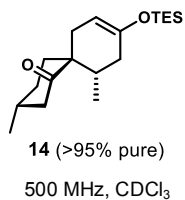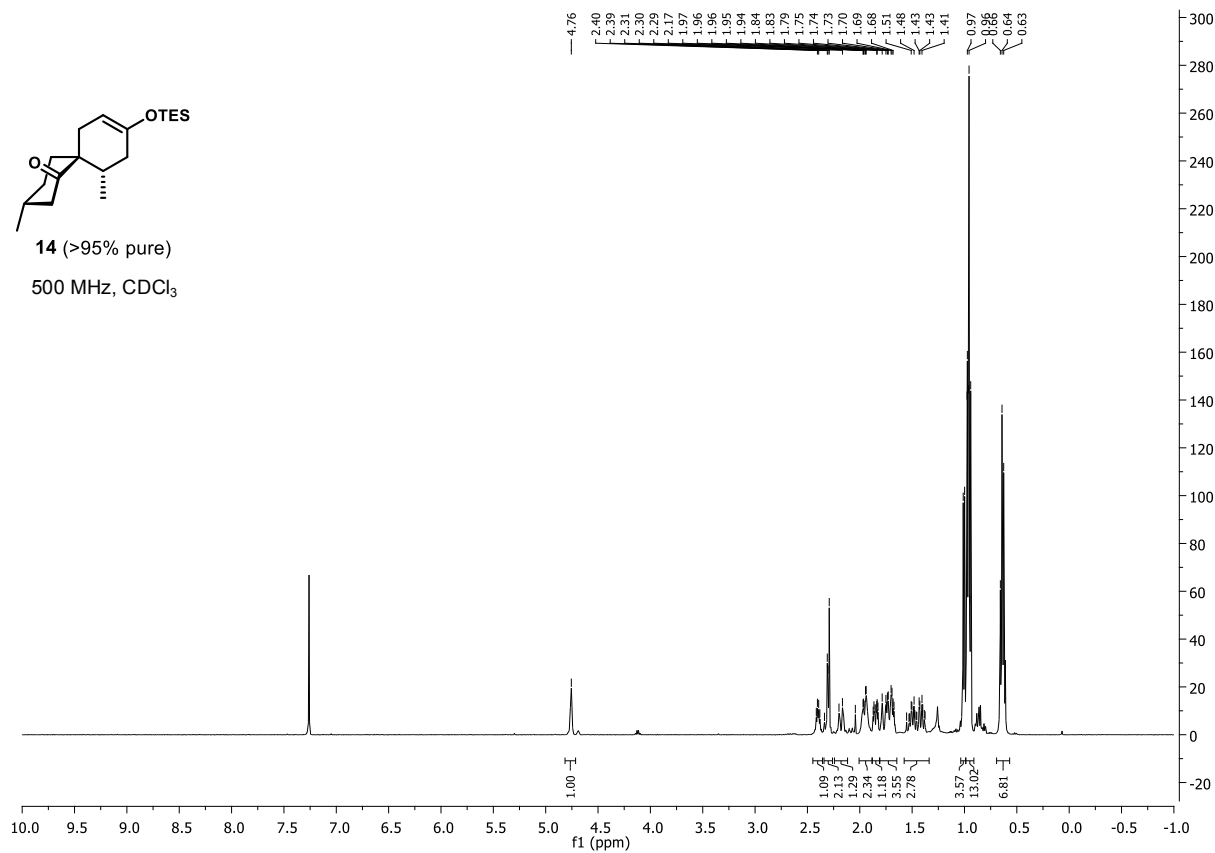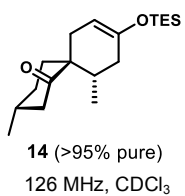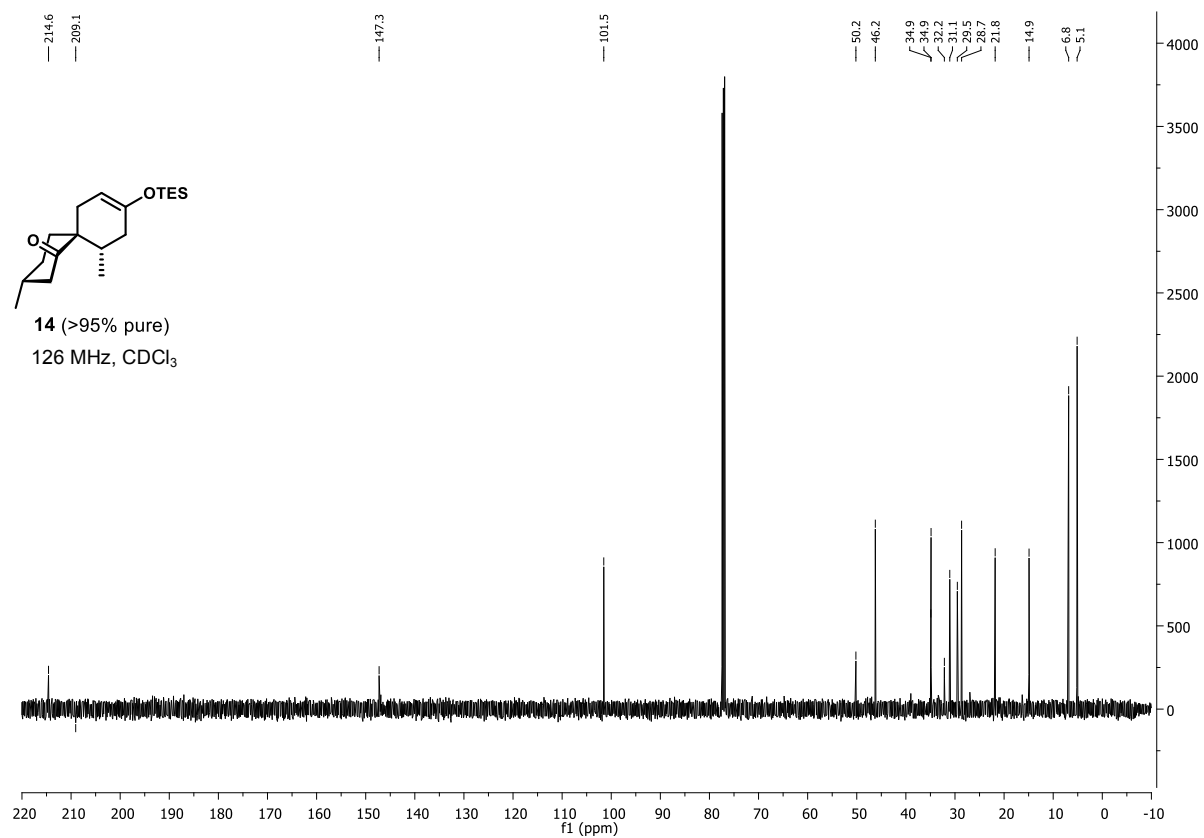

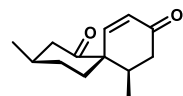

**16** (>95% pure)

500 MHz, CDCl<sub>3</sub>

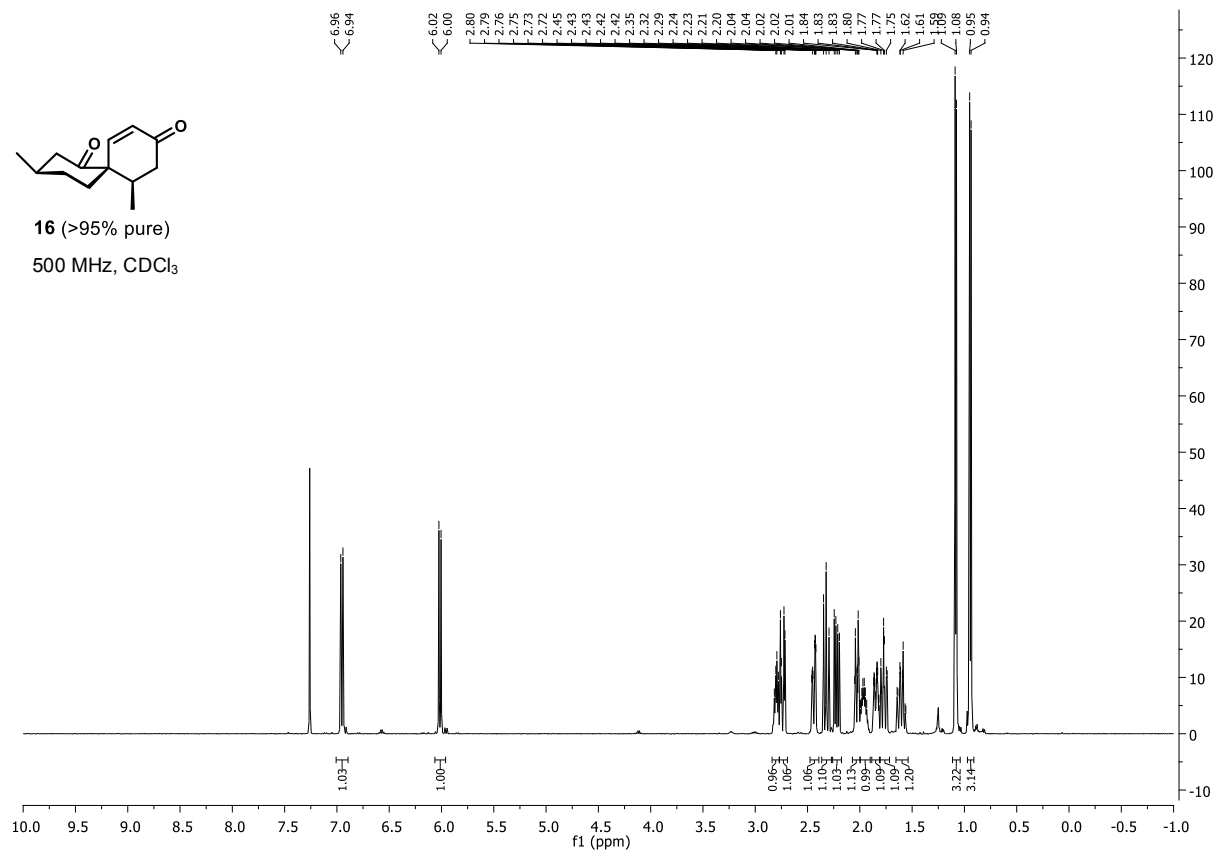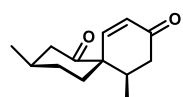

**16** (>95% pure)

126 MHz, CDCl<sub>3</sub>

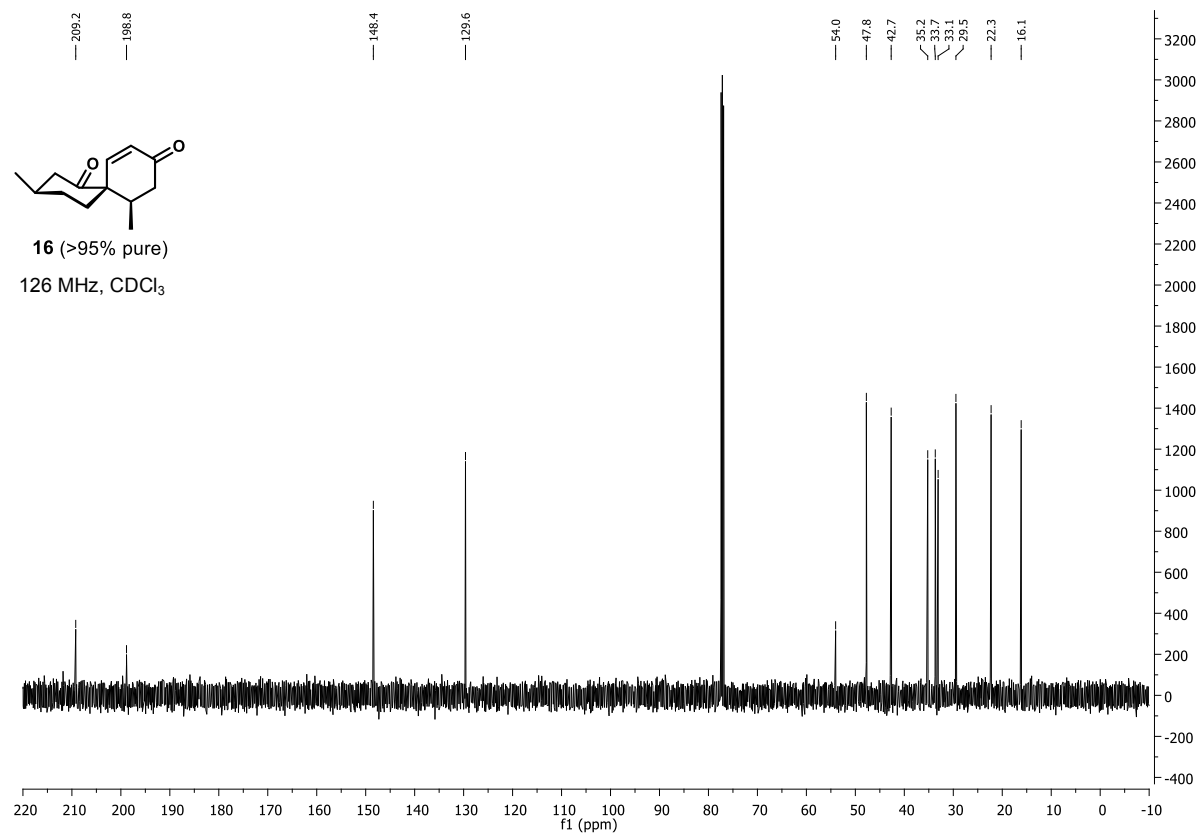

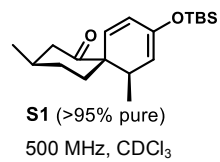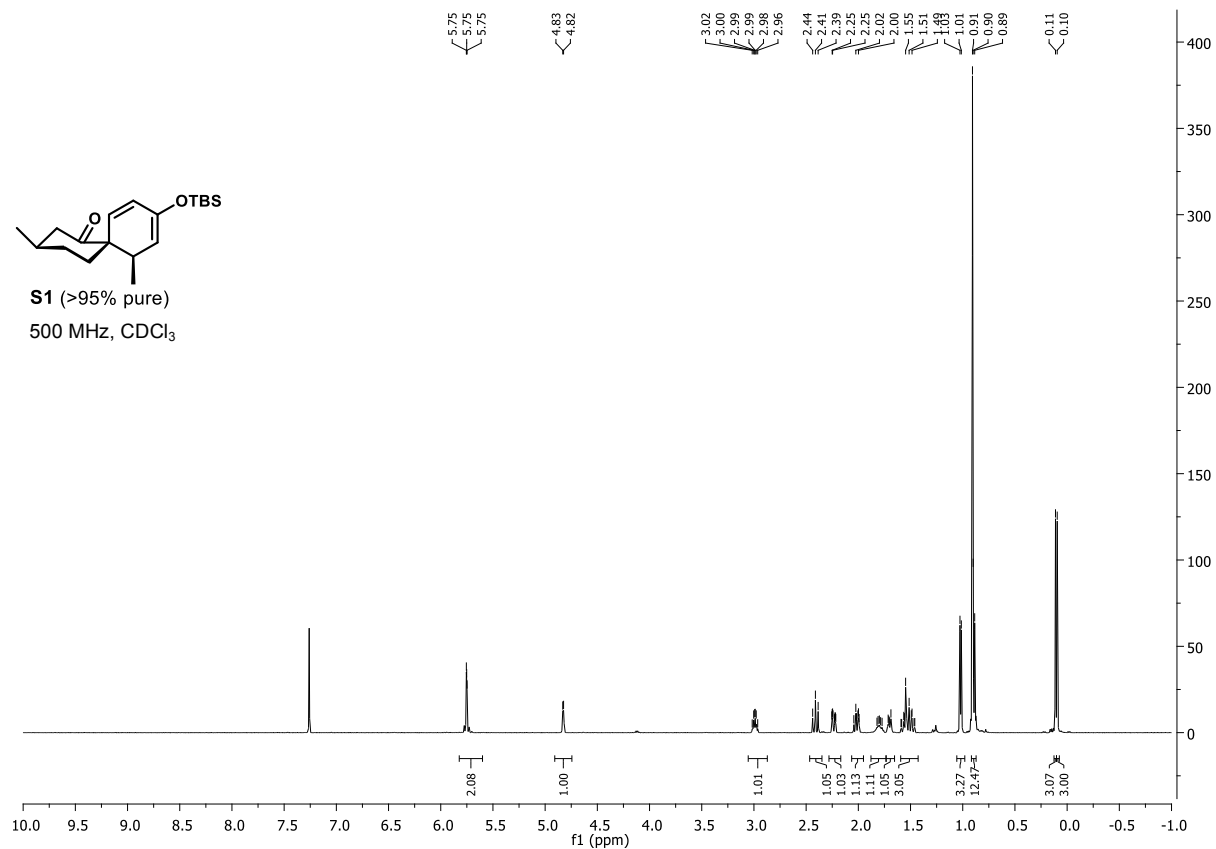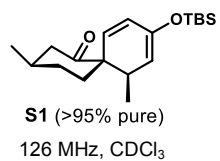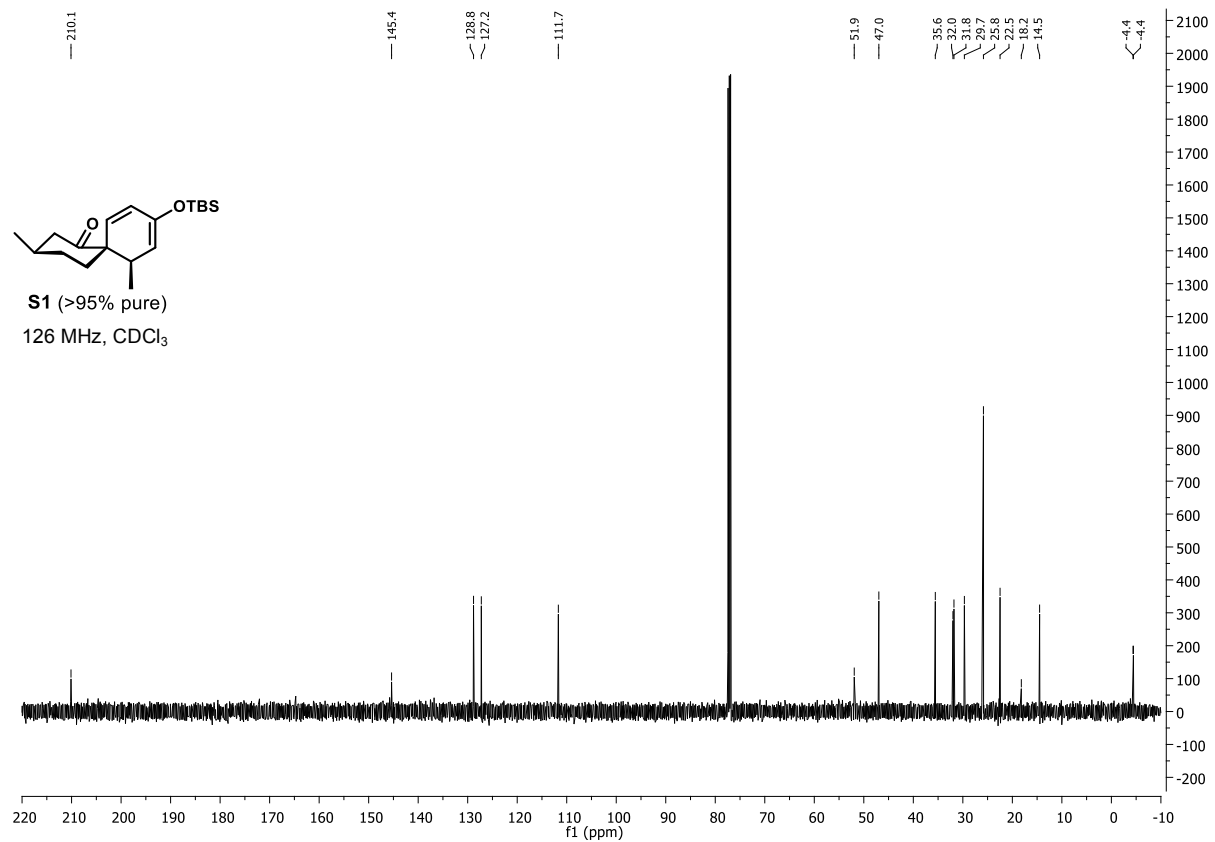

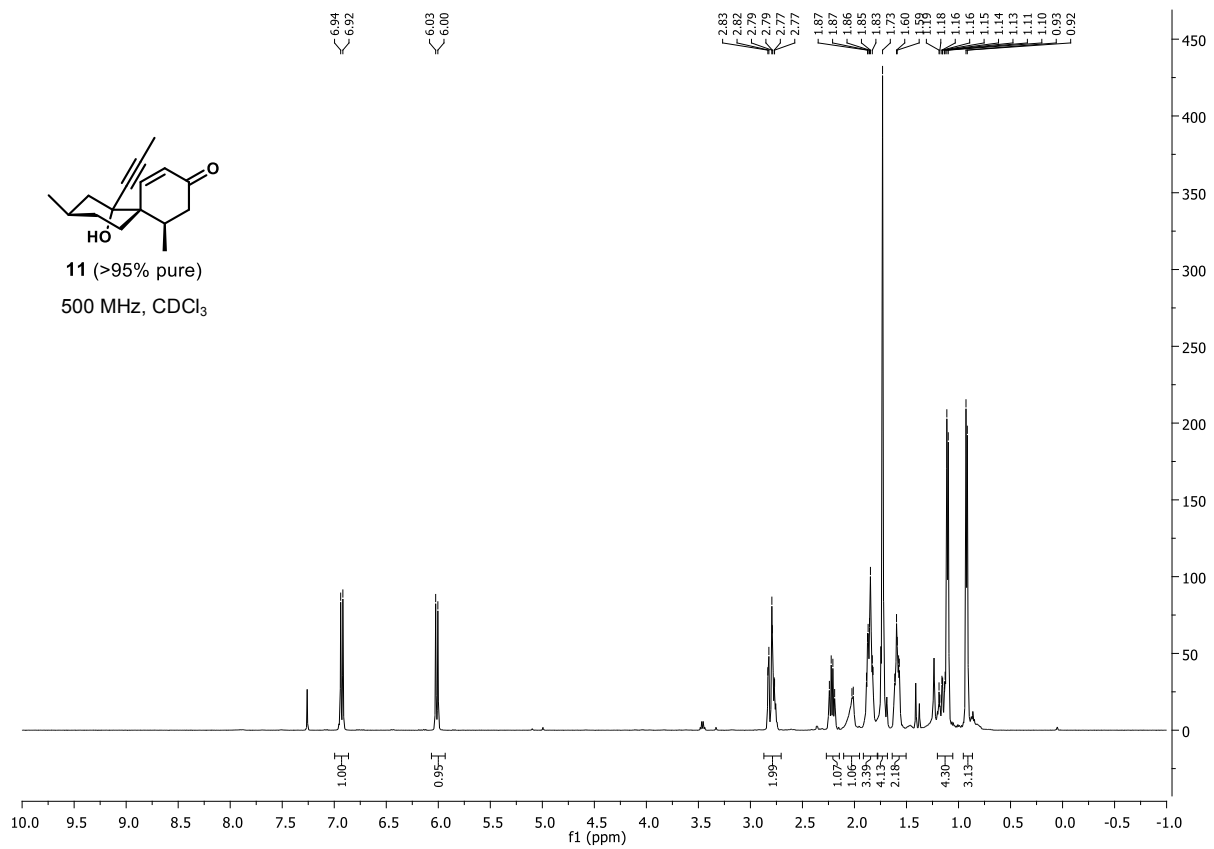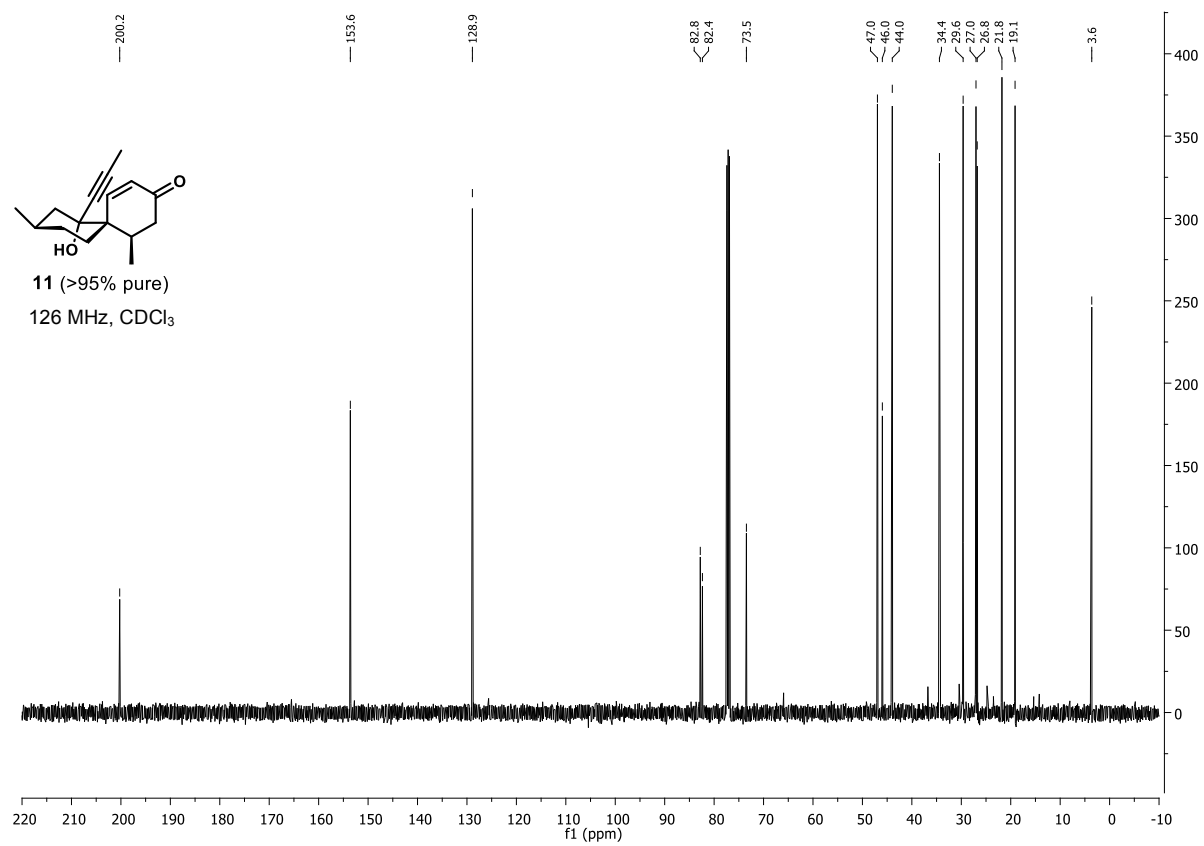

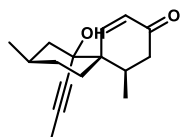

11' (>95% pure)

500 MHz, CDCl<sub>3</sub>

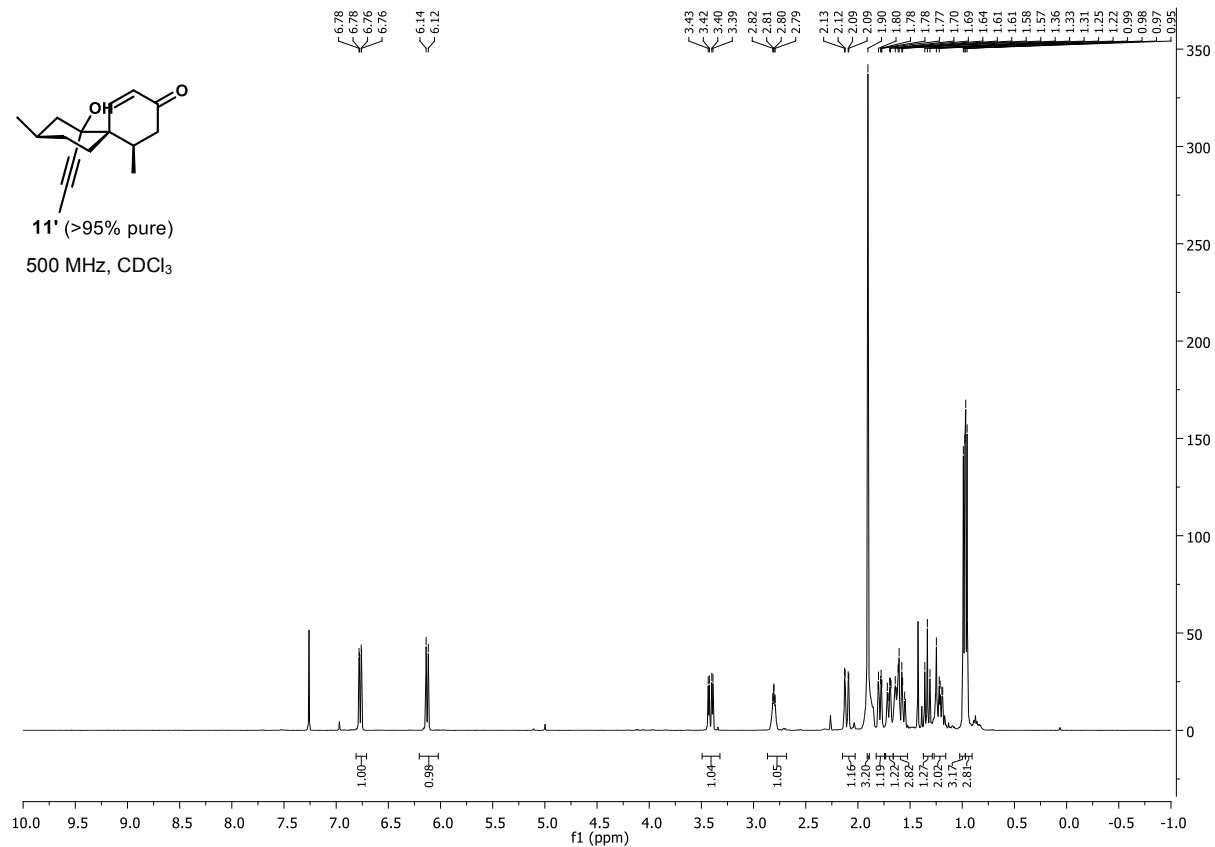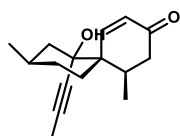

11' (>95% pure)

126 MHz, CDCl<sub>3</sub>

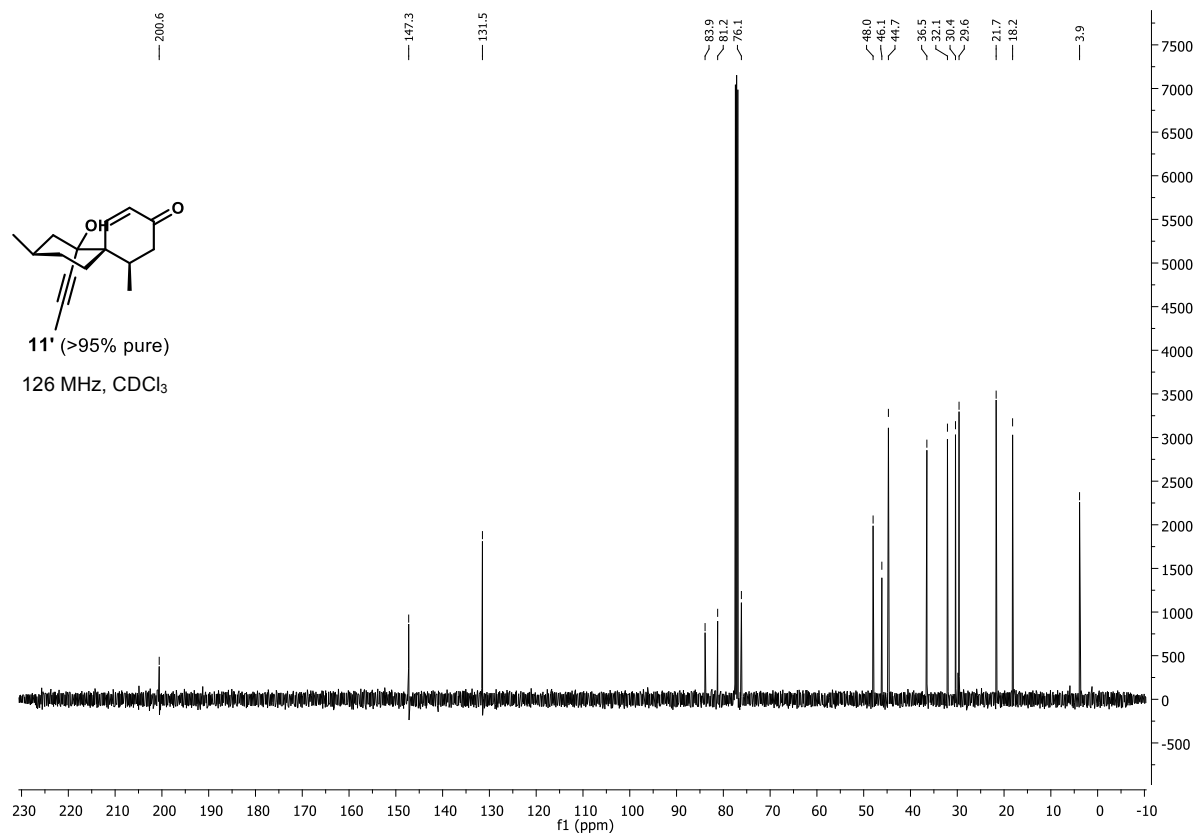

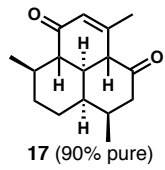

500 MHz, CDCl<sub>3</sub>

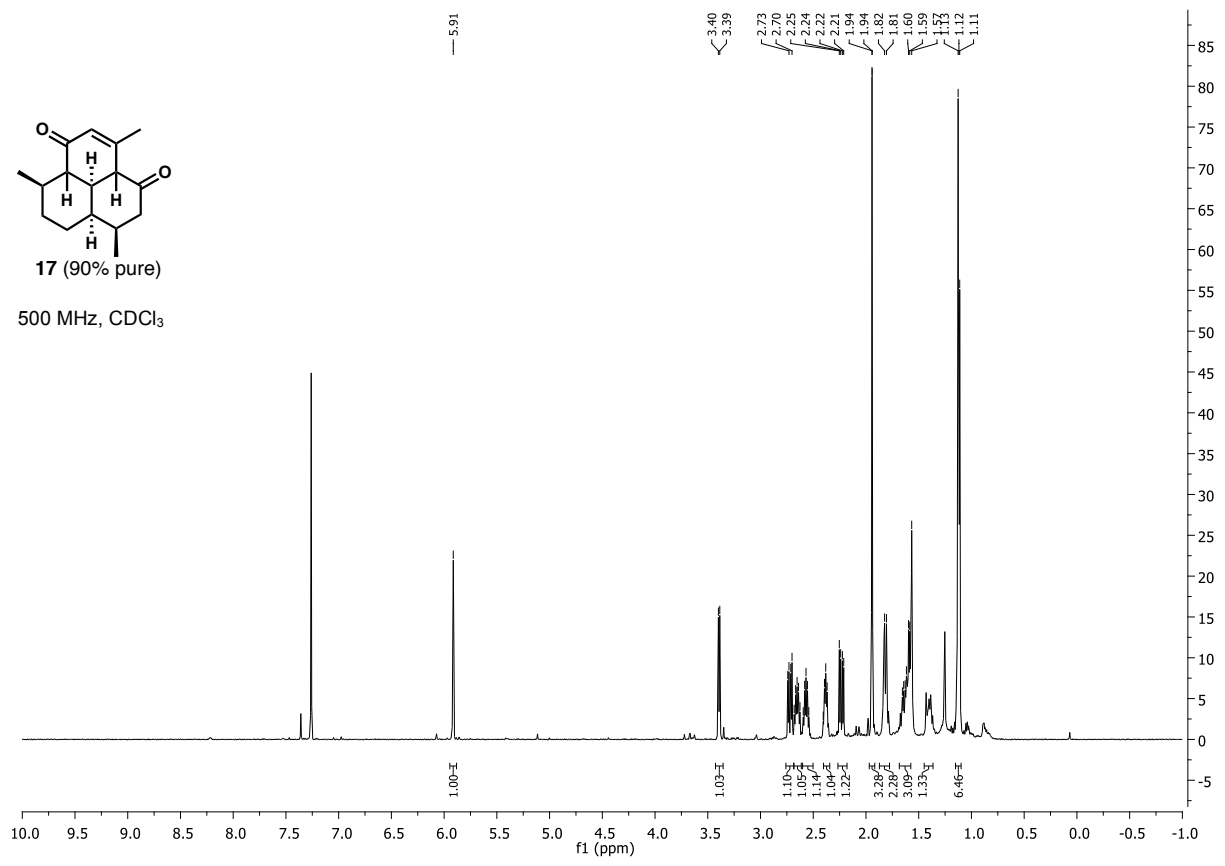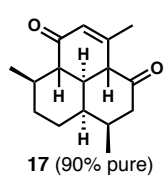

126 MHz, CDCl<sub>3</sub>

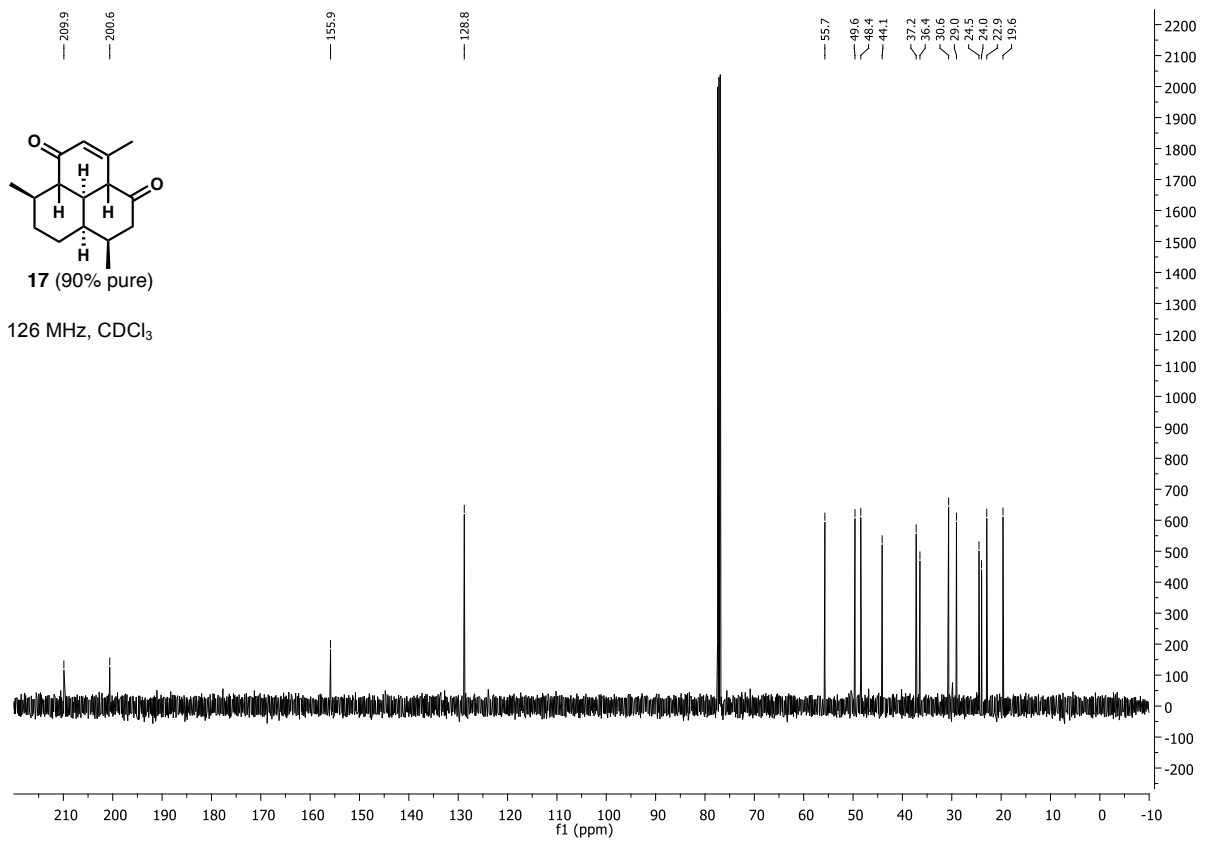



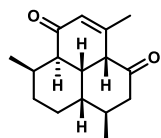

**18** (90% pure)  
500 MHz, CDCl<sub>3</sub>

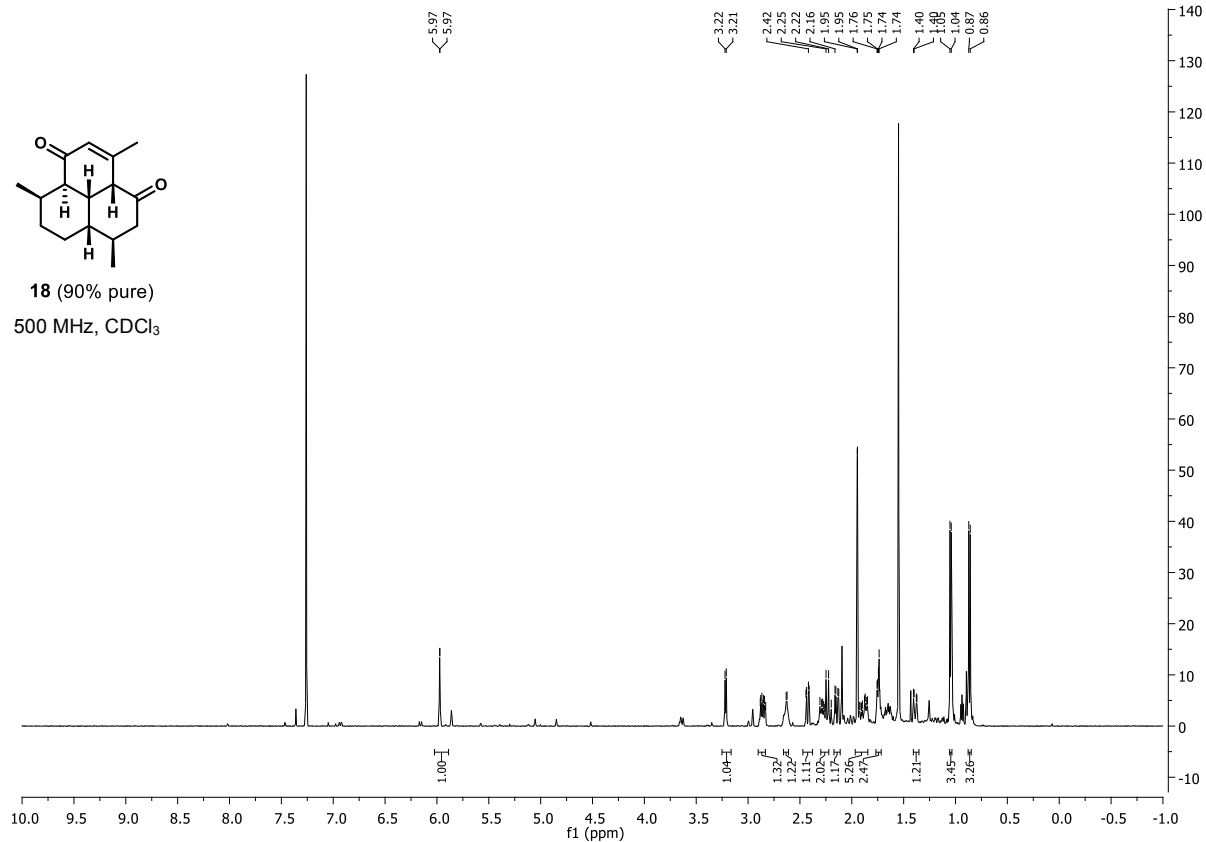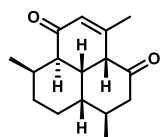

**18** (90% pure)  
126 MHz, CDCl<sub>3</sub>

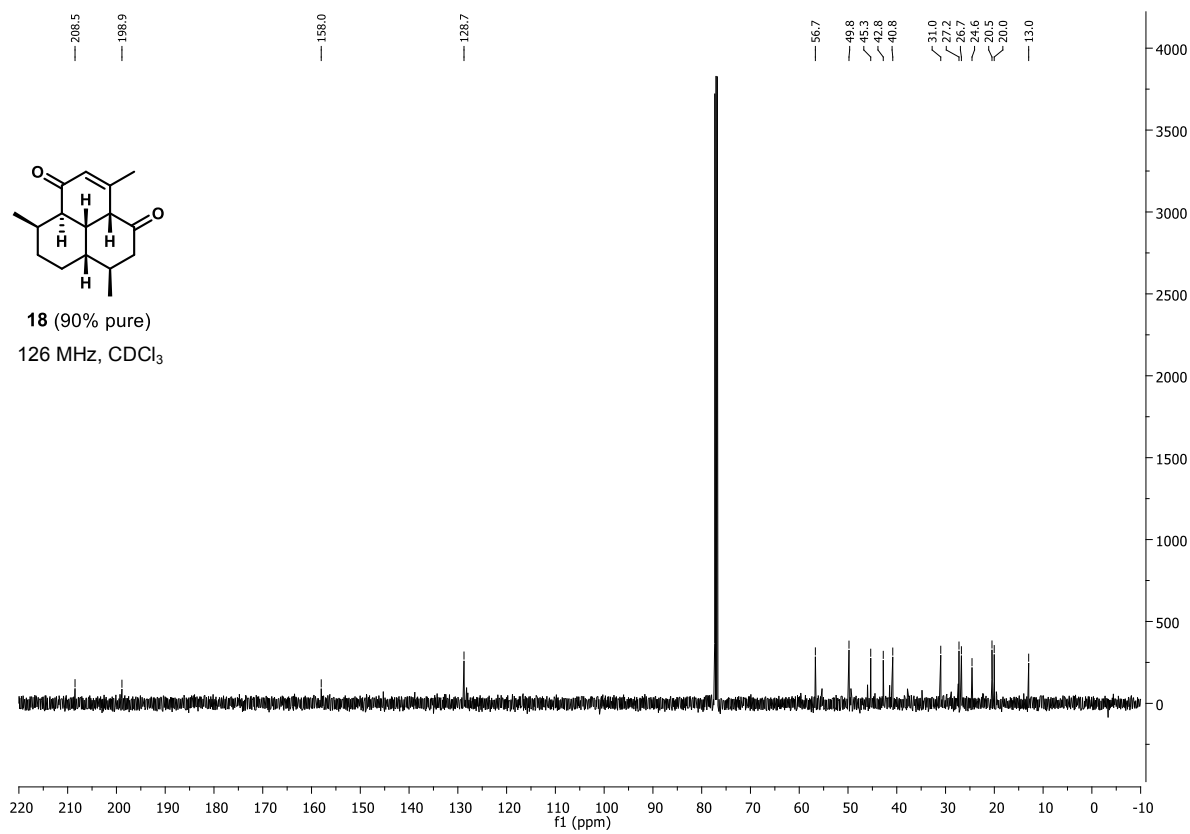

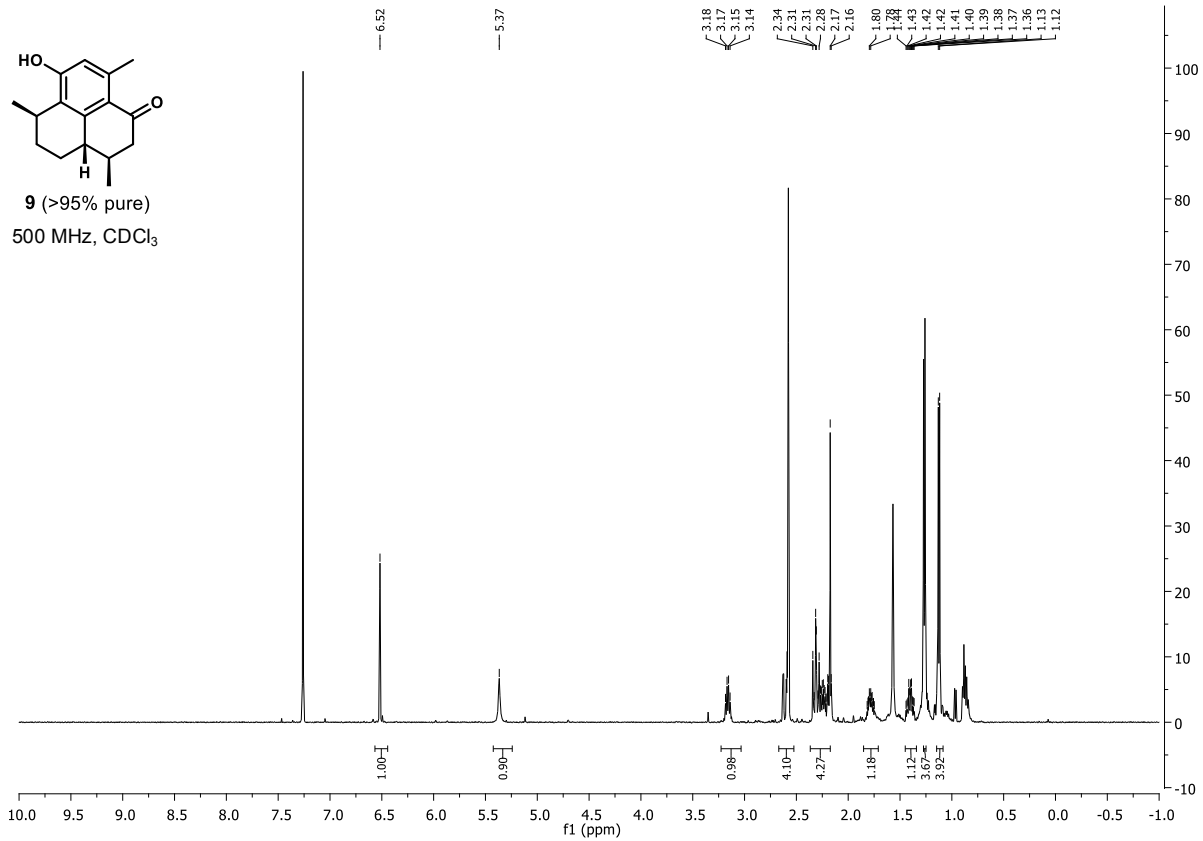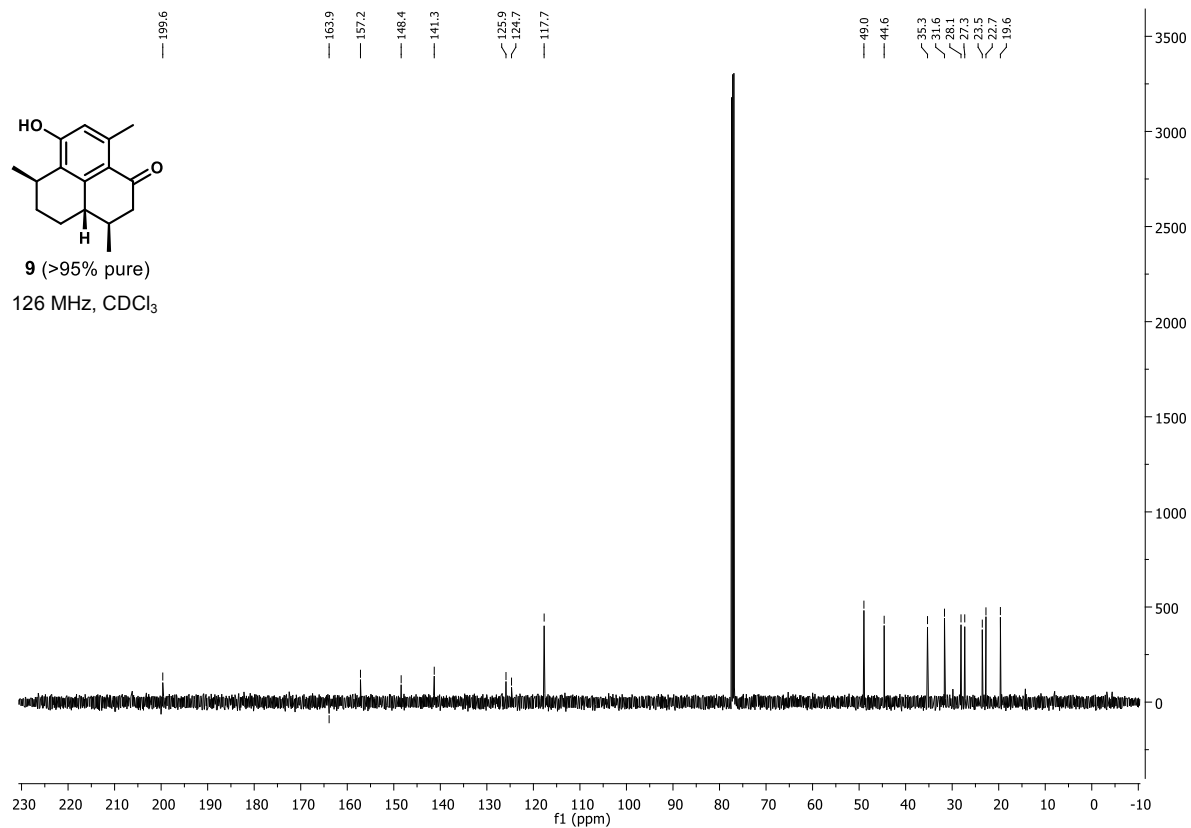

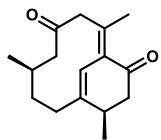

**19** (>95% pure)  
600 MHz, CDCl<sub>3</sub>

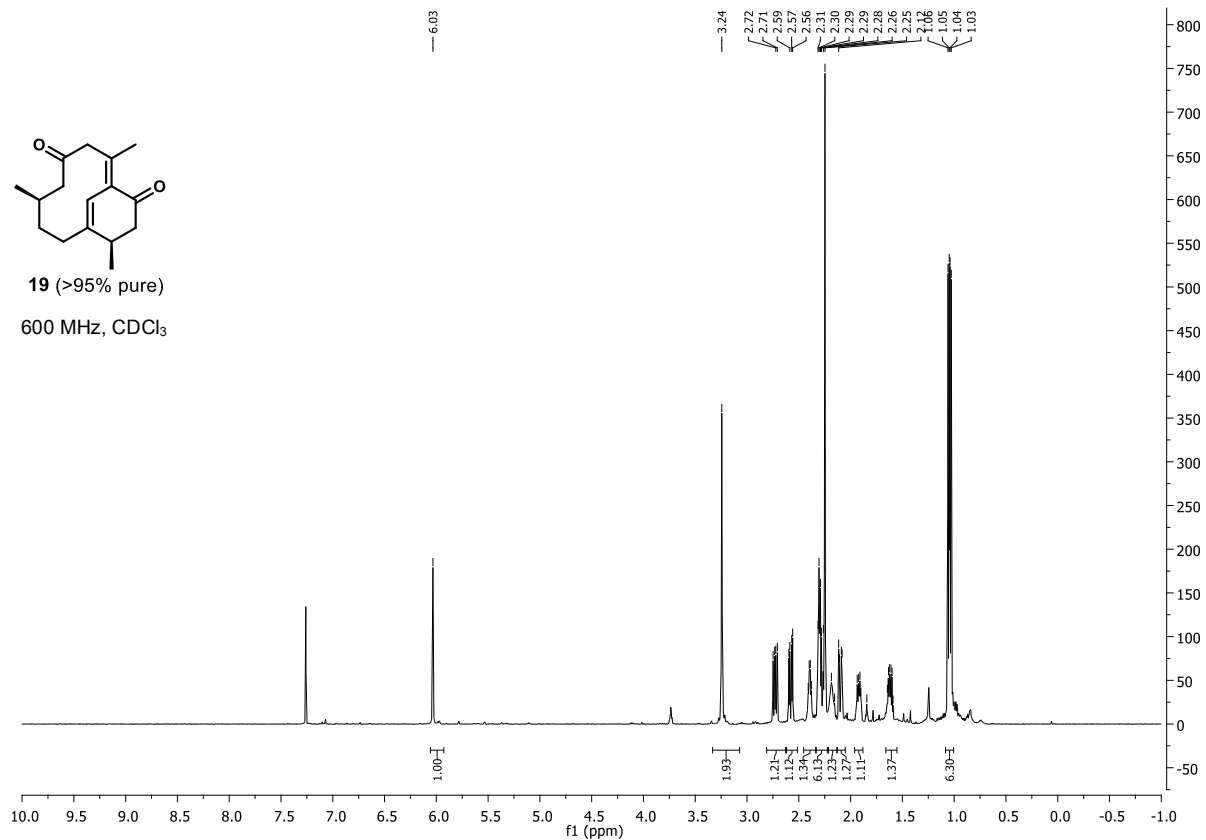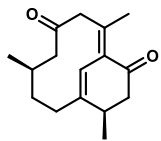

**19** (>95% pure)  
151 MHz, CDCl<sub>3</sub>

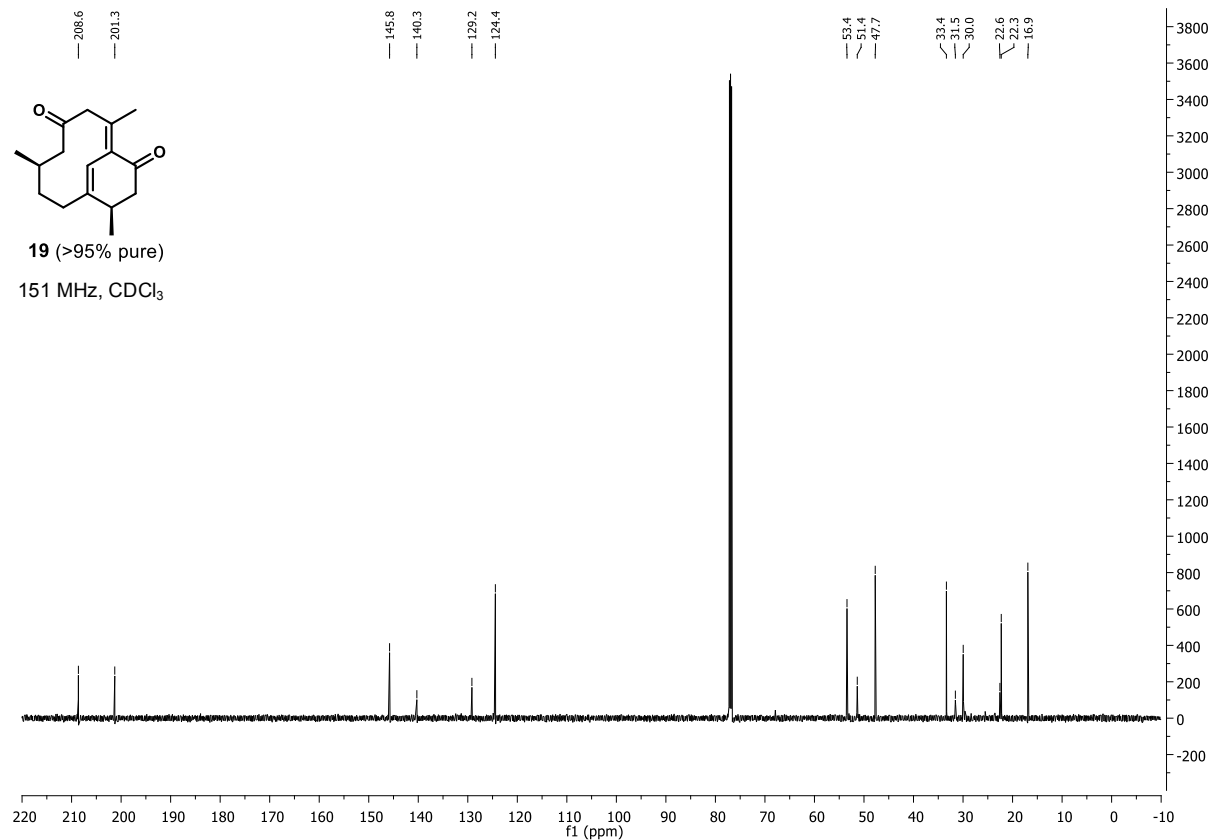

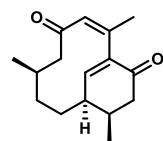

**20** (90% pure)  
600 MHz, CDCl<sub>3</sub>

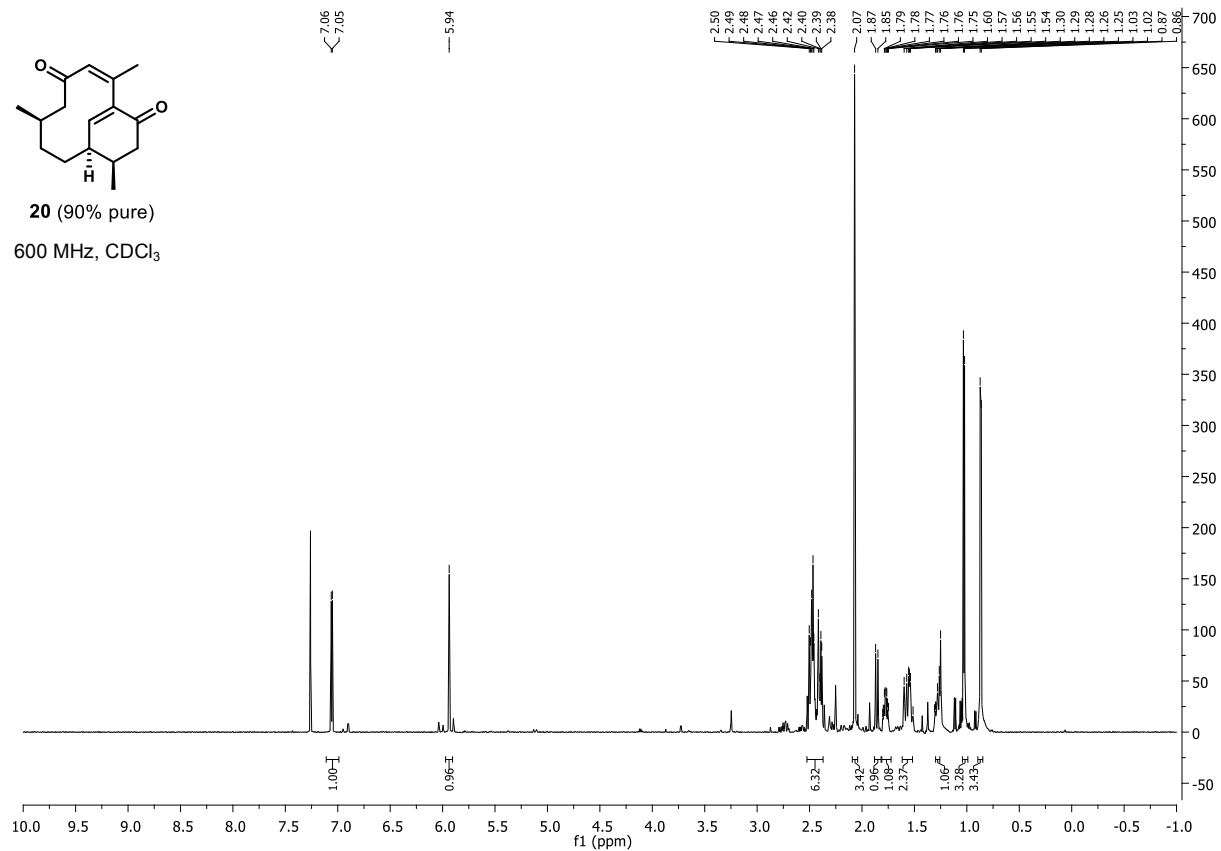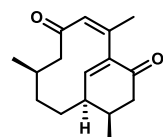

**20** (90% pure)  
151 MHz, CDCl<sub>3</sub>

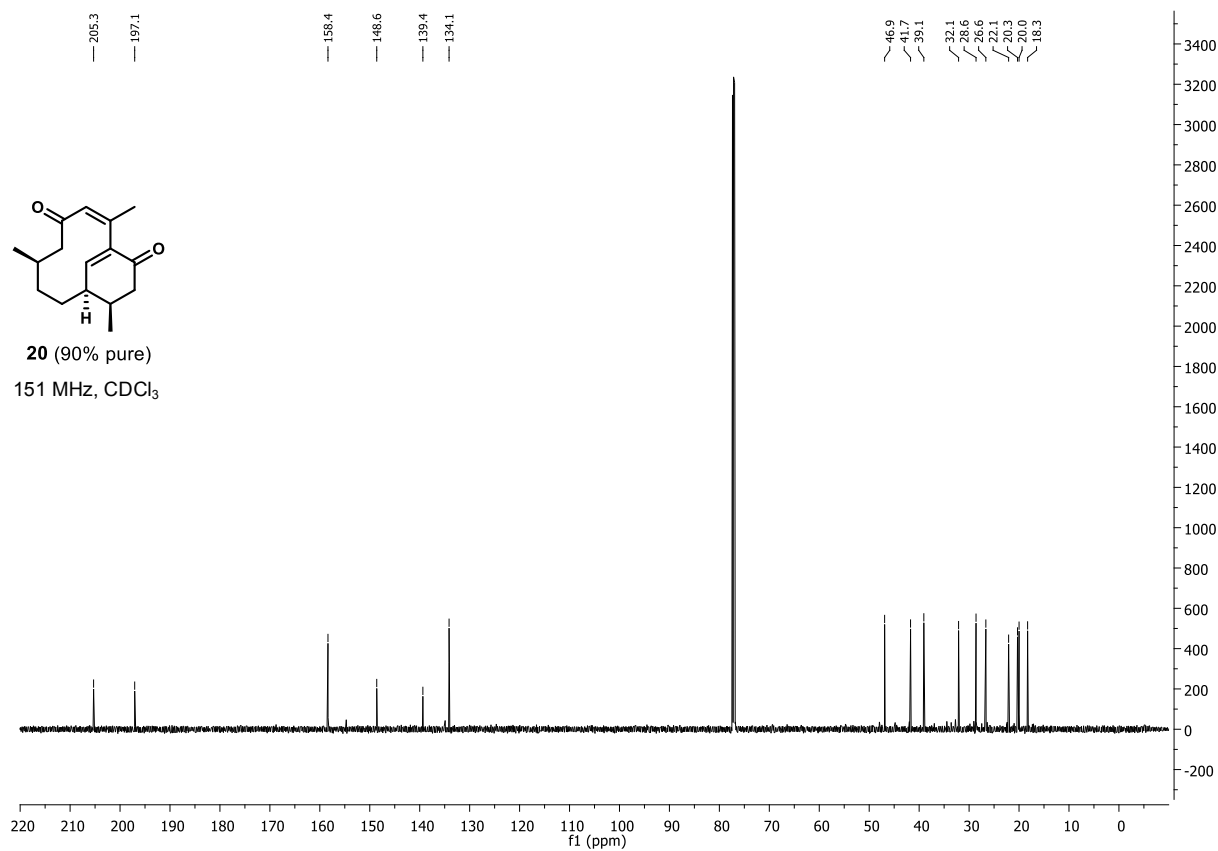

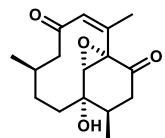

21 (75% pure)

600 MHz, CDCl<sub>3</sub>

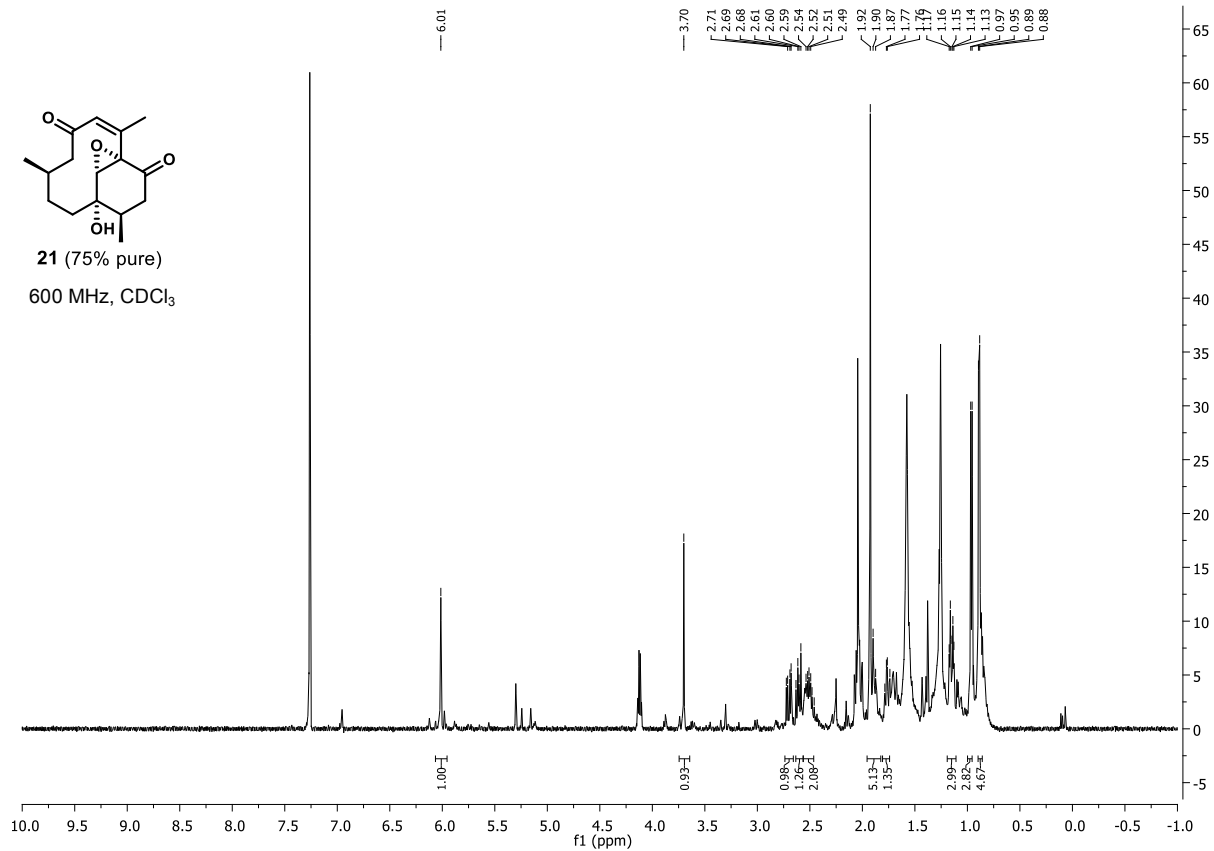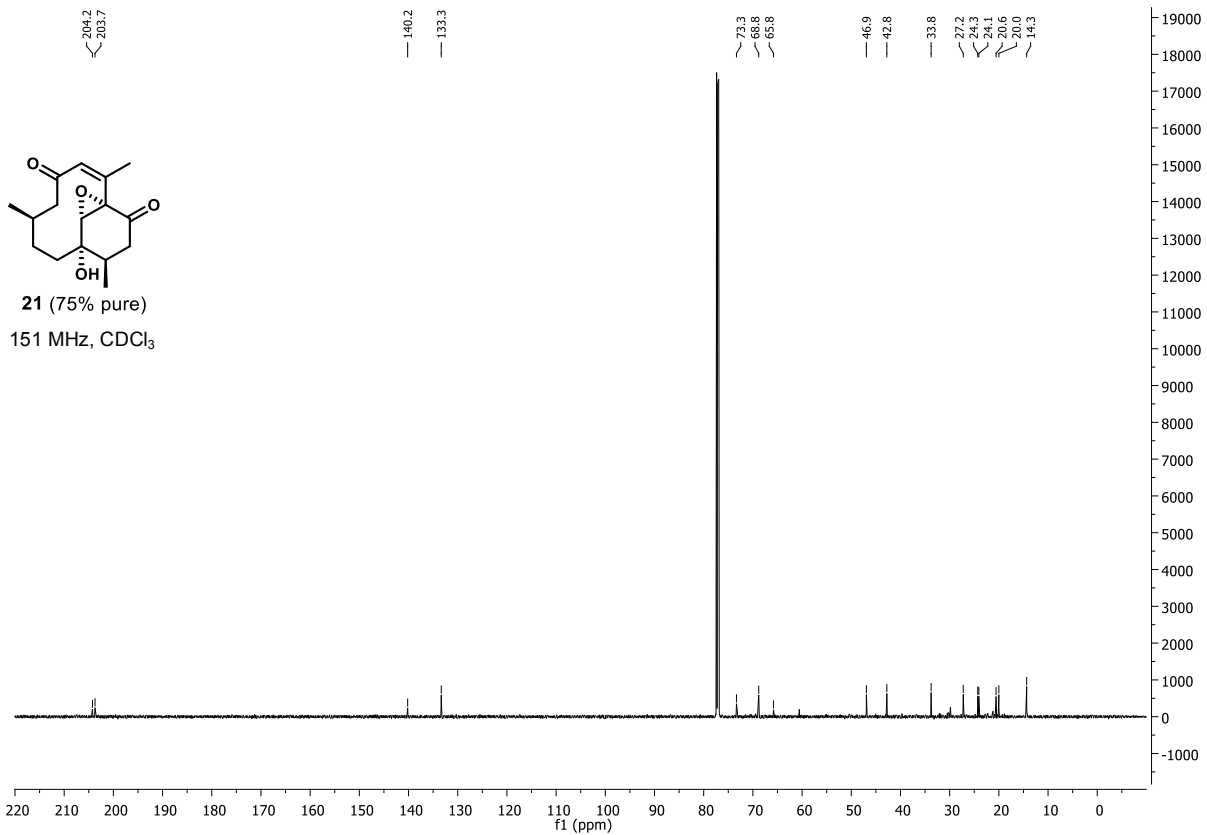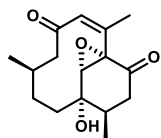

21 (75% pure)

151 MHz, CDCl<sub>3</sub>

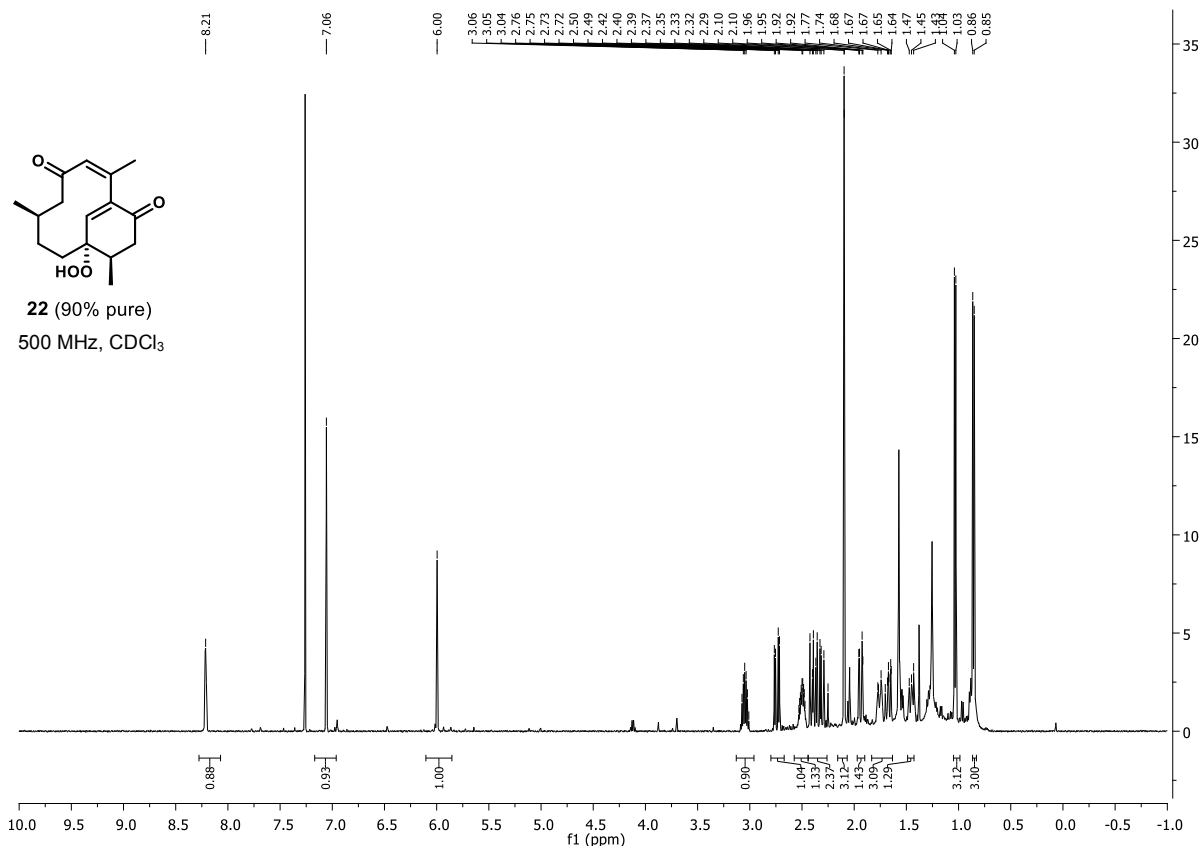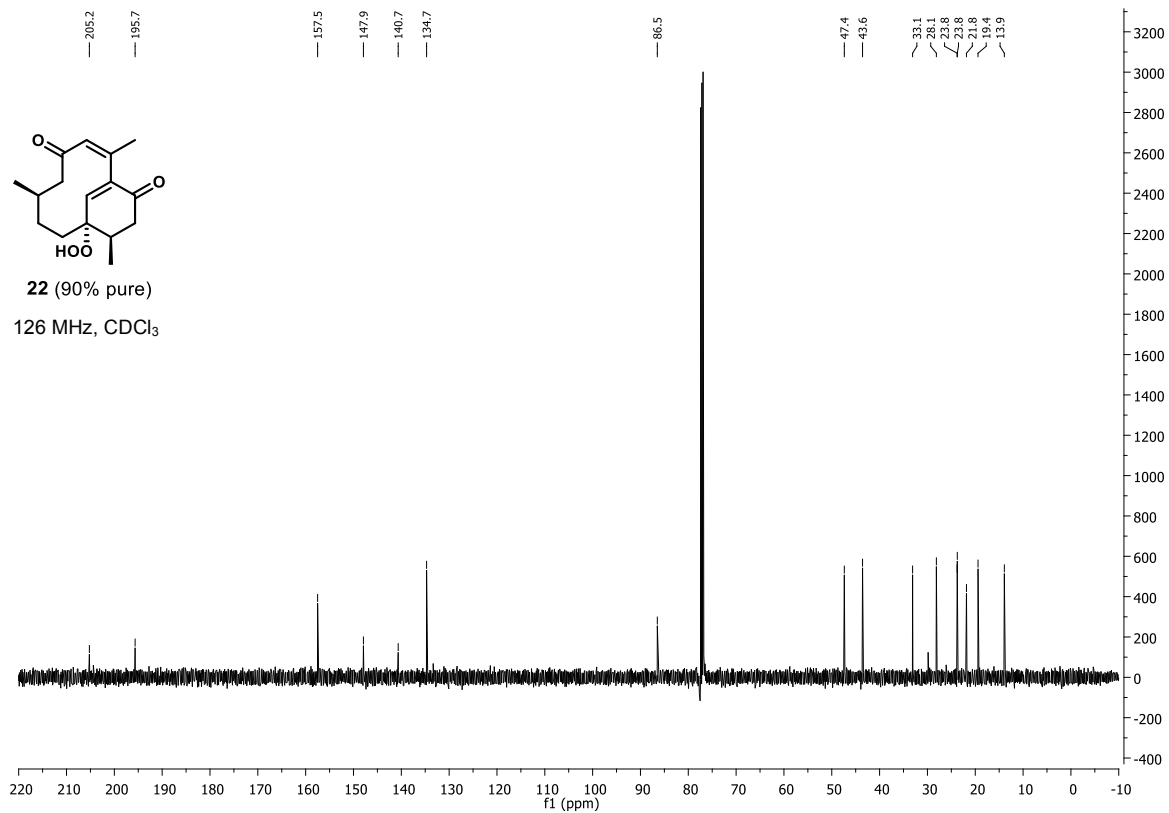

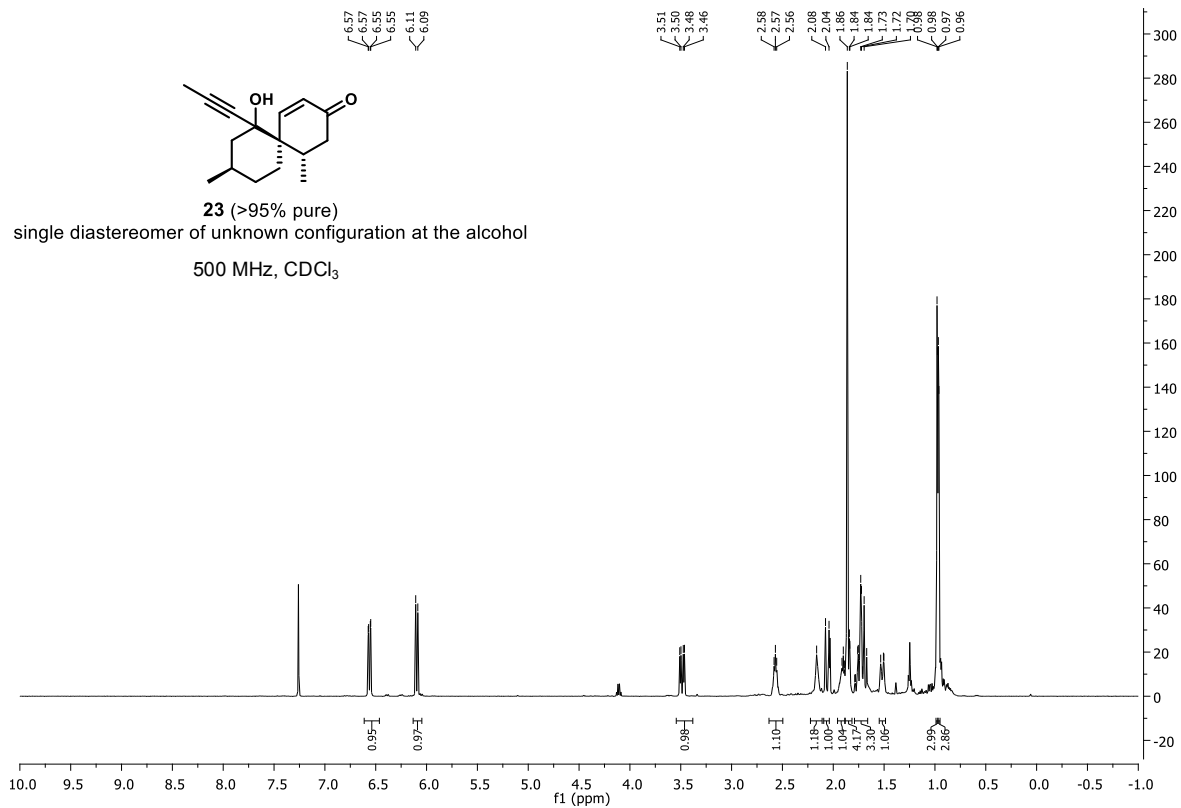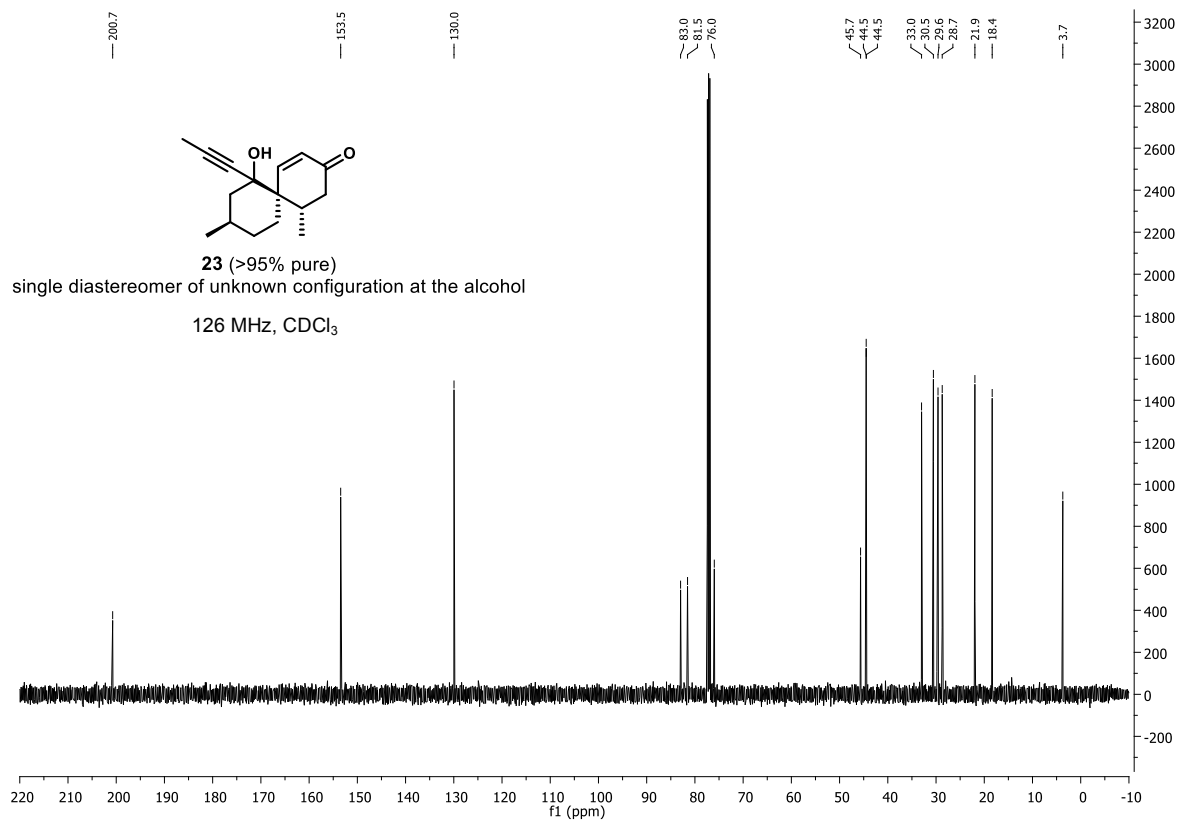

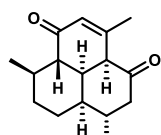

**24** (>95% pure)

500 MHz, CDCl<sub>3</sub>

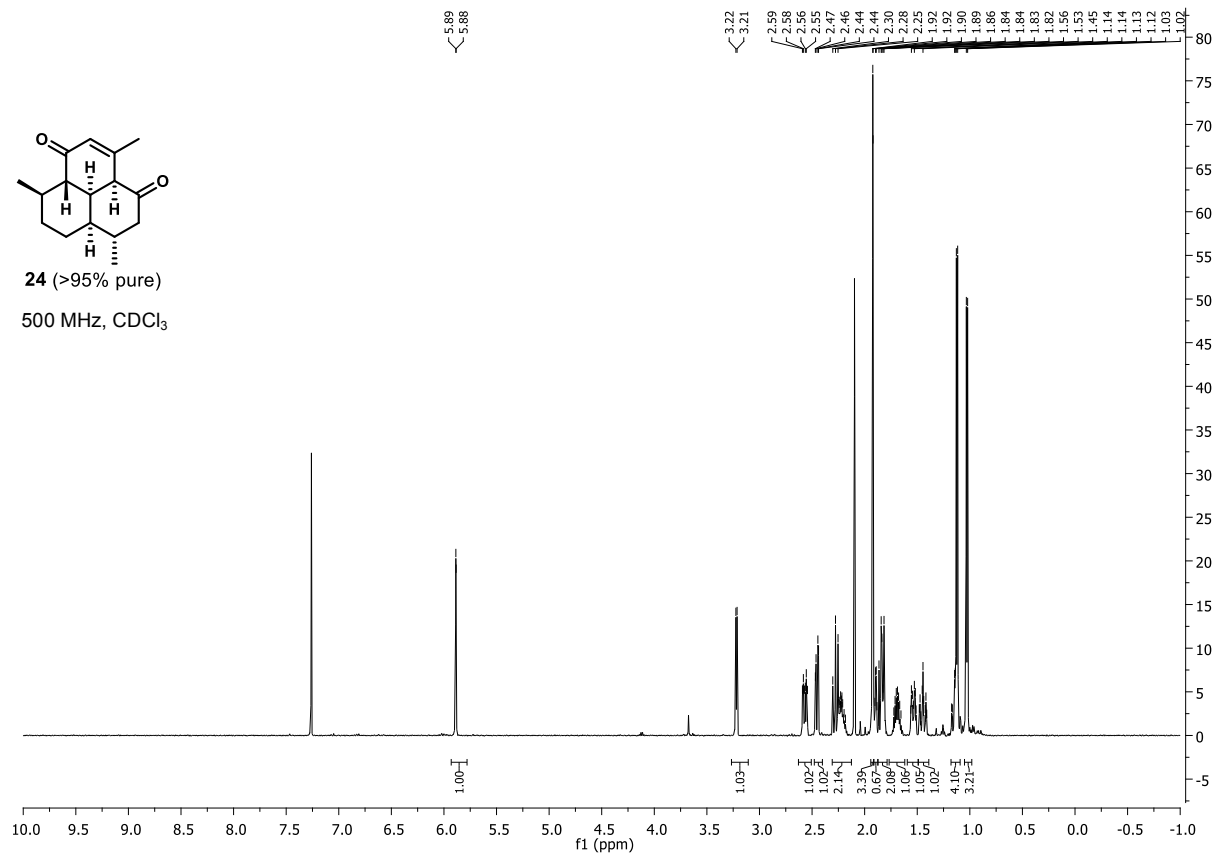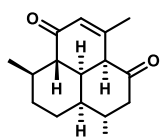

**24** (>95% pure)

126 MHz, CDCl<sub>3</sub>

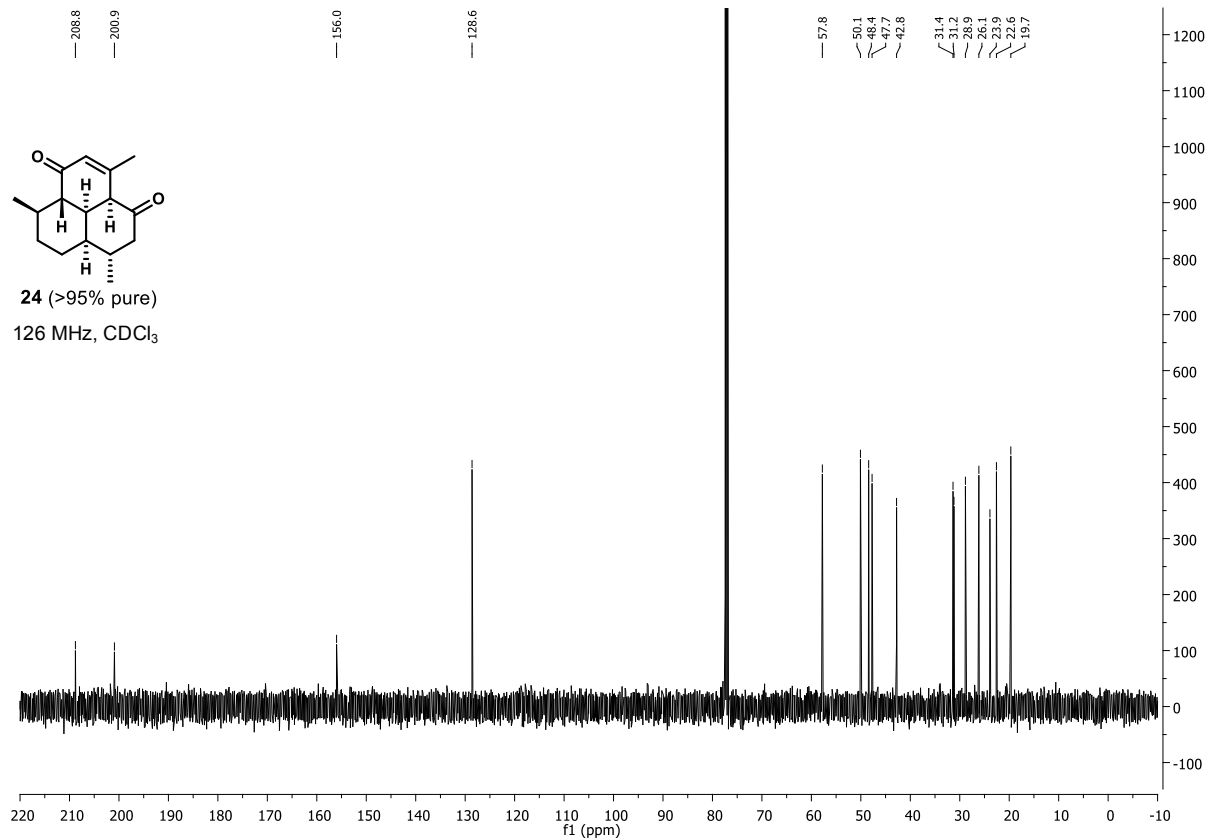



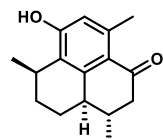

**25** (>95% pure)  
500 MHz, CDCl<sub>3</sub>

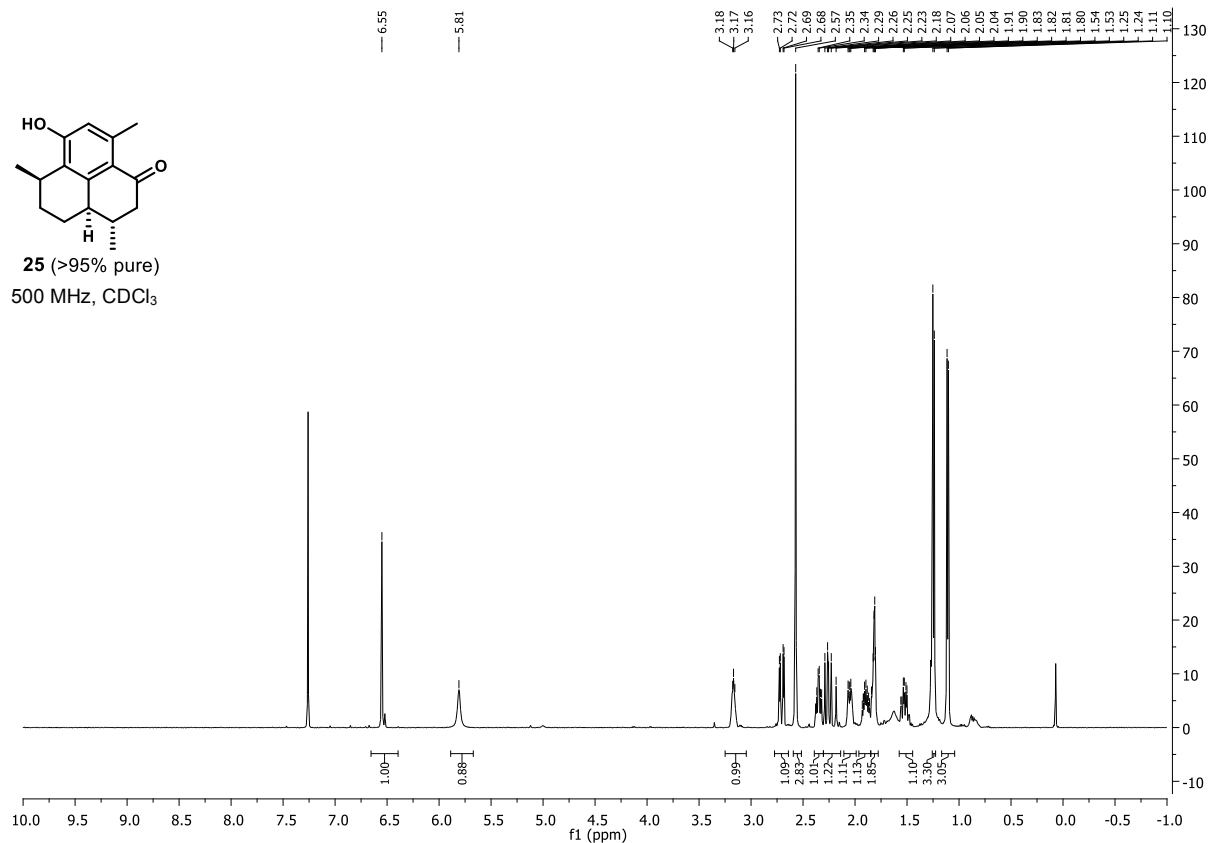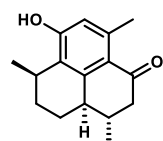

**25** (>95% pure)  
126 MHz, CDCl<sub>3</sub>

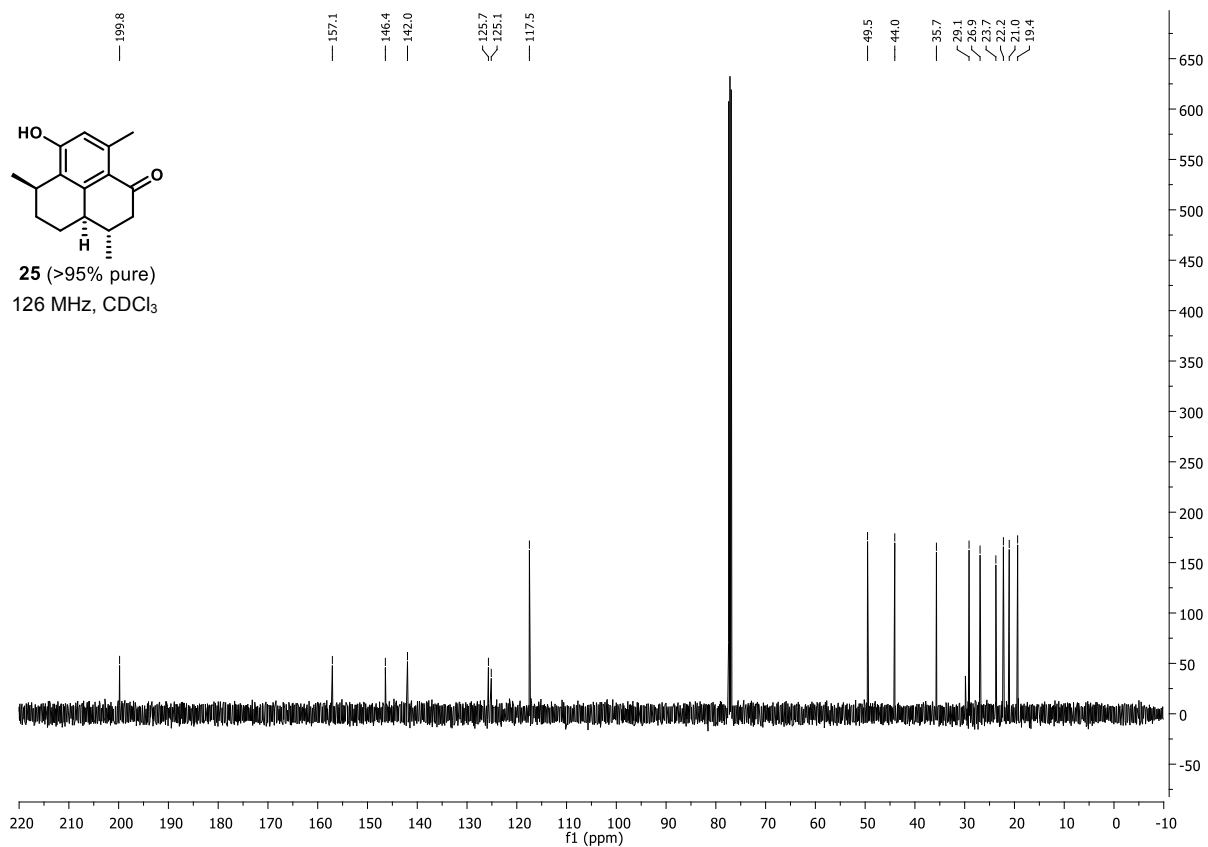

## IV. References.

1. Nannini, L. J.; Nemat, S. J.; Carreira, E. M. Total Synthesis of (+)-Sarcophytin. *Angew. Chemie Int. Ed.* **2018**, *57* (3), 823–826. <https://doi.org/10.1002/anie.201711372>.
2. Conformational Studies of R-(+)-2-Alkylidene-and R-(—)-2-Benzylidene-5-Methylcyclohexanones . *Zeitschrift für Naturforschung B* . 1981, p 978. <https://doi.org/10.1515/znb-1981-0816> .
3. Yadav, J. S.; Bhasker, E. V.; Srihari, P. Synthesis of a Key Intermediate for the Total Synthesis of Pseudopteroxazole. *Tetrahedron* **2010**, *66* (11), 1997–2004. <https://doi.org/https://doi.org/10.1016/j.tet.2010.01.054>.
4. APEX2 Version 2014.11-0, Bruker AXS, Inc.; Madison, WI 2014.
5. SAINT Version 8.34a, Bruker AXS, Inc.; Madison, WI 2013.
6. Sheldrick, G. M. SADABS, Version 2014/5, Bruker AXS, Inc.; Madison, WI 2014.
7. Sheldrick, G. M. SHELXTL, Version 2014/7, Bruker AXS, Inc.; Madison, WI 2014.
8. International Tables for Crystallography 1992, Vol. C., Dordrecht: Kluwer Academic Publishers.
